# Supplementary material for: Applied Self-Supervised Learning: Review of the State-of-the-Art and Implementations in Medicine
Source: Preprints.org preprint supplement (doi:10.20944/preprints202108.0238.v1), 2021-08-11
Supplement: Supplementary file 3 [file supplementary]

## Sheet: gs "self-supervised learning"
2021 resulting Self-Supervised Learning paper collection as published in A. Chowdhury, J. Rosenthal, J. Waring, R. Umeton, 2021.
Review - Applied Self-Supervised Learning: Review of the State of the Art and Implementations in Medicine, 2021.
# Citations	Authors	Title	Year	Source	Publisher	ArticleURL	Link
1647	D Pathak, P Krahenbuhl, J Donahue…	Context encoders: Feature learning by inpainting	2016	Proceedings of the …	openaccess.thecvf.com	http://openaccess.thecvf.com/content_cvpr_2016/html/Pathak_Context_Encoders_Feature_CVPR_2016_paper.html	http://openaccess.thecvf.com/content_cvpr_2016/html/Pathak_Context_Encoders_Feature_CVPR_2016_paper.html
950	R Zhang, P Isola, AA Efros	Colorful image colorization	2016	European conference on computer vision	Springer	https://link.springer.com/chapter/10.1007/978-3-319-46487-9_40	https://link.springer.com/chapter/10.1007/978-3-319-46487-9_40
384	M Noroozi, P Favaro	Unsupervised learning of visual representations by solving jigsaw puzzles	2016	European Conference on Computer Vision	Springer	https://link.springer.com/chapter/10.1007/978-3-319-46466-4_5	https://link.springer.com/chapter/10.1007/978-3-319-46466-4_5
366	P Agrawal, J Carreira, J Malik	Learning to see by moving	2015	Proceedings of the IEEE …	cv-foundation.org	https://www.cv-foundation.org/openaccess/content_iccv_2015/html/Agrawal_Learning_to_See_ICCV_2015_paper.html	https://www.cv-foundation.org/openaccess/content_iccv_2015/html/Agrawal_Learning_to_See_ICCV_2015_paper.html
248	M Caron, P Bojanowski, A Joulin…	Deep clustering for unsupervised learning of visual features	2018	Proceedings of the …	openaccess.thecvf.com	http://openaccess.thecvf.com/content_ECCV_2018/html/Mathilde_Caron_Deep_Clustering_for_ECCV_2018_paper.html	http://openaccess.thecvf.com/content_ECCV_2018/html/Mathilde_Caron_Deep_Clustering_for_ECCV_2018_paper.html
245	AR Zamir, A Sax, W Shen, LJ Guibas…	Taskonomy: Disentangling task transfer learning	2018	Proceedings of the …	openaccess.thecvf.com	http://openaccess.thecvf.com/content_cvpr_2018/html/Zamir_Taskonomy_Disentangling_Task_CVPR_2018_paper.html	http://openaccess.thecvf.com/content_cvpr_2018/html/Zamir_Taskonomy_Disentangling_Task_CVPR_2018_paper.html
244	A Chang, A Dai, T Funkhouser, M Halber…	Matterport3d: Learning from rgb-d data in indoor environments	2017	arXiv preprint arXiv …	arxiv.org	https://arxiv.org/abs/1709.06158	https://arxiv.org/abs/1709.06158
232	S Gidaris, P Singh, N Komodakis	Unsupervised representation learning by predicting image rotations	2018	arXiv preprint arXiv:1803.07728	arxiv.org	https://arxiv.org/abs/1803.07728	https://arxiv.org/abs/1803.07728
201	A Zeng, S Song, M Nießner, M Fisher…	3dmatch: Learning local geometric descriptors from rgb-d reconstructions	2017	Proceedings of the …	openaccess.thecvf.com	http://openaccess.thecvf.com/content_cvpr_2017/html/Zeng_3DMatch_Learning_Local_CVPR_2017_paper.html	http://openaccess.thecvf.com/content_cvpr_2017/html/Zeng_3DMatch_Learning_Local_CVPR_2017_paper.html
198	S Vijayanarasimhan, S Ricco, C Schmid…	Sfm-net: Learning of structure and motion from video	2017	arXiv preprint arXiv …	arxiv.org	https://arxiv.org/abs/1704.07804	https://arxiv.org/abs/1704.07804
188	J Wu, I Yildirim, JJ Lim, B Freeman…	Galileo: Perceiving physical object properties by integrating a physics engine with deep learning	2015	Advances in neural …	papers.nips.cc	http://papers.nips.cc/paper/5780-galileo-perceiving-physical-object-properties-by-integrating-a-physics-engine-with-deep-learning	http://papers.nips.cc/paper/5780-galileo-perceiving-physical-object-properties-by-integrating-a-physics-engine-with-deep-learning
186	C Doersch, A Zisserman	Multi-task self-supervised visual learning	2017	Proceedings of the IEEE …	openaccess.thecvf.com	http://openaccess.thecvf.com/content_iccv_2017/html/Doersch_Multi-Task_Self-Supervised_Visual_ICCV_2017_paper.html	http://openaccess.thecvf.com/content_iccv_2017/html/Doersch_Multi-Task_Self-Supervised_Visual_ICCV_2017_paper.html
175	A Oord, Y Li, O Vinyals	Representation learning with contrastive predictive coding	2018	arXiv preprint arXiv:1807.03748	arxiv.org	https://arxiv.org/abs/1807.03748	https://arxiv.org/abs/1807.03748
174	R Zhang, P Isola, AA Efros	Split-brain autoencoders: Unsupervised learning by cross-channel prediction	2017	Proceedings of the IEEE …	openaccess.thecvf.com	http://openaccess.thecvf.com/content_cvpr_2017/html/Zhang_Split-Brain_Autoencoders_Unsupervised_CVPR_2017_paper.html	http://openaccess.thecvf.com/content_cvpr_2017/html/Zhang_Split-Brain_Autoencoders_Unsupervised_CVPR_2017_paper.html
171	A Zeng, KT Yu, S Song, D Suo, E Walker…	Multi-view self-supervised deep learning for 6d pose estimation in the amazon picking challenge	2017	… on robotics and …	ieeexplore.ieee.org	https://ieeexplore.ieee.org/abstract/document/7989165/	https://ieeexplore.ieee.org/abstract/document/7989165/
170	K Gong, X Liang, D Zhang…	Look into person: Self-supervised structure-sensitive learning and a new benchmark for human parsing	2017	Proceedings of the …	openaccess.thecvf.com	http://openaccess.thecvf.com/content_cvpr_2017/html/Gong_Look_Into_Person_CVPR_2017_paper.html	http://openaccess.thecvf.com/content_cvpr_2017/html/Gong_Look_Into_Person_CVPR_2017_paper.html
170	A Owens, J Wu, JH McDermott, WT Freeman…	Ambient sound provides supervision for visual learning	2016	European conference on …	Springer	https://link.springer.com/chapter/10.1007/978-3-319-46448-0_48	https://link.springer.com/chapter/10.1007/978-3-319-46448-0_48
156	S Levine, P Pastor, A Krizhevsky, D Quillen	Learning hand-eye coordination for robotic grasping with large-scale data collection	2016	International symposium on …	Springer	https://link.springer.com/chapter/10.1007/978-3-319-50115-4_16	https://link.springer.com/chapter/10.1007/978-3-319-50115-4_16
142	D Gandhi, L Pinto, A Gupta	Learning to fly by crashing	2017	2017 IEEE/RSJ International …	ieeexplore.ieee.org	https://ieeexplore.ieee.org/abstract/document/8206247/	https://ieeexplore.ieee.org/abstract/document/8206247/
137	A Owens, AA Efros	Audio-visual scene analysis with self-supervised multisensory features	2018	Proceedings of the European …	openaccess.thecvf.com	http://openaccess.thecvf.com/content_ECCV_2018/html/Andrew_Owens_Audio-Visual_Scene_Analysis_ECCV_2018_paper.html	http://openaccess.thecvf.com/content_ECCV_2018/html/Andrew_Owens_Audio-Visual_Scene_Analysis_ECCV_2018_paper.html
135	P Krähenbühl, C Doersch, J Donahue…	Data-dependent initializations of convolutional neural networks	2015	arXiv preprint arXiv …	arxiv.org	https://arxiv.org/abs/1511.06856	https://arxiv.org/abs/1511.06856
121	HY Lee, JB Huang, M Singh…	Unsupervised representation learning by sorting sequences	2017	Proceedings of the IEEE …	openaccess.thecvf.com	http://openaccess.thecvf.com/content_iccv_2017/html/Lee_Unsupervised_Representation_Learning_ICCV_2017_paper.html	http://openaccess.thecvf.com/content_iccv_2017/html/Lee_Unsupervised_Representation_Learning_ICCV_2017_paper.html
120	M Sundermeyer, ZC Marton, M Durner…	Implicit 3d orientation learning for 6d object detection from rgb images	2018	Proceedings of the …	openaccess.thecvf.com	http://openaccess.thecvf.com/content_ECCV_2018/html/Martin_Sundermeyer_Implicit_3D_Orientation_ECCV_2018_paper.html	http://openaccess.thecvf.com/content_ECCV_2018/html/Martin_Sundermeyer_Implicit_3D_Orientation_ECCV_2018_paper.html
114	C Sammut, GI Webb	Encyclopedia of machine learning and data mining	2017		dl.acm.org	https://dl.acm.org/citation.cfm?id=3153490	https://dl.acm.org/citation.cfm?id=3153490
108	M Noroozi, H Pirsiavash…	Representation learning by learning to count	2017	Proceedings of the IEEE …	openaccess.thecvf.com	http://openaccess.thecvf.com/content_iccv_2017/html/Noroozi_Representation_Learning_by_ICCV_2017_paper.html	http://openaccess.thecvf.com/content_iccv_2017/html/Noroozi_Representation_Learning_by_ICCV_2017_paper.html
107	P Sermanet, C Lynch, Y Chebotar, J Hsu…	Time-contrastive networks: Self-supervised learning from video	2018	… on Robotics and …	ieeexplore.ieee.org	https://ieeexplore.ieee.org/abstract/document/8462891/	https://ieeexplore.ieee.org/abstract/document/8462891/
107	S Sukhbaatar, Z Lin, I Kostrikov, G Synnaeve…	Intrinsic motivation and automatic curricula via asymmetric self-play	2017	arXiv preprint arXiv …	arxiv.org	https://arxiv.org/abs/1703.05407	https://arxiv.org/abs/1703.05407
106	B Fernando, H Bilen, E Gavves…	Self-supervised video representation learning with odd-one-out networks	2017	Proceedings of the …	openaccess.thecvf.com	http://openaccess.thecvf.com/content_cvpr_2017/html/Fernando_Self-Supervised_Video_Representation_CVPR_2017_paper.html	http://openaccess.thecvf.com/content_cvpr_2017/html/Fernando_Self-Supervised_Video_Representation_CVPR_2017_paper.html
103	P Bojanowski, A Joulin	Unsupervised learning by predicting noise	2017	… of the 34th International Conference on …	dl.acm.org	https://dl.acm.org/citation.cfm?id=3305435	https://dl.acm.org/citation.cfm?id=3305435
103	Y Zou, Z Luo, JB Huang	Df-net: Unsupervised joint learning of depth and flow using cross-task consistency	2018	Proceedings of the European …	openaccess.thecvf.com	http://openaccess.thecvf.com/content_ECCV_2018/html/Yuliang_Zou_DF-Net_Unsupervised_Joint_ECCV_2018_paper.html	http://openaccess.thecvf.com/content_ECCV_2018/html/Yuliang_Zou_DF-Net_Unsupervised_Joint_ECCV_2018_paper.html
100	HY Tung, HW Tung, E Yumer…	Self-supervised learning of motion capture	2017	Advances in Neural …	papers.nips.cc	http://papers.nips.cc/paper/7108-self-supervised-learning-of-motion-capture	http://papers.nips.cc/paper/7108-self-supervised-learning-of-motion-capture
95	F Ebert, C Finn, AX Lee, S Levine	Self-supervised visual planning with temporal skip connections	2017	arXiv preprint arXiv:1710.05268	arxiv.org	https://arxiv.org/abs/1710.05268	https://arxiv.org/abs/1710.05268
94	N Yang, R Wang, J Stuckler…	Deep virtual stereo odometry: Leveraging deep depth prediction for monocular direct sparse odometry	2018	Proceedings of the …	openaccess.thecvf.com	http://openaccess.thecvf.com/content_ECCV_2018/html/Nan_Yang_Deep_Virtual_Stereo_ECCV_2018_paper.html	http://openaccess.thecvf.com/content_ECCV_2018/html/Nan_Yang_Deep_Virtual_Stereo_ECCV_2018_paper.html
92	G Kahn, A Villaflor, B Ding, P Abbeel…	Self-supervised deep reinforcement learning with generalized computation graphs for robot navigation	2018	… on Robotics and …	ieeexplore.ieee.org	https://ieeexplore.ieee.org/abstract/document/8460655/	https://ieeexplore.ieee.org/abstract/document/8460655/
90	X Liu, J van de Weijer…	Leveraging unlabeled data for crowd counting by learning to rank	2018	Proceedings of the IEEE …	openaccess.thecvf.com	http://openaccess.thecvf.com/content_cvpr_2018/html/Liu_Leveraging_Unlabeled_Data_CVPR_2018_paper.html	http://openaccess.thecvf.com/content_cvpr_2018/html/Liu_Leveraging_Unlabeled_Data_CVPR_2018_paper.html
90	H Zhao, C Gan, A Rouditchenko…	The sound of pixels	2018	Proceedings of the …	openaccess.thecvf.com	http://openaccess.thecvf.com/content_ECCV_2018/html/Hang_Zhao_The_Sound_of_ECCV_2018_paper.html	http://openaccess.thecvf.com/content_ECCV_2018/html/Hang_Zhao_The_Sound_of_ECCV_2018_paper.html
88	Z Wu, Y Xiong, SX Yu, D Lin	Unsupervised feature learning via non-parametric instance discrimination	2018	Proceedings of the IEEE …	openaccess.thecvf.com	http://openaccess.thecvf.com/content_cvpr_2018/html/Wu_Unsupervised_Feature_Learning_CVPR_2018_paper.html	http://openaccess.thecvf.com/content_cvpr_2018/html/Wu_Unsupervised_Feature_Learning_CVPR_2018_paper.html
88	Y Aytar, T Pfaff, D Budden, T Paine, Z Wang…	Playing hard exploration games by watching youtube	2018	Advances in Neural …	papers.nips.cc	http://papers.nips.cc/paper/7557-playing-hard-exploration-games-by-watching-youtube	http://papers.nips.cc/paper/7557-playing-hard-exploration-games-by-watching-youtube
84	Z Lan, M Chen, S Goodman, K Gimpel…	Albert: A lite bert for self-supervised learning of language representations	2019	arXiv preprint arXiv …	arxiv.org	https://arxiv.org/abs/1909.11942	https://arxiv.org/abs/1909.11942
82	C Li, C Deng, N Li, W Liu, X Gao…	Self-supervised adversarial hashing networks for cross-modal retrieval	2018	Proceedings of the …	openaccess.thecvf.com	http://openaccess.thecvf.com/content_cvpr_2018/html/Li_Self-Supervised_Adversarial_Hashing_CVPR_2018_paper.html	http://openaccess.thecvf.com/content_cvpr_2018/html/Li_Self-Supervised_Adversarial_Hashing_CVPR_2018_paper.html
80	M Huh, A Liu, A Owens…	Fighting fake news: Image splice detection via learned self-consistency	2018	Proceedings of the …	openaccess.thecvf.com	http://openaccess.thecvf.com/content_ECCV_2018/html/Jacob_Huh_Fighting_Fake_News_ECCV_2018_paper.html	http://openaccess.thecvf.com/content_ECCV_2018/html/Jacob_Huh_Fighting_Fake_News_ECCV_2018_paper.html
79	S Brahmbhatt, J Gu, K Kim, J Hays…	Geometry-aware learning of maps for camera localization	2018	Proceedings of the …	openaccess.thecvf.com	http://openaccess.thecvf.com/content_cvpr_2018/html/Brahmbhatt_Geometry-Aware_Learning_of_CVPR_2018_paper.html	http://openaccess.thecvf.com/content_cvpr_2018/html/Brahmbhatt_Geometry-Aware_Learning_of_CVPR_2018_paper.html
78	K Clark, MT Luong, CD Manning, QV Le	Semi-supervised sequence modeling with cross-view training	2018	arXiv preprint arXiv:1809.08370	arxiv.org	https://arxiv.org/abs/1809.08370	https://arxiv.org/abs/1809.08370
77	X Wang, K He, A Gupta	Transitive invariance for self-supervised visual representation learning	2017	Proceedings of the IEEE …	openaccess.thecvf.com	http://openaccess.thecvf.com/content_iccv_2017/html/Wang_Transitive_Invariance_for_ICCV_2017_paper.html	http://openaccess.thecvf.com/content_iccv_2017/html/Wang_Transitive_Invariance_for_ICCV_2017_paper.html
77	C Godard, O Mac Aodha, M Firman…	Digging into self-supervised monocular depth estimation	2019	Proceedings of the …	openaccess.thecvf.com	http://openaccess.thecvf.com/content_ICCV_2019/html/Godard_Digging_Into_Self-Supervised_Monocular_Depth_Estimation_ICCV_2019_paper.html	http://openaccess.thecvf.com/content_ICCV_2019/html/Godard_Digging_Into_Self-Supervised_Monocular_Depth_Estimation_ICCV_2019_paper.html
76	A Nair, D Chen, P Agrawal, P Isola…	Combining self-supervised learning and imitation for vision-based rope manipulation	2017	… on Robotics and …	ieeexplore.ieee.org	https://ieeexplore.ieee.org/abstract/document/7989247/	https://ieeexplore.ieee.org/abstract/document/7989247/
73	A Kolesnikov, X Zhai, L Beyer	Revisiting self-supervised visual representation learning	2019	Proceedings of the IEEE …	openaccess.thecvf.com	http://openaccess.thecvf.com/content_CVPR_2019/html/Kolesnikov_Revisiting_Self-Supervised_Visual_Representation_Learning_CVPR_2019_paper.html	http://openaccess.thecvf.com/content_CVPR_2019/html/Kolesnikov_Revisiting_Self-Supervised_Visual_Representation_Learning_CVPR_2019_paper.html
73	A Tewari, M Zollhöfer, P Garrido…	Self-supervised multi-level face model learning for monocular reconstruction at over 250 hz	2018	Proceedings of the …	openaccess.thecvf.com	http://openaccess.thecvf.com/content_cvpr_2018/html/Tewari_Self-Supervised_Multi-Level_Face_CVPR_2018_paper.html	http://openaccess.thecvf.com/content_cvpr_2018/html/Tewari_Self-Supervised_Multi-Level_Face_CVPR_2018_paper.html
69	B Zhou, D Bau, A Oliva…	Interpreting deep visual representations via network dissection	2018	IEEE transactions on …	ieeexplore.ieee.org	https://ieeexplore.ieee.org/abstract/document/8417924/	https://ieeexplore.ieee.org/abstract/document/8417924/
68	AZ Zhu, L Yuan, K Chaney, K Daniilidis	EV-FlowNet: Self-supervised optical flow estimation for event-based cameras	2018	arXiv preprint arXiv:1802.06898	arxiv.org	https://arxiv.org/abs/1802.06898	https://arxiv.org/abs/1802.06898
67	C Vondrick, A Shrivastava, A Fathi…	Tracking emerges by colorizing videos	2018	Proceedings of the …	openaccess.thecvf.com	http://openaccess.thecvf.com/content_ECCV_2018/html/Carl_Vondrick_Self-supervised_Tracking_by_ECCV_2018_paper.html	http://openaccess.thecvf.com/content_ECCV_2018/html/Carl_Vondrick_Self-supervised_Tracking_by_ECCV_2018_paper.html
65	M Noroozi, A Vinjimoor, P Favaro…	Boosting self-supervised learning via knowledge transfer	2018	Proceedings of the …	openaccess.thecvf.com	http://openaccess.thecvf.com/content_cvpr_2018/html/Noroozi_Boosting_Self-Supervised_Learning_CVPR_2018_paper.html	http://openaccess.thecvf.com/content_cvpr_2018/html/Noroozi_Boosting_Self-Supervised_Learning_CVPR_2018_paper.html
63	AJ Kulkarni, H Shabir	Solving 0–1 knapsack problem using cohort intelligence algorithm	2016	International Journal of Machine Learning and …	Springer	https://link.springer.com/article/10.1007/s13042-014-0272-y	https://link.springer.com/article/10.1007/s13042-014-0272-y
62	Z Ren, Y Jae Lee	Cross-domain self-supervised multi-task feature learning using synthetic imagery	2018	Proceedings of the IEEE Conference on …	openaccess.thecvf.com	http://openaccess.thecvf.com/content_cvpr_2018/html/Ren_Cross-Domain_Self-Supervised_Multi-Task_CVPR_2018_paper.html	http://openaccess.thecvf.com/content_cvpr_2018/html/Ren_Cross-Domain_Self-Supervised_Multi-Task_CVPR_2018_paper.html
61	Y Zhong, Y Dai, H Li	Self-supervised learning for stereo matching with self-improving ability	2017	arXiv preprint arXiv:1709.00930	arxiv.org	https://arxiv.org/abs/1709.00930	https://arxiv.org/abs/1709.00930
61	A Laddha, MK Kocamaz…	Map-supervised road detection	2016	2016 IEEE Intelligent …	ieeexplore.ieee.org	https://ieeexplore.ieee.org/abstract/document/7535374/	https://ieeexplore.ieee.org/abstract/document/7535374/
61	V Cheplygina, M de Bruijne, JPW Pluim	Not-so-supervised: a survey of semi-supervised, multi-instance, and transfer learning in medical image analysis	2019	Medical image analysis	Elsevier	https://www.sciencedirect.com/science/article/pii/S1361841518307588	https://www.sciencedirect.com/science/article/pii/S1361841518307588
58	P Sermanet, C Lynch, J Hsu…	Time-contrastive networks: Self-supervised learning from multi-view observation	2017	2017 IEEE Conference …	ieeexplore.ieee.org	https://ieeexplore.ieee.org/abstract/document/8014803/	https://ieeexplore.ieee.org/abstract/document/8014803/
58	E Shelhamer, P Mahmoudieh, M Argus…	Loss is its own reward: Self-supervision for reinforcement learning	2016	arXiv preprint arXiv …	arxiv.org	https://arxiv.org/abs/1612.07307	https://arxiv.org/abs/1612.07307
57	L Xie, S Wang, A Markham, N Trigoni	Towards monocular vision based obstacle avoidance through deep reinforcement learning	2017	arXiv preprint arXiv:1706.09829	arxiv.org	https://arxiv.org/abs/1706.09829	https://arxiv.org/abs/1706.09829
55	HYF Tung, AW Harley, W Seto…	Adversarial inverse graphics networks: Learning 2d-to-3d lifting and image-to-image translation from unpaired supervision	2017	2017 IEEE International …	ieeexplore.ieee.org	https://ieeexplore.ieee.org/abstract/document/8237729/	https://ieeexplore.ieee.org/abstract/document/8237729/
54	J Lu, D Batra, D Parikh, S Lee	Vilbert: Pretraining task-agnostic visiolinguistic representations for vision-and-language tasks	2019	Advances in Neural Information …	papers.nips.cc	http://papers.nips.cc/paper/8297-vilbert-pretraining-task-agnostic-visiolinguistic-representations-for-vision-and-language-tasks	http://papers.nips.cc/paper/8297-vilbert-pretraining-task-agnostic-visiolinguistic-representations-for-vision-and-language-tasks
53	P Isola, D Zoran, D Krishnan, EH Adelson	Learning visual groups from co-occurrences in space and time	2015	arXiv preprint arXiv …	arxiv.org	https://arxiv.org/abs/1511.06811	https://arxiv.org/abs/1511.06811
53	OJ Hénaff, A Razavi, C Doersch, SM Eslami…	Data-efficient image recognition with contrastive predictive coding	2019	arXiv preprint arXiv …	arxiv.org	https://arxiv.org/abs/1905.09272	https://arxiv.org/abs/1905.09272
52	H Zhang, M Wang, R Hong, TS Chua	Play and rewind: Optimizing binary representations of videos by self-supervised temporal hashing	2016	Proceedings of the 24th ACM …	dl.acm.org	https://dl.acm.org/doi/abs/10.1145/2964284.2964308	https://dl.acm.org/doi/abs/10.1145/2964284.2964308
52	F Ebert, C Finn, S Dasari, A Xie, A Lee…	Visual foresight: Model-based deep reinforcement learning for vision-based robotic control	2018	arXiv preprint arXiv …	arxiv.org	https://arxiv.org/abs/1812.00568	https://arxiv.org/abs/1812.00568
50	C Sun, A Myers, C Vondrick…	Videobert: A joint model for video and language representation learning	2019	Proceedings of the …	openaccess.thecvf.com	http://openaccess.thecvf.com/content_ICCV_2019/html/Sun_VideoBERT_A_Joint_Model_for_Video_and_Language_Representation_Learning_ICCV_2019_paper.html	http://openaccess.thecvf.com/content_ICCV_2019/html/Sun_VideoBERT_A_Joint_Model_for_Video_and_Language_Representation_Learning_ICCV_2019_paper.html
47	C Mitash, KE Bekris, A Boularias	A self-supervised learning system for object detection using physics simulation and multi-view pose estimation	2017	2017 IEEE/RSJ International …	ieeexplore.ieee.org	https://ieeexplore.ieee.org/abstract/document/8202206/	https://ieeexplore.ieee.org/abstract/document/8202206/
47	JYH Ng, J Choi, J Neumann…	Actionflownet: Learning motion representation for action recognition	2018	2018 IEEE Winter …	ieeexplore.ieee.org	https://ieeexplore.ieee.org/abstract/document/8354283/	https://ieeexplore.ieee.org/abstract/document/8354283/
46	L Jing, Y Tian	Self-supervised visual feature learning with deep neural networks: A survey	2019	arXiv preprint arXiv:1902.06162	arxiv.org	https://arxiv.org/abs/1902.06162	https://arxiv.org/abs/1902.06162
46	A Mosavi, AR Varkonyi-Koczy	Integration of machine learning and optimization for robot learning	2017	Recent Global Research and Education …	Springer	https://link.springer.com/chapter/10.1007/978-3-319-46490-9_47	https://link.springer.com/chapter/10.1007/978-3-319-46490-9_47
46	PR Florence, L Manuelli, R Tedrake	Dense object nets: Learning dense visual object descriptors by and for robotic manipulation	2018	arXiv preprint arXiv:1806.08756	arxiv.org	https://arxiv.org/abs/1806.08756	https://arxiv.org/abs/1806.08756
46	K Das, RN Behera	A survey on machine learning: concept, algorithms and applications	2017	International Journal of Innovative …	pdfs.semanticscholar.org	https://pdfs.semanticscholar.org/4d78/55b8e5ef36acd4ac41deef596e67ac899e76.pdf	https://pdfs.semanticscholar.org/4d78/55b8e5ef36acd4ac41deef596e67ac899e76.pdf
45	KM Wurm, H Kretzschmar, R Kümmerle…	Identifying vegetation from laser data in structured outdoor environments	2014	Robotics and …	Elsevier	https://www.sciencedirect.com/science/article/pii/S0921889012001868	https://www.sciencedirect.com/science/article/pii/S0921889012001868
45	A Wang, Y Pruksachatkun, N Nangia…	Superglue: A stickier benchmark for general-purpose language understanding systems	2019	Advances in Neural …	papers.nips.cc	http://papers.nips.cc/paper/8589-superglue-a-stickier-benchmark-for-general-purpose-language-understanding-systems	http://papers.nips.cc/paper/8589-superglue-a-stickier-benchmark-for-general-purpose-language-understanding-systems
44	P Bachman, RD Hjelm, W Buchwalter	Learning representations by maximizing mutual information across views	2019	Advances in Neural …	papers.nips.cc	http://papers.nips.cc/paper/9686-learning-representations-by-maximizing-mutual-information-across-views	http://papers.nips.cc/paper/9686-learning-representations-by-maximizing-mutual-information-across-views
44	Y Wu, Y Lin, X Dong, Y Yan, W Bian…	Progressive learning for person re-identification with one example	2019	IEEE Transactions on …	ieeexplore.ieee.org	https://ieeexplore.ieee.org/abstract/document/8607049/	https://ieeexplore.ieee.org/abstract/document/8607049/
42	MA Lee, Y Zhu, K Srinivasan, P Shah…	Making sense of vision and touch: Self-supervised learning of multimodal representations for contact-rich tasks	2019	… on Robotics and …	ieeexplore.ieee.org	https://ieeexplore.ieee.org/abstract/document/8793485/	https://ieeexplore.ieee.org/abstract/document/8793485/
41	X Zhai, A Oliver, A Kolesnikov…	S4l: Self-supervised semi-supervised learning	2019	Proceedings of the IEEE …	openaccess.thecvf.com	http://openaccess.thecvf.com/content_ICCV_2019/html/Zhai_S4L_Self-Supervised_Semi-Supervised_Learning_ICCV_2019_paper.html	http://openaccess.thecvf.com/content_ICCV_2019/html/Zhai_S4L_Self-Supervised_Semi-Supervised_Learning_ICCV_2019_paper.html
41	L Pinto, J Davidson, A Gupta	Supervision via competition: Robot adversaries for learning tasks	2017	2017 IEEE International …	ieeexplore.ieee.org	https://ieeexplore.ieee.org/abstract/document/7989190/	https://ieeexplore.ieee.org/abstract/document/7989190/
40	T Mar, V Tikhanoff, G Metta…	Self-supervised learning of grasp dependent tool affordances on the iCub Humanoid robot	2015	2015 IEEE International …	ieeexplore.ieee.org	https://ieeexplore.ieee.org/abstract/document/7139640/	https://ieeexplore.ieee.org/abstract/document/7139640/
39	L Gomez, Y Patel, M Rusiñol…	Self-supervised learning of visual features through embedding images into text topic spaces	2017	Proceedings of the …	openaccess.thecvf.com	http://openaccess.thecvf.com/content_cvpr_2017/html/Gomez_Self-Supervised_Learning_of_CVPR_2017_paper.html	http://openaccess.thecvf.com/content_cvpr_2017/html/Gomez_Self-Supervised_Learning_of_CVPR_2017_paper.html
39	M Janner, J Wu, TD Kulkarni, I Yildirim…	Self-supervised intrinsic image decomposition	2017	Advances in Neural …	papers.nips.cc	http://papers.nips.cc/paper/7175-self-supervised-intrinsic-image-decomposition	http://papers.nips.cc/paper/7175-self-supervised-intrinsic-image-decomposition
38	H Li, Y Fan	Non-rigid image registration using self-supervised fully convolutional networks without training data	2018	2018 IEEE 15th International Symposium on …	ieeexplore.ieee.org	https://ieeexplore.ieee.org/abstract/document/8363757/	https://ieeexplore.ieee.org/abstract/document/8363757/
38	S Watanabe, T Hori, J Le Roux…	Student-teacher network learning with enhanced features	2017	2017 IEEE International …	ieeexplore.ieee.org	https://ieeexplore.ieee.org/abstract/document/7953163/	https://ieeexplore.ieee.org/abstract/document/7953163/
38	A Iscen, G Tolias, Y Avrithis…	Label propagation for deep semi-supervised learning	2019	Proceedings of the IEEE …	openaccess.thecvf.com	http://openaccess.thecvf.com/content_CVPR_2019/html/Iscen_Label_Propagation_for_Deep_Semi-Supervised_Learning_CVPR_2019_paper.html	http://openaccess.thecvf.com/content_CVPR_2019/html/Iscen_Label_Propagation_for_Deep_Semi-Supervised_Learning_CVPR_2019_paper.html
38	F Ansari, S Erol, W Sihn	Rethinking Human-Machine Learning in Industry 4.0: How Does the Paradigm Shift Treat the Role of Human Learning?	2018	Procedia manufacturing	Elsevier	https://www.sciencedirect.com/science/article/pii/S235197891830475X	https://www.sciencedirect.com/science/article/pii/S235197891830475X
36	T Nathan Mundhenk, D Ho…	Improvements to context based self-supervised learning	2018	Proceedings of the IEEE …	openaccess.thecvf.com	http://openaccess.thecvf.com/content_cvpr_2018/html/Mundhenk_Improvements_to_Context_CVPR_2018_paper.html	http://openaccess.thecvf.com/content_cvpr_2018/html/Mundhenk_Improvements_to_Context_CVPR_2018_paper.html
36	X Zheng, Y Wang, G Wang, J Liu	Fast and robust segmentation of white blood cell images by self-supervised learning	2018	Micron	Elsevier	https://www.sciencedirect.com/science/article/pii/S0968432817303037	https://www.sciencedirect.com/science/article/pii/S0968432817303037
36	M Kocabas, S Karagoz, E Akbas	Self-supervised learning of 3d human pose using multi-view geometry	2019	Proceedings of the IEEE …	openaccess.thecvf.com	http://openaccess.thecvf.com/content_CVPR_2019/html/Kocabas_Self-Supervised_Learning_of_3D_Human_Pose_Using_Multi-View_Geometry_CVPR_2019_paper.html	http://openaccess.thecvf.com/content_CVPR_2019/html/Kocabas_Self-Supervised_Learning_of_3D_Human_Pose_Using_Multi-View_Geometry_CVPR_2019_paper.html
36	B Korbar, D Tran, L Torresani	Cooperative learning of audio and video models from self-supervised synchronization	2018	Advances in Neural Information …	papers.nips.cc	http://papers.nips.cc/paper/8002-cooperative-learning-of-audio-and-video-models-from-self-supervised-synchronization	http://papers.nips.cc/paper/8002-cooperative-learning-of-audio-and-video-models-from-self-supervised-synchronization
36	FM Carlucci, A D'Innocente, S Bucci…	Domain generalization by solving jigsaw puzzles	2019	Proceedings of the …	openaccess.thecvf.com	http://openaccess.thecvf.com/content_CVPR_2019/html/Carlucci_Domain_Generalization_by_Solving_Jigsaw_Puzzles_CVPR_2019_paper.html	http://openaccess.thecvf.com/content_CVPR_2019/html/Carlucci_Domain_Generalization_by_Solving_Jigsaw_Puzzles_CVPR_2019_paper.html
35	X Wang, A Jabri, AA Efros	Learning correspondence from the cycle-consistency of time	2019	Proceedings of the IEEE …	openaccess.thecvf.com	http://openaccess.thecvf.com/content_CVPR_2019/html/Wang_Learning_Correspondence_From_the_Cycle-Consistency_of_Time_CVPR_2019_paper.html	http://openaccess.thecvf.com/content_CVPR_2019/html/Wang_Learning_Correspondence_From_the_Cycle-Consistency_of_Time_CVPR_2019_paper.html
34	S Pillai, R Ambruş, A Gaidon	Superdepth: Self-supervised, super-resolved monocular depth estimation	2019	2019 International Conference …	ieeexplore.ieee.org	https://ieeexplore.ieee.org/abstract/document/8793621/	https://ieeexplore.ieee.org/abstract/document/8793621/
34	J Donahue, K Simonyan	Large scale adversarial representation learning	2019	Advances in Neural Information …	papers.nips.cc	http://papers.nips.cc/paper/9240-large-scale-adversarial-representation-learning	http://papers.nips.cc/paper/9240-large-scale-adversarial-representation-learning
34	R Santa Cruz, B Fernando…	Deeppermnet: Visual permutation learning	2017	Proceedings of the …	openaccess.thecvf.com	http://openaccess.thecvf.com/content_cvpr_2017/html/Santa_Cruz_DeepPermNet_Visual_Permutation_CVPR_2017_paper.html	http://openaccess.thecvf.com/content_cvpr_2017/html/Santa_Cruz_DeepPermNet_Visual_Permutation_CVPR_2017_paper.html
34	K Fang, Y Zhu, A Garg, A Kurenkov…	Learning task-oriented grasping for tool manipulation from simulated self-supervision	2020	… Journal of Robotics …	journals.sagepub.com	https://journals.sagepub.com/doi/abs/10.1177/0278364919872545	https://journals.sagepub.com/doi/abs/10.1177/0278364919872545
33	Y Tian, X Peng, L Zhao, S Zhang…	CR-GAN: learning complete representations for multi-view generation	2018	arXiv preprint arXiv …	arxiv.org	https://arxiv.org/abs/1806.11191	https://arxiv.org/abs/1806.11191
33	A Koppel, G Warnell, E Stump…	D4l: Decentralized dynamic discriminative dictionary learning	2017	IEEE Transactions on …	ieeexplore.ieee.org	https://ieeexplore.ieee.org/abstract/document/7839296/	https://ieeexplore.ieee.org/abstract/document/7839296/
32	P Goyal, D Mahajan, A Gupta…	Scaling and benchmarking self-supervised visual representation learning	2019	Proceedings of the IEEE …	openaccess.thecvf.com	http://openaccess.thecvf.com/content_ICCV_2019/html/Goyal_Scaling_and_Benchmarking_Self-Supervised_Visual_Representation_Learning_ICCV_2019_paper.html	http://openaccess.thecvf.com/content_ICCV_2019/html/Goyal_Scaling_and_Benchmarking_Self-Supervised_Visual_Representation_Learning_ICCV_2019_paper.html
32	C Gan, B Gong, K Liu, H Su…	Geometry guided convolutional neural networks for self-supervised video representation learning	2018	Proceedings of the …	openaccess.thecvf.com	http://openaccess.thecvf.com/content_cvpr_2018/html/Gan_Geometry_Guided_Convolutional_CVPR_2018_paper.html	http://openaccess.thecvf.com/content_cvpr_2018/html/Gan_Geometry_Guided_Convolutional_CVPR_2018_paper.html
32	K Otsu, M Ono, TJ Fuchs, I Baldwin…	Autonomous terrain classification with co-and self-training approach	2016	IEEE Robotics and …	ieeexplore.ieee.org	https://ieeexplore.ieee.org/abstract/document/7397920/	https://ieeexplore.ieee.org/abstract/document/7397920/
31	A Masood, A Al-Jumaily, K Anam	Self-supervised learning model for skin cancer diagnosis	2015	2015 7th International IEEE …	ieeexplore.ieee.org	https://ieeexplore.ieee.org/abstract/document/7146798/	https://ieeexplore.ieee.org/abstract/document/7146798/
31	Y Chen, X Zhu, S Gong	Deep association learning for unsupervised video person re-identification	2018	arXiv preprint arXiv:1808.07301	arxiv.org	https://arxiv.org/abs/1808.07301	https://arxiv.org/abs/1808.07301
30	D Cho, J Park, TH Oh, YW Tai…	Weakly-and self-supervised learning for content-aware deep image retargeting	2017	Proceedings of the …	openaccess.thecvf.com	http://openaccess.thecvf.com/content_iccv_2017/html/Cho_Weakly-_and_Self-Supervised_ICCV_2017_paper.html	http://openaccess.thecvf.com/content_iccv_2017/html/Cho_Weakly-_and_Self-Supervised_ICCV_2017_paper.html
30	A Milella, G Reina, J Underwood	A self‐learning framework for statistical ground classification using radar and monocular vision	2015	Journal of Field Robotics	Wiley Online Library	https://onlinelibrary.wiley.com/doi/abs/10.1002/rob.21512	https://onlinelibrary.wiley.com/doi/abs/10.1002/rob.21512
30	M Jung, J Hwang, J Tani	Self-organization of spatio-temporal hierarchy via learning of dynamic visual image patterns on action sequences	2015	PloS one	ncbi.nlm.nih.gov	https://www.ncbi.nlm.nih.gov/pmc/articles/PMC4492609/	https://www.ncbi.nlm.nih.gov/pmc/articles/PMC4492609/
29	S Jenni, P Favaro	Self-supervised feature learning by learning to spot artifacts	2018	Proceedings of the IEEE Conference on …	openaccess.thecvf.com	http://openaccess.thecvf.com/content_cvpr_2018/html/Jenni_Self-Supervised_Feature_Learning_CVPR_2018_paper.html	http://openaccess.thecvf.com/content_cvpr_2018/html/Jenni_Self-Supervised_Feature_Learning_CVPR_2018_paper.html
29	P Liu, M Lyu, I King, J Xu	Selflow: Self-supervised learning of optical flow	2019	Proceedings of the IEEE …	openaccess.thecvf.com	http://openaccess.thecvf.com/content_CVPR_2019/html/Liu_SelFlow_Self-Supervised_Learning_of_Optical_Flow_CVPR_2019_paper.html	http://openaccess.thecvf.com/content_CVPR_2019/html/Liu_SelFlow_Self-Supervised_Learning_of_Optical_Flow_CVPR_2019_paper.html
29	T Jakab, A Gupta, H Bilen, A Vedaldi	Unsupervised learning of object landmarks through conditional image generation	2018	Advances in Neural …	papers.nips.cc	http://papers.nips.cc/paper/7657-unsupervised-learning-of-object-landmarks-through-conditional-image-generation	http://papers.nips.cc/paper/7657-unsupervised-learning-of-object-landmarks-through-conditional-image-generation
28	L Zhang, GJ Qi, L Wang, J Luo	Aet vs. aed: Unsupervised representation learning by auto-encoding transformations rather than data	2019	Proceedings of the IEEE …	openaccess.thecvf.com	http://openaccess.thecvf.com/content_CVPR_2019/html/Zhang_AET_vs.html	http://openaccess.thecvf.com/content_CVPR_2019/html/Zhang_AET_vs.html
27	T Chen, X Zhai, M Ritter, M Lucic…	Self-supervised gans via auxiliary rotation loss	2019	Proceedings of the …	openaccess.thecvf.com	http://openaccess.thecvf.com/content_CVPR_2019/html/Chen_Self-Supervised_GANs_via_Auxiliary_Rotation_Loss_CVPR_2019_paper.html	http://openaccess.thecvf.com/content_CVPR_2019/html/Chen_Self-Supervised_GANs_via_Auxiliary_Rotation_Loss_CVPR_2019_paper.html
27	N Haber, D Mrowca, S Wang, LF Fei-Fei…	Learning to play with intrinsically-motivated, self-aware agents	2018	Advances in Neural …	papers.nips.cc	http://papers.nips.cc/paper/8059-learning-to-play-with-intrinsically-motivated-self-aware-agents	http://papers.nips.cc/paper/8059-learning-to-play-with-intrinsically-motivated-self-aware-agents
26	O Wiles, A Koepke, A Zisserman	Self-supervised learning of a facial attribute embedding from video	2018	arXiv preprint arXiv:1808.06882	arxiv.org	https://arxiv.org/abs/1808.06882	https://arxiv.org/abs/1808.06882
26	Y Zhang, S Khamis, C Rhemann…	Activestereonet: End-to-end self-supervised learning for active stereo systems	2018	Proceedings of the …	openaccess.thecvf.com	http://openaccess.thecvf.com/content_ECCV_2018/html/Yinda_Zhang_Active_Stereo_Net_ECCV_2018_paper.html	http://openaccess.thecvf.com/content_ECCV_2018/html/Yinda_Zhang_Active_Stereo_Net_ECCV_2018_paper.html
26	D Hendrycks, M Mazeika, S Kadavath…	Using self-supervised learning can improve model robustness and uncertainty	2019	Advances in Neural …	papers.nips.cc	http://papers.nips.cc/paper/9697-using-self-supervised-learning-can-improve-model-robustness-and-uncertainty	http://papers.nips.cc/paper/9697-using-self-supervised-learning-can-improve-model-robustness-and-uncertainty
26	B Lee, K Daniilidis, DD Lee	Online self-supervised monocular visual odometry for ground vehicles	2015	2015 IEEE International …	ieeexplore.ieee.org	https://ieeexplore.ieee.org/abstract/document/7139928/	https://ieeexplore.ieee.org/abstract/document/7139928/
26	B Brattoli, U Buchler, AS Wahl…	Lstm self-supervision for detailed behavior analysis	2017	Proceedings of the …	openaccess.thecvf.com	http://openaccess.thecvf.com/content_cvpr_2017/html/Brattoli_LSTM_Self-Supervision_for_CVPR_2017_paper.html	http://openaccess.thecvf.com/content_cvpr_2017/html/Brattoli_LSTM_Self-Supervision_for_CVPR_2017_paper.html
26	A Nagrani, S Albanie…	Learnable pins: Cross-modal embeddings for person identity	2018	Proceedings of the …	openaccess.thecvf.com	http://openaccess.thecvf.com/content_ECCV_2018/html/Samuel_Albanie_Learnable_PINs_Cross-Modal_ECCV_2018_paper.html	http://openaccess.thecvf.com/content_ECCV_2018/html/Samuel_Albanie_Learnable_PINs_Cross-Modal_ECCV_2018_paper.html
26	O Kulkarni, N Kulkarni, AJ Kulkarni…	Constrained cohort intelligence using static and dynamic penalty function approach for mechanical components design	2018	International Journal of …	Taylor & Francis	https://www.tandfonline.com/doi/abs/10.1080/17445760.2016.1242728	https://www.tandfonline.com/doi/abs/10.1080/17445760.2016.1242728
25	F Ebert, S Dasari, AX Lee, S Levine, C Finn	Robustness via retrying: Closed-loop robotic manipulation with self-supervised learning	2018	arXiv preprint arXiv …	arxiv.org	https://arxiv.org/abs/1810.03043	https://arxiv.org/abs/1810.03043
25	D Kim, D Cho, IS Kweon	Self-supervised video representation learning with space-time cubic puzzles	2019	Proceedings of the AAAI Conference on Artificial …	aaai.org	https://www.aaai.org/ojs/index.php/AAAI/article/view/4873	https://www.aaai.org/ojs/index.php/AAAI/article/view/4873
25	L Jin, J Lazarow, Z Tu	Introspective classification with convolutional nets	2017	Advances in Neural Information Processing …	papers.nips.cc	http://papers.nips.cc/paper/6684-introspective-classification-with-convolutional-nets	http://papers.nips.cc/paper/6684-introspective-classification-with-convolutional-nets
25	A Milella, G Reina, J Underwood, B Douillard	Visual ground segmentation by radar supervision	2014	Robotics and Autonomous …	Elsevier	https://www.sciencedirect.com/science/article/pii/S0921889012001789	https://www.sciencedirect.com/science/article/pii/S0921889012001789
25	C Qin, W Bai, J Schlemper, SE Petersen…	Joint learning of motion estimation and segmentation for cardiac MR image sequences	2018	… Conference on Medical …	Springer	https://link.springer.com/chapter/10.1007/978-3-030-00934-2_53	https://link.springer.com/chapter/10.1007/978-3-030-00934-2_53
25	A Gupta, A Murali, DP Gandhi, L Pinto	Robot learning in homes: Improving generalization and reducing dataset bias	2018	Advances in Neural …	papers.nips.cc	http://papers.nips.cc/paper/8123-robot-learning-in-homes-improving-generalization-and-reducing-dataset-bias	http://papers.nips.cc/paper/8123-robot-learning-in-homes-improving-generalization-and-reducing-dataset-bias
24	X Liu, J van de Weijer…	Exploiting unlabeled data in cnns by self-supervised learning to rank	2019	IEEE transactions on …	ieeexplore.ieee.org	https://ieeexplore.ieee.org/abstract/document/8642842/	https://ieeexplore.ieee.org/abstract/document/8642842/
24	H Jiang, G Larsson…	Self-supervised relative depth learning for urban scene understanding	2018	Proceedings of the …	openaccess.thecvf.com	http://openaccess.thecvf.com/content_ECCV_2018/html/Huaizu_Jiang_Self-Supervised_Relative_Depth_ECCV_2018_paper.html	http://openaccess.thecvf.com/content_ECCV_2018/html/Huaizu_Jiang_Self-Supervised_Relative_Depth_ECCV_2018_paper.html
24	D Kim, D Cho, D Yoo, IS Kweon	Learning image representations by completing damaged jigsaw puzzles	2018	2018 IEEE Winter …	ieeexplore.ieee.org	https://ieeexplore.ieee.org/abstract/document/8354196/	https://ieeexplore.ieee.org/abstract/document/8354196/
24	AD Edwards, H Sahni, Y Schroecker…	Imitating latent policies from observation	2018	arXiv preprint arXiv …	arxiv.org	https://arxiv.org/abs/1805.07914	https://arxiv.org/abs/1805.07914
23	H Chen, J Gu, O Gallo, MY Liu…	Reblur2deblur: Deblurring videos via self-supervised learning	2018	2018 IEEE …	ieeexplore.ieee.org	https://ieeexplore.ieee.org/abstract/document/8368468/	https://ieeexplore.ieee.org/abstract/document/8368468/
23	Y Li, L Yuan, N Vasconcelos	Bidirectional learning for domain adaptation of semantic segmentation	2019	Proceedings of the IEEE …	openaccess.thecvf.com	http://openaccess.thecvf.com/content_CVPR_2019/html/Li_Bidirectional_Learning_for_Domain_Adaptation_of_Semantic_Segmentation_CVPR_2019_paper.html	http://openaccess.thecvf.com/content_CVPR_2019/html/Li_Bidirectional_Learning_for_Domain_Adaptation_of_Semantic_Segmentation_CVPR_2019_paper.html
23	M Tschentscher, C Koch, M König…	Scalable real-time parking lot classification: An evaluation of image features and supervised learning algorithms	2015	… Joint Conference on …	ieeexplore.ieee.org	https://ieeexplore.ieee.org/abstract/document/7280319/	https://ieeexplore.ieee.org/abstract/document/7280319/
23	A Díaz Mujica, MV Pérez Villalobos…	Impacto de un entrenamiento en aprendizaje autorregulado en estudiantes universitarios	2017	Perfiles …	scielo.org.mx	http://www.scielo.org.mx/scielo.php?script=sci_arttext&pid=S0185-26982017000300087	http://www.scielo.org.mx/scielo.php?script=sci_arttext&pid=S0185-26982017000300087
22	D Novotny, S Albanie, D Larlus…	Self-supervised learning of geometrically stable features through probabilistic introspection	2018	Proceedings of the …	openaccess.thecvf.com	http://openaccess.thecvf.com/content_cvpr_2018/html/Novotny_Self-Supervised_Learning_of_CVPR_2018_paper.html	http://openaccess.thecvf.com/content_cvpr_2018/html/Novotny_Self-Supervised_Learning_of_CVPR_2018_paper.html
22	F Hu, Z Shao, T Ruan	Self-supervised chinese ontology learning from online encyclopedias	2014	The scientific world journal	hindawi.com	https://www.hindawi.com/journals/tswj/2014/848631/abs/	https://www.hindawi.com/journals/tswj/2014/848631/abs/
22	Y Sun, Q Xu, Y Li, C Zhang, Y Li…	Perceive where to focus: Learning visibility-aware part-level features for partial person re-identification	2019	Proceedings of the …	openaccess.thecvf.com	http://openaccess.thecvf.com/content_CVPR_2019/html/Sun_Perceive_Where_to_Focus_Learning_Visibility-Aware_Part-Level_Features_for_Partial_CVPR_2019_paper.html	http://openaccess.thecvf.com/content_CVPR_2019/html/Sun_Perceive_Where_to_Focus_Learning_Visibility-Aware_Part-Level_Features_for_Partial_CVPR_2019_paper.html
21	T Ross, D Zimmerer, A Vemuri, F Isensee…	Exploiting the potential of unlabeled endoscopic video data with self-supervised learning	2018	International journal of …	Springer	https://link.springer.com/article/10.1007/s11548-018-1772-0	https://link.springer.com/article/10.1007/s11548-018-1772-0
21	U Buchler, B Brattoli, B Ommer	Improving spatiotemporal self-supervision by deep reinforcement learning	2018	Proceedings of the …	openaccess.thecvf.com	http://openaccess.thecvf.com/content_ECCV_2018/html/Uta_Buchler_Improving_Spatiotemporal_Self-Supervision_ECCV_2018_paper.html	http://openaccess.thecvf.com/content_ECCV_2018/html/Uta_Buchler_Improving_Spatiotemporal_Self-Supervision_ECCV_2018_paper.html
21	F Tosi, F Aleotti, M Poggi…	Learning monocular depth estimation infusing traditional stereo knowledge	2019	Proceedings of the IEEE …	openaccess.thecvf.com	http://openaccess.thecvf.com/content_CVPR_2019/html/Tosi_Learning_Monocular_Depth_Estimation_Infusing_Traditional_Stereo_Knowledge_CVPR_2019_paper.html	http://openaccess.thecvf.com/content_CVPR_2019/html/Tosi_Learning_Monocular_Depth_Estimation_Infusing_Traditional_Stereo_Knowledge_CVPR_2019_paper.html
20	M Ye, E Johns, A Handa, L Zhang, P Pratt…	Self-supervised siamese learning on stereo image pairs for depth estimation in robotic surgery	2017	arXiv preprint arXiv …	arxiv.org	https://arxiv.org/abs/1705.08260	https://arxiv.org/abs/1705.08260
20	A Mosavi, A Varkonyi	Learning in robotics	2017	International Journal of Computer …	eprints.qut.edu.au	https://eprints.qut.edu.au/127556/	https://eprints.qut.edu.au/127556/
20	S Gidaris, A Bursuc, N Komodakis…	Boosting few-shot visual learning with self-supervision	2019	Proceedings of the …	openaccess.thecvf.com	http://openaccess.thecvf.com/content_ICCV_2019/html/Gidaris_Boosting_Few-Shot_Visual_Learning_With_Self-Supervision_ICCV_2019_paper.html	http://openaccess.thecvf.com/content_ICCV_2019/html/Gidaris_Boosting_Few-Shot_Visual_Learning_With_Self-Supervision_ICCV_2019_paper.html
20	S Pillai, JJ Leonard	Towards visual ego-motion learning in robots	2017	… on Intelligent Robots and Systems (IROS)	ieeexplore.ieee.org	https://ieeexplore.ieee.org/abstract/document/8206441/	https://ieeexplore.ieee.org/abstract/document/8206441/
20	L Metz, N Maheswaranathan…	Learning unsupervised learning rules	2018	arXiv preprint arXiv …	pdfs.semanticscholar.org	https://pdfs.semanticscholar.org/790e/d6ea87e8b7500d6d2e6f36e02d71bb87a98d.pdf	https://pdfs.semanticscholar.org/790e/d6ea87e8b7500d6d2e6f36e02d71bb87a98d.pdf
18	S Pascual, M Ravanelli, J Serrà, A Bonafonte…	Learning problem-agnostic speech representations from multiple self-supervised tasks	2019	arXiv preprint arXiv …	arxiv.org	https://arxiv.org/abs/1904.03416	https://arxiv.org/abs/1904.03416
18	SH Lee, DH Kim, BC Song	Self-supervised knowledge distillation using singular value decomposition	2018	European Conference on Computer Vision	Springer	https://link.springer.com/chapter/10.1007/978-3-030-01231-1_21	https://link.springer.com/chapter/10.1007/978-3-030-01231-1_21
18	Z Feng, C Xu, D Tao	Self-supervised representation learning by rotation feature decoupling	2019	… of the IEEE Conference on Computer …	openaccess.thecvf.com	http://openaccess.thecvf.com/content_CVPR_2019/html/Feng_Self-Supervised_Representation_Learning_by_Rotation_Feature_Decoupling_CVPR_2019_paper.html	http://openaccess.thecvf.com/content_CVPR_2019/html/Feng_Self-Supervised_Representation_Learning_by_Rotation_Feature_Decoupling_CVPR_2019_paper.html
18	G Yengera, D Mutter, J Marescaux, N Padoy	Less is more: Surgical phase recognition with less annotations through self-supervised pre-training of CNN-LSTM networks	2018	arXiv preprint arXiv …	arxiv.org	https://arxiv.org/abs/1805.08569	https://arxiv.org/abs/1805.08569
18	C Sun, F Baradel, K Murphy, C Schmid	Contrastive bidirectional transformer for temporal representation learning	2019	arXiv preprint arXiv:1906.05743	arxiv.org	https://arxiv.org/abs/1906.05743	https://arxiv.org/abs/1906.05743
17	A Murali, L Pinto, D Gandhi…	CASSL: Curriculum accelerated self-supervised learning	2018	2018 IEEE International …	ieeexplore.ieee.org	https://ieeexplore.ieee.org/abstract/document/8463147/	https://ieeexplore.ieee.org/abstract/document/8463147/
17	WP Sanberg, G Dubbleman	Free-space detection with self-supervised and online trained fully convolutional networks	2017	Electronic Imaging	ingentaconnect.com	https://www.ingentaconnect.com/content/ist/ei/2017/00002017/00000019/art00010	https://www.ingentaconnect.com/content/ist/ei/2017/00002017/00000019/art00010
17	A Gogna, A Majumdar	Semi supervised autoencoder	2016	International Conference on Neural Information …	Springer	https://link.springer.com/chapter/10.1007/978-3-319-46672-9_10	https://link.springer.com/chapter/10.1007/978-3-319-46672-9_10
17	C Ye, A Mitrokhin, C Fermüller, JA Yorke…	Unsupervised learning of dense optical flow, depth and egomotion from sparse event data	2018	arXiv preprint arXiv …	arxiv.org	https://arxiv.org/abs/1809.08625	https://arxiv.org/abs/1809.08625
17	Y Wang, L Jiang, MH Yang, LJ Li, M Long, L Fei-Fei	Eidetic 3d lstm: A model for video prediction and beyond	2018		openreview.net	https://openreview.net/forum?id=B1lKS2AqtX	https://openreview.net/forum?id=B1lKS2AqtX
16	J Baleia, P Santana, J Barata	On exploiting haptic cues for self-supervised learning of depth-based robot navigation affordances	2015	Journal of Intelligent & Robotic Systems	Springer	https://link.springer.com/article/10.1007/s10846-015-0184-4	https://link.springer.com/article/10.1007/s10846-015-0184-4
16	L Jing, Y Tian	Self-supervised spatiotemporal feature learning by video geometric transformations	2018	arXiv preprint arXiv:1811.11387	pdfs.semanticscholar.org	https://pdfs.semanticscholar.org/3eb9/f4ca21bd104b1d9963a5a74e0ad48a1a1bdf.pdf	https://pdfs.semanticscholar.org/3eb9/f4ca21bd104b1d9963a5a74e0ad48a1a1bdf.pdf
16	F Hu, Z Shao, T Ruan	Self-supervised synonym extraction from the web.	2015	J. Inf. Sci. Eng.	iis.sinica.edu.tw	http://www.iis.sinica.edu.tw/page/jise/2015/201505_20.pdf	http://www.iis.sinica.edu.tw/page/jise/2015/201505_20.pdf
16	VH Pong, M Dalal, S Lin, A Nair, S Bahl…	Skew-fit: State-covering self-supervised reinforcement learning	2019	arXiv preprint arXiv …	arxiv.org	https://arxiv.org/abs/1903.03698	https://arxiv.org/abs/1903.03698
16	N Sayed, B Brattoli, B Ommer	Cross and learn: Cross-modal self-supervision	2018	German Conference on Pattern …	Springer	https://link.springer.com/chapter/10.1007/978-3-030-12939-2_17	https://link.springer.com/chapter/10.1007/978-3-030-12939-2_17
16	K Wang, X Yan, D Zhang…	Towards human-machine cooperation: Self-supervised sample mining for object detection	2018	Proceedings of the …	openaccess.thecvf.com	http://openaccess.thecvf.com/content_cvpr_2018/html/Wang_Towards_Human-Machine_Cooperation_CVPR_2018_paper.html	http://openaccess.thecvf.com/content_cvpr_2018/html/Wang_Towards_Human-Machine_Cooperation_CVPR_2018_paper.html
16	D Xu, J Xiao, Z Zhao, J Shao, D Xie…	Self-supervised spatiotemporal learning via video clip order prediction	2019	Proceedings of the …	openaccess.thecvf.com	http://openaccess.thecvf.com/content_CVPR_2019/html/Xu_Self-Supervised_Spatiotemporal_Learning_via_Video_Clip_Order_Prediction_CVPR_2019_paper.html	http://openaccess.thecvf.com/content_CVPR_2019/html/Xu_Self-Supervised_Spatiotemporal_Learning_via_Video_Clip_Order_Prediction_CVPR_2019_paper.html
16	R Aljundi, K Kelchtermans…	Task-free continual learning	2019	Proceedings of the …	openaccess.thecvf.com	http://openaccess.thecvf.com/content_CVPR_2019/html/Aljundi_Task-Free_Continual_Learning_CVPR_2019_paper.html	http://openaccess.thecvf.com/content_CVPR_2019/html/Aljundi_Task-Free_Continual_Learning_CVPR_2019_paper.html
16	X Xu, H Lu, J Song, Y Yang…	Ternary adversarial networks with self-supervision for zero-shot cross-modal retrieval	2019	IEEE transactions on …	ieeexplore.ieee.org	https://ieeexplore.ieee.org/abstract/document/8771379/	https://ieeexplore.ieee.org/abstract/document/8771379/
16	BG Weinstein, S Marconi, S Bohlman, A Zare, E White	Individual tree-crown detection in RGB imagery using semi-supervised deep learning neural networks	2019	Remote Sensing	mdpi.com	https://www.mdpi.com/2072-4292/11/11/1309	https://www.mdpi.com/2072-4292/11/11/1309
16	J Hawke, C Gurău, CH Tong, I Posner	Wrong today, right tomorrow: Experience-based classification for robot perception	2016	Field and Service Robotics	Springer	https://link.springer.com/chapter/10.1007/978-3-319-27702-8_12	https://link.springer.com/chapter/10.1007/978-3-319-27702-8_12
16	M Caron, P Bojanowski, J Mairal…	Unsupervised pre-training of image features on non-curated data	2019	Proceedings of the …	openaccess.thecvf.com	http://openaccess.thecvf.com/content_ICCV_2019/html/Caron_Unsupervised_Pre-Training_of_Image_Features_on_Non-Curated_Data_ICCV_2019_paper.html	http://openaccess.thecvf.com/content_ICCV_2019/html/Caron_Unsupervised_Pre-Training_of_Image_Features_on_Non-Curated_Data_ICCV_2019_paper.html
16	M Sabokrou, M Pourreza, M Fayyaz, R Entezari…	Avid: Adversarial visual irregularity detection	2018	Asian Conference on …	Springer	https://link.springer.com/chapter/10.1007/978-3-030-20876-9_31	https://link.springer.com/chapter/10.1007/978-3-030-20876-9_31
16	J Cramer, HH Wu, J Salamon…	Look, listen, and learn more: Design choices for deep audio embeddings	2019	ICASSP 2019-2019 IEEE …	ieeexplore.ieee.org	https://ieeexplore.ieee.org/abstract/document/8682475/	https://ieeexplore.ieee.org/abstract/document/8682475/
16	C Lynch, M Khansari, T Xiao, V Kumar…	Learning latent plans from play	2019	arXiv preprint arXiv …	arxiv.org	https://arxiv.org/abs/1903.01973	https://arxiv.org/abs/1903.01973
16	N Dvornik, C Schmid, J Mairal	Diversity with cooperation: Ensemble methods for few-shot classification	2019	Proceedings of the IEEE …	openaccess.thecvf.com	http://openaccess.thecvf.com/content_ICCV_2019/html/Dvornik_Diversity_With_Cooperation_Ensemble_Methods_for_Few-Shot_Classification_ICCV_2019_paper.html	http://openaccess.thecvf.com/content_ICCV_2019/html/Dvornik_Diversity_With_Cooperation_Ensemble_Methods_for_Few-Shot_Classification_ICCV_2019_paper.html
15	X Liu, A Sinha, M Unberath, M Ishii, GD Hager…	Self-supervised learning for dense depth estimation in monocular endoscopy	2018	OR 2.0 Context-Aware …	Springer	https://link.springer.com/chapter/10.1007/978-3-030-01201-4_15	https://link.springer.com/chapter/10.1007/978-3-030-01201-4_15
15	P Morgado, N Nvasconcelos, T Langlois…	Self-supervised generation of spatial audio for 360 video	2018	Advances in Neural …	papers.nips.cc	http://papers.nips.cc/paper/7319-self-supervised-generation-of-spatial-audio-for-360-video	http://papers.nips.cc/paper/7319-self-supervised-generation-of-spatial-audio-for-360-video
15	T Han, W Xie, A Zisserman	Video representation learning by dense predictive coding	2019	Proceedings of the IEEE …	openaccess.thecvf.com	http://openaccess.thecvf.com/content_ICCVW_2019/html/HVU/Han_Video_Representation_Learning_by_Dense_Predictive_Coding_ICCVW_2019_paper.html	http://openaccess.thecvf.com/content_ICCVW_2019/html/HVU/Han_Video_Representation_Learning_by_Dense_Predictive_Coding_ICCVW_2019_paper.html
15	X Shen, AA Efros, M Aubry	Discovering visual patterns in art collections with spatially-consistent feature learning	2019	Proceedings of the IEEE …	openaccess.thecvf.com	http://openaccess.thecvf.com/content_CVPR_2019/html/Shen_Discovering_Visual_Patterns_in_Art_Collections_With_Spatially-Consistent_Feature_Learning_CVPR_2019_paper.html	http://openaccess.thecvf.com/content_CVPR_2019/html/Shen_Discovering_Visual_Patterns_in_Art_Collections_With_Spatially-Consistent_Feature_Learning_CVPR_2019_paper.html
15	A Xie, F Ebert, S Levine, C Finn	Improvisation through physical understanding: Using novel objects as tools with visual foresight	2019	arXiv preprint arXiv:1904.05538	arxiv.org	https://arxiv.org/abs/1904.05538	https://arxiv.org/abs/1904.05538
15	R Gao, K Grauman	2.5 d visual sound	2019	… of the IEEE Conference on Computer …	openaccess.thecvf.com	http://openaccess.thecvf.com/content_CVPR_2019/html/Gao_2.html	http://openaccess.thecvf.com/content_CVPR_2019/html/Gao_2.html
15	Y LeCun	1.1 Deep Learning Hardware: Past, Present, and Future	2019	2019 IEEE International Solid-State Circuits …	ieeexplore.ieee.org	https://ieeexplore.ieee.org/abstract/document/8662396/	https://ieeexplore.ieee.org/abstract/document/8662396/
14	K Wang, L Lin, C Jiang, C Qian…	3D human pose machines with self-supervised learning	2019	IEEE transactions on …	ieeexplore.ieee.org	https://ieeexplore.ieee.org/abstract/document/8611195/	https://ieeexplore.ieee.org/abstract/document/8611195/
14	C Senaras, FTY Vural	A self-supervised decision fusion framework for building detection	2015	IEEE Journal of Selected Topics in …	ieeexplore.ieee.org	https://ieeexplore.ieee.org/abstract/document/7185338/	https://ieeexplore.ieee.org/abstract/document/7185338/
14	WP Sanberg, G Dubbelman…	Extending the stixel world with online self-supervised color modeling for road-versus-obstacle segmentation	2014	17th International IEEE …	ieeexplore.ieee.org	https://ieeexplore.ieee.org/abstract/document/6957883/	https://ieeexplore.ieee.org/abstract/document/6957883/
14	F Tosi, M Poggi, S Mattoccia, A Tonioni, L di Stefano	Learning confidence measures in the wild.	2017	BMVC	vision.disi.unibo.it	https://vision.disi.unibo.it/~mpoggi/papers/bmvc2017.pdf	https://vision.disi.unibo.it/~mpoggi/papers/bmvc2017.pdf
14	A Wang, T Kurutach, K Liu, P Abbeel…	Learning robotic manipulation through visual planning and acting	2019	arXiv preprint arXiv …	arxiv.org	https://arxiv.org/abs/1905.04411	https://arxiv.org/abs/1905.04411
14	WC Ma, H Chu, B Zhou, R Urtasun…	Single image intrinsic decomposition without a single intrinsic image	2018	Proceedings of the …	openaccess.thecvf.com	http://openaccess.thecvf.com/content_ECCV_2018/html/Wei-Chiu_Single_Image_Intrinsic_ECCV_2018_paper.html	http://openaccess.thecvf.com/content_ECCV_2018/html/Wei-Chiu_Single_Image_Intrinsic_ECCV_2018_paper.html
14	A Amini, W Schwarting, G Rosman…	Variational autoencoder for end-to-end control of autonomous driving with novelty detection and training de-biasing	2018	2018 IEEE/RSJ …	ieeexplore.ieee.org	https://ieeexplore.ieee.org/abstract/document/8594386/	https://ieeexplore.ieee.org/abstract/document/8594386/
14	M Rolf, M Asada	Autonomous development of goals: From generic rewards to goal and self detection	2014	… on Development and Learning and on …	ieeexplore.ieee.org	https://ieeexplore.ieee.org/abstract/document/6982980/	https://ieeexplore.ieee.org/abstract/document/6982980/
14	M Merler, D Joshi, QB Nguyen…	Automatic curation of golf highlights using multimodal excitement features	2017	… IEEE Conference on …	ieeexplore.ieee.org	https://ieeexplore.ieee.org/abstract/document/8014748/	https://ieeexplore.ieee.org/abstract/document/8014748/
13	A Jamaludin, T Kadir, A Zisserman	Self-supervised learning for spinal MRIs	2017	Deep Learning in Medical Image …	Springer	https://link.springer.com/chapter/10.1007/978-3-319-67558-9_34	https://link.springer.com/chapter/10.1007/978-3-319-67558-9_34
13	HW Ho, C De Wagter, BDW Remes…	Optical-flow based self-supervised learning of obstacle appearance applied to MAV landing	2018	Robotics and Autonomous …	Elsevier	https://www.sciencedirect.com/science/article/pii/S0921889017305626	https://www.sciencedirect.com/science/article/pii/S0921889017305626
13	A Lemme, RF Reinhart, JJ Steil	Self-supervised bootstrapping of a movement primitive library from complex trajectories	2014	2014 IEEE-RAS International …	ieeexplore.ieee.org	https://ieeexplore.ieee.org/abstract/document/7041443/	https://ieeexplore.ieee.org/abstract/document/7041443/
13	Y Chen, C Schmid…	Self-supervised learning with geometric constraints in monocular video: Connecting flow, depth, and camera	2019	Proceedings of the IEEE …	openaccess.thecvf.com	http://openaccess.thecvf.com/content_ICCV_2019/html/Chen_Self-Supervised_Learning_With_Geometric_Constraints_in_Monocular_Video_Connecting_Flow_ICCV_2019_paper.html	http://openaccess.thecvf.com/content_ICCV_2019/html/Chen_Self-Supervised_Learning_With_Geometric_Constraints_in_Monocular_Video_Connecting_Flow_ICCV_2019_paper.html
13	SW Chung, JS Chung, HG Kang	Perfect match: Improved cross-modal embeddings for audio-visual synchronisation	2019	ICASSP 2019-2019 IEEE …	ieeexplore.ieee.org	https://ieeexplore.ieee.org/abstract/document/8682524/	https://ieeexplore.ieee.org/abstract/document/8682524/
13	Z Wu, G Lin, Q Tao, J Cai	M2e-try on net: Fashion from model to everyone	2019	Proceedings of the 27th ACM International …	dl.acm.org	https://dl.acm.org/doi/abs/10.1145/3343031.3351083	https://dl.acm.org/doi/abs/10.1145/3343031.3351083
12	K Lamers, S Tijmons, C De Wagter…	Self-supervised monocular distance learning on a lightweight micro air vehicle	2016	2016 IEEE/RSJ …	ieeexplore.ieee.org	https://ieeexplore.ieee.org/abstract/document/7759284/	https://ieeexplore.ieee.org/abstract/document/7759284/
12	O Sumer, T Dencker, B Ommer	Self-supervised learning of pose embeddings from spatiotemporal relations in videos	2017	Proceedings of the IEEE …	openaccess.thecvf.com	http://openaccess.thecvf.com/content_iccv_2017/html/Sumer_Self-Supervised_Learning_of_ICCV_2017_paper.html	http://openaccess.thecvf.com/content_iccv_2017/html/Sumer_Self-Supervised_Learning_of_ICCV_2017_paper.html
12	A Mahendran, J Thewlis, A Vedaldi	Cross pixel optical-flow similarity for self-supervised learning	2018	Asian Conference on Computer …	Springer	https://link.springer.com/chapter/10.1007/978-3-030-20873-8_7	https://link.springer.com/chapter/10.1007/978-3-030-20873-8_7
12	T Wang, M Qiao, M Zhang, Y Yang…	Data-driven prognostic method based on self-supervised learning approaches for fault detection	2018	Journal of Intelligent …	Springer	https://link.springer.com/article/10.1007/s10845-018-1431-x	https://link.springer.com/article/10.1007/s10845-018-1431-x
12	L Wellhausen, A Dosovitskiy, R Ranftl…	Where should i walk? predicting terrain properties from images via self-supervised learning	2019	IEEE Robotics and …	ieeexplore.ieee.org	https://ieeexplore.ieee.org/abstract/document/8627373/	https://ieeexplore.ieee.org/abstract/document/8627373/
12	R Roller, M Stevenson	Self-supervised relation extraction using UMLS	2014	International Conference of the Cross-Language …	Springer	https://link.springer.com/chapter/10.1007/978-3-319-11382-1_12	https://link.springer.com/chapter/10.1007/978-3-319-11382-1_12
12	T Chen, X Zhai, M Ritter, M Lucic, N Houlsby	Self-supervised generative adversarial networks	2018	arXiv preprint arXiv:1811.11212
12	Y Sun, E Tzeng, T Darrell, AA Efros	Unsupervised Domain Adaptation through Self-Supervision	2019	arXiv preprint arXiv:1909.11825	arxiv.org	https://arxiv.org/abs/1909.11825	https://arxiv.org/abs/1909.11825
12	BJ Meyer, B Harwood…	Deep metric learning and image classification with nearest neighbour gaussian kernels	2018	2018 25th IEEE …	ieeexplore.ieee.org	https://ieeexplore.ieee.org/abstract/document/8451297/	https://ieeexplore.ieee.org/abstract/document/8451297/
12	A Sanakoyeu, MA Bautista, B Ommer	Deep unsupervised learning of visual similarities	2018	Pattern Recognition	Elsevier	https://www.sciencedirect.com/science/article/pii/S0031320318300293	https://www.sciencedirect.com/science/article/pii/S0031320318300293
12	Y Wu, W AbdAlmageed…	Mantra-net: Manipulation tracing network for detection and localization of image forgeries with anomalous features	2019	Proceedings of the IEEE …	openaccess.thecvf.com	http://openaccess.thecvf.com/content_CVPR_2019/html/Wu_ManTra-Net_Manipulation_Tracing_Network_for_Detection_and_Localization_of_Image_CVPR_2019_paper.html	http://openaccess.thecvf.com/content_CVPR_2019/html/Wu_ManTra-Net_Manipulation_Tracing_Network_for_Detection_and_Localization_of_Image_CVPR_2019_paper.html
12	NS Patankar, AJ Kulkarni	Variations of cohort intelligence	2018	Soft Computing	Springer	https://link.springer.com/article/10.1007/s00500-017-2647-y	https://link.springer.com/article/10.1007/s00500-017-2647-y
11	C Florensa, J Degrave, N Heess…	Self-supervised learning of image embedding for continuous control	2019	arXiv preprint arXiv …	arxiv.org	https://arxiv.org/abs/1901.00943	https://arxiv.org/abs/1901.00943
11	V Sharma, M Tapaswi, MS Sarfraz…	Self-supervised learning of face representations for video face clustering	2019	2019 14th IEEE …	ieeexplore.ieee.org	https://ieeexplore.ieee.org/abstract/document/8756609/	https://ieeexplore.ieee.org/abstract/document/8756609/
11	A Rouditchenko, H Zhao, C Gan…	Self-supervised audio-visual co-segmentation	2019	ICASSP 2019-2019 …	ieeexplore.ieee.org	https://ieeexplore.ieee.org/abstract/document/8682467/	https://ieeexplore.ieee.org/abstract/document/8682467/
11	M Schoeler, SC Stein, J Papon…	Fast self-supervised on-line training for object recognition specifically for robotic applications	2014	… on Computer Vision …	ieeexplore.ieee.org	https://ieeexplore.ieee.org/abstract/document/7294918/	https://ieeexplore.ieee.org/abstract/document/7294918/
11	U Ahsan, R Madhok, I Essa	Video jigsaw: Unsupervised learning of spatiotemporal context for video action recognition	2019	2019 IEEE Winter Conference on …	ieeexplore.ieee.org	https://ieeexplore.ieee.org/abstract/document/8659002/	https://ieeexplore.ieee.org/abstract/document/8659002/
11	D Dwibedi, Y Aytar, J Tompson…	Temporal cycle-consistency learning	2019	Proceedings of the …	openaccess.thecvf.com	http://openaccess.thecvf.com/content_CVPR_2019/html/Dwibedi_Temporal_Cycle-Consistency_Learning_CVPR_2019_paper.html	http://openaccess.thecvf.com/content_CVPR_2019/html/Dwibedi_Temporal_Cycle-Consistency_Learning_CVPR_2019_paper.html
11	E Brachmann, C Rother	Neural-guided RANSAC: Learning where to sample model hypotheses	2019	Proceedings of the IEEE …	openaccess.thecvf.com	http://openaccess.thecvf.com/content_ICCV_2019/html/Brachmann_Neural-Guided_RANSAC_Learning_Where_to_Sample_Model_Hypotheses_ICCV_2019_paper.html	http://openaccess.thecvf.com/content_ICCV_2019/html/Brachmann_Neural-Guided_RANSAC_Learning_Where_to_Sample_Model_Hypotheses_ICCV_2019_paper.html
11	L Hu, Y Chen, S Wang, J Wang, J Shen…	Less annotation on personalized activity recognition using context data	2016	2016 Intl IEEE …	ieeexplore.ieee.org	https://ieeexplore.ieee.org/abstract/document/7816862/	https://ieeexplore.ieee.org/abstract/document/7816862/
11	X Zhai, J Puigcerver, A Kolesnikov, P Ruyssen…	The visual task adaptation benchmark	2019	arXiv preprint arXiv …	arxiv.org	https://arxiv.org/abs/1910.04867	https://arxiv.org/abs/1910.04867
10	B Ridge, A Leonardis, A Ude…	Self-supervised online learning of basic object push affordances	2015	… Journal of Advanced …	journals.sagepub.com	https://journals.sagepub.com/doi/abs/10.5772/59654	https://journals.sagepub.com/doi/abs/10.5772/59654
10	H Spitzer, K Kiwitz, K Amunts, S Harmeling…	Improving cytoarchitectonic segmentation of human brain areas with self-supervised siamese networks	2018	… Conference on Medical …	Springer	https://link.springer.com/chapter/10.1007/978-3-030-00931-1_76	https://link.springer.com/chapter/10.1007/978-3-030-00931-1_76
10	X Zhan, Z Liu, P Luo, X Tang, CC Loy	Mix-and-match tuning for self-supervised semantic segmentation	2018	Thirty-Second AAAI Conference on …	aaai.org	https://www.aaai.org/ocs/index.php/AAAI/AAAI18/paper/viewPaper/17180	https://www.aaai.org/ocs/index.php/AAAI/AAAI18/paper/viewPaper/17180
10	A Kouris, CS Bouganis	Learning to fly by myself: A self-supervised cnn-based approach for autonomous navigation	2018	2018 IEEE/RSJ International …	ieeexplore.ieee.org	https://ieeexplore.ieee.org/abstract/document/8594204/	https://ieeexplore.ieee.org/abstract/document/8594204/
10	WP Sanberg, G Dubbelman…	Color-based free-space segmentation using online disparity-supervised learning	2015	2015 IEEE 18th …	ieeexplore.ieee.org	https://ieeexplore.ieee.org/abstract/document/7313244/	https://ieeexplore.ieee.org/abstract/document/7313244/
10	J Wang, J Jiao, L Bao, S He, Y Liu…	Self-supervised spatio-temporal representation learning for videos by predicting motion and appearance statistics	2019	Proceedings of the …	openaccess.thecvf.com	http://openaccess.thecvf.com/content_CVPR_2019/html/Wang_Self-Supervised_Spatio-Temporal_Representation_Learning_for_Videos_by_Predicting_Motion_and_CVPR_2019_paper.html	http://openaccess.thecvf.com/content_CVPR_2019/html/Wang_Self-Supervised_Spatio-Temporal_Representation_Learning_for_Videos_by_Predicting_Motion_and_CVPR_2019_paper.html
10	A Anand, E Racah, S Ozair, Y Bengio…	Unsupervised state representation learning in atari	2019	Advances in Neural …	papers.nips.cc	http://papers.nips.cc/paper/9081-unsupervised-state-representation-learning-in-atari	http://papers.nips.cc/paper/9081-unsupervised-state-representation-learning-in-atari
10	X Li, L Yu, H Chen, CW Fu, PA Heng	Semi-supervised skin lesion segmentation via transformation consistent self-ensembling model	2018	arXiv preprint arXiv:1808.03887	arxiv.org	https://arxiv.org/abs/1808.03887	https://arxiv.org/abs/1808.03887
10	J Chen, S Chen, Q Wang, B Cao…	iRAF: A Deep Reinforcement Learning Approach for Collaborative Mobile Edge Computing IoT Networks	2019	IEEE Internet of Things …	ieeexplore.ieee.org	https://ieeexplore.ieee.org/abstract/document/8698845/	https://ieeexplore.ieee.org/abstract/document/8698845/
10	RG Sousa, ARR Neto, JS Cardoso…	Robust classification with reject option using the self-organizing map	2015	Neural Computing and …	Springer	https://link.springer.com/article/10.1007/s00521-015-1822-2	https://link.springer.com/article/10.1007/s00521-015-1822-2
10	Z Ma, S Liu, D Meng, Y Zhang, SL Lo, Z Han	On Convergence Properties of Implicit Self-paced Objective	2018	Information Sciences	Elsevier	https://www.sciencedirect.com/science/article/pii/S0020025518304535	https://www.sciencedirect.com/science/article/pii/S0020025518304535
10	W Wang, N Wang, X Wu, S You…	Self-paced cross-modality transfer learning for efficient road segmentation	2017	2017 IEEE International …	ieeexplore.ieee.org	https://ieeexplore.ieee.org/abstract/document/7989166/	https://ieeexplore.ieee.org/abstract/document/7989166/
10	O Koller, C Camgoz, H Ney…	Weakly Supervised Learning with Multi-Stream CNN-LSTM-HMMs to Discover Sequential Parallelism in Sign Language Videos	2019	IEEE transactions on …	ieeexplore.ieee.org	https://ieeexplore.ieee.org/abstract/document/8691602/	https://ieeexplore.ieee.org/abstract/document/8691602/
10	Y Tao, R Triebel, D Cremers	Semi-supervised online learning for efficient classification of objects in 3d data streams	2015	2015 IEEE/RSJ International …	ieeexplore.ieee.org	https://ieeexplore.ieee.org/abstract/document/7353777/	https://ieeexplore.ieee.org/abstract/document/7353777/
9	Z Lai, W Xie	Self-supervised learning for video correspondence flow	2019	arXiv preprint arXiv:1905.00875	arxiv.org	https://arxiv.org/abs/1905.00875	https://arxiv.org/abs/1905.00875
9	FE Wang, HN Hu, HT Cheng, JT Lin, ST Yang…	Self-supervised Learning of Depth and Camera Motion from 360 Videos	2018	Asian Conference on …	Springer	https://link.springer.com/chapter/10.1007/978-3-030-20873-8_4	https://link.springer.com/chapter/10.1007/978-3-030-20873-8_4
9	P Zhang, F Wang, Y Zheng	Self supervised deep representation learning for fine-grained body part recognition	2017	2017 IEEE 14th International …	ieeexplore.ieee.org	https://ieeexplore.ieee.org/abstract/document/7950587/	https://ieeexplore.ieee.org/abstract/document/7950587/
9	D Jayaraman, R Gao…	ShapeCodes: self-supervised feature learning by lifting views to viewgrids	2018	Proceedings of the …	openaccess.thecvf.com	http://openaccess.thecvf.com/content_ECCV_2018/html/Dinesh_Jayaraman_ShapeCodes_Self-Supervised_Feature_ECCV_2018_paper.html	http://openaccess.thecvf.com/content_ECCV_2018/html/Dinesh_Jayaraman_ShapeCodes_Self-Supervised_Feature_ECCV_2018_paper.html
9	ÁS Hervella, J Rouco, J Novo, M Ortega	Retinal image understanding emerges from self-supervised multimodal reconstruction	2018	International Conference on …	Springer	https://link.springer.com/chapter/10.1007/978-3-030-00928-1_37	https://link.springer.com/chapter/10.1007/978-3-030-00928-1_37
9	T Chen, S Kornblith, M Norouzi, G Hinton	A simple framework for contrastive learning of visual representations	2020	arXiv preprint arXiv …	arxiv.org	https://arxiv.org/abs/2002.05709	https://arxiv.org/abs/2002.05709
9	C Wan, T Probst, LV Gool…	Self-supervised 3d hand pose estimation through training by fitting	2019	Proceedings of the IEEE …	openaccess.thecvf.com	http://openaccess.thecvf.com/content_CVPR_2019/html/Wan_Self-Supervised_3D_Hand_Pose_Estimation_Through_Training_by_Fitting_CVPR_2019_paper.html	http://openaccess.thecvf.com/content_CVPR_2019/html/Wan_Self-Supervised_3D_Hand_Pose_Estimation_Through_Training_by_Fitting_CVPR_2019_paper.html
9	HU Dike, Y Zhou, KK Deveerasetty…	Unsupervised learning based on artificial neural network: A review	2018	2018 IEEE International …	ieeexplore.ieee.org	https://ieeexplore.ieee.org/abstract/document/8612259/	https://ieeexplore.ieee.org/abstract/document/8612259/
9	H Lu, L Jiang, A Zell	Long range traversable region detection based on superpixels clustering for mobile robots	2015	… on Intelligent Robots and Systems (IROS …	ieeexplore.ieee.org	https://ieeexplore.ieee.org/abstract/document/7353425/	https://ieeexplore.ieee.org/abstract/document/7353425/
9	K Otsu, T Kubota	Energy-aware terrain analysis for mobile robot exploration	2016	Field and Service Robotics	Springer	https://link.springer.com/chapter/10.1007/978-3-319-27702-8_25	https://link.springer.com/chapter/10.1007/978-3-319-27702-8_25
9	I Augenstein	Joint information extraction from the web using linked data	2014	International Semantic Web Conference	Springer	https://link.springer.com/chapter/10.1007/978-3-319-11915-1_32	https://link.springer.com/chapter/10.1007/978-3-319-11915-1_32
9	S Gopal	Artificial neural networks in geospatial analysis	2016	International Encyclopedia of Geography: People, the …	Wiley Online Library	https://onlinelibrary.wiley.com/doi/abs/10.1002/9781118786352.wbieg0322	https://onlinelibrary.wiley.com/doi/abs/10.1002/9781118786352.wbieg0322
9	TD Sequist	Clinical documentation to improve patient care	2015	Annals of internal medicine	annals.org	https://annals.org/aim/fullarticle/2089369	https://annals.org/aim/fullarticle/2089369
9	M Mostajabi, M Maire…	Regularizing deep networks by modeling and predicting label structure	2018	Proceedings of the …	openaccess.thecvf.com	http://openaccess.thecvf.com/content_cvpr_2018/html/Mostajabi_Regularizing_Deep_Networks_CVPR_2018_paper.html	http://openaccess.thecvf.com/content_cvpr_2018/html/Mostajabi_Regularizing_Deep_Networks_CVPR_2018_paper.html
9	Z Zhang, Q Li, Z Huang, J Wu, J Tenenbaum…	Shape and material from sound	2017	Advances in Neural …	papers.nips.cc	http://papers.nips.cc/paper/6727-shape-and-material-from-sound	http://papers.nips.cc/paper/6727-shape-and-material-from-sound
9	Z Lin, X Jin, X Xu, Y Wang, S Tan…	Make it possible: multilingual sentiment analysis without much prior knowledge	2014	2014 IEEE/WIC/ACM …	ieeexplore.ieee.org	https://ieeexplore.ieee.org/abstract/document/6927610/	https://ieeexplore.ieee.org/abstract/document/6927610/
8	HW Ho, C De Wagter, BDW Remes…	Optical flow for self-supervised learning of obstacle appearance	2015	2015 IEEE/RSJ …	ieeexplore.ieee.org	https://ieeexplore.ieee.org/abstract/document/7353805/	https://ieeexplore.ieee.org/abstract/document/7353805/
8	A Dehban, L Jamone, AR Kampff…	A deep probabilistic framework for heterogeneous self-supervised learning of affordances	2017	2017 IEEE-RAS 17th …	ieeexplore.ieee.org	https://ieeexplore.ieee.org/abstract/document/8246915/	https://ieeexplore.ieee.org/abstract/document/8246915/
8	T Mar, V Tikhanoff, G Metta…	Self-supervised learning of tool affordances from 3D tool representation through parallel SOM mapping	2017	2017 IEEE International …	ieeexplore.ieee.org	https://ieeexplore.ieee.org/abstract/document/7989110/	https://ieeexplore.ieee.org/abstract/document/7989110/
8	X Tu, J Zhao, Z Jiang, Y Luo, M Xie, Y Zhao…	Joint 3D face reconstruction and dense face alignment from a single image with 2D-assisted self-supervised learning	2019	arXiv preprint arXiv …	arxiv.org	https://arxiv.org/abs/1903.09359	https://arxiv.org/abs/1903.09359
8	I Misra, L van der Maaten	Self-supervised learning of pretext-invariant representations	2019	arXiv preprint arXiv:1912.01991	arxiv.org	https://arxiv.org/abs/1912.01991	https://arxiv.org/abs/1912.01991
8	C Gan, H Zhao, P Chen, D Cox…	Self-supervised moving vehicle tracking with stereo sound	2019	Proceedings of the …	openaccess.thecvf.com	http://openaccess.thecvf.com/content_ICCV_2019/html/Gan_Self-Supervised_Moving_Vehicle_Tracking_With_Stereo_Sound_ICCV_2019_paper.html	http://openaccess.thecvf.com/content_ICCV_2019/html/Gan_Self-Supervised_Moving_Vehicle_Tracking_With_Stereo_Sound_ICCV_2019_paper.html
8	Y Wang, J Liu, J Wang, Y Li, H Lu	Color names learning using convolutional neural networks	2015	2015 IEEE International …	ieeexplore.ieee.org	https://ieeexplore.ieee.org/abstract/document/7350791/	https://ieeexplore.ieee.org/abstract/document/7350791/
8	J Shabbir, T Anwer	A survey of deep learning techniques for mobile robot applications	2018	arXiv preprint arXiv:1803.07608	arxiv.org	https://arxiv.org/abs/1803.07608	https://arxiv.org/abs/1803.07608
8	D Konar, S Bhattacharyya, BK Panigrahi…	A quantum bi-directional self-organizing neural network (QBDSONN) architecture for binary object extraction from a noisy perspective	2016	Applied Soft …	Elsevier	https://www.sciencedirect.com/science/article/pii/S1568494615008303	https://www.sciencedirect.com/science/article/pii/S1568494615008303
8	R Santa Cruz, B Fernando, A Cherian…	Visual permutation learning	2018	IEEE transactions on …	ieeexplore.ieee.org	https://ieeexplore.ieee.org/abstract/document/8481554/	https://ieeexplore.ieee.org/abstract/document/8481554/
8	A Ošep, P Voigtlaender, J Luiten, S Breuers…	Large-scale object discovery and detector adaptation from unlabeled video	2017	arXiv preprint arXiv …	arxiv.org	https://arxiv.org/abs/1712.08832	https://arxiv.org/abs/1712.08832
8	X Li, Q Sun, Y Liu, Q Zhou, S Zheng…	Learning to self-train for semi-supervised few-shot classification	2019	Advances in Neural …	papers.nips.cc	http://papers.nips.cc/paper/9216-learning-to-self-train-for-semi-supervised-few-shot-classification	http://papers.nips.cc/paper/9216-learning-to-self-train-for-semi-supervised-few-shot-classification
8	N Haber, D Mrowca, L Fei-Fei, DLK Yamins	Emergence of structured behaviors from curiosity-based intrinsic motivation	2018	arXiv preprint arXiv …	arxiv.org	https://arxiv.org/abs/1802.07461	https://arxiv.org/abs/1802.07461
8	J Huang, Q Dong, S Gong, X Zhu	Unsupervised deep learning by neighbourhood discovery	2019	arXiv preprint arXiv:1904.11567	arxiv.org	https://arxiv.org/abs/1904.11567	https://arxiv.org/abs/1904.11567
8	D Harwath, J Glass	Towards visually grounded sub-word speech unit discovery	2019	ICASSP 2019-2019 IEEE International …	ieeexplore.ieee.org	https://ieeexplore.ieee.org/abstract/document/8682666/	https://ieeexplore.ieee.org/abstract/document/8682666/
7	T Mar, V Tikhanoff, L Natale	What can i do with this tool? self-supervised learning of tool affordances from their 3-d geometry	2017	IEEE Transactions on Cognitive …	ieeexplore.ieee.org	https://ieeexplore.ieee.org/abstract/document/7953566/	https://ieeexplore.ieee.org/abstract/document/7953566/
7	S Singh, A Batra, G Pang, L Torresani, S Basu, M Paluri…	Self-Supervised Feature Learning for Semantic Segmentation of Overhead Imagery.	2018	BMVC	researchgate.net	https://www.researchgate.net/profile/Suriya_Singh/publication/327546680_Self-Supervised_Feature_Learning_for_Semantic_Segmentation_of_Overhead_Imagery/links/5c0d868ba6fdcc494fe880c1/Self-Supervised-Feature-Learning-for-Semantic-Segmentation-of-Overhead-Imagery.pdf	#VALUE!
7	KH Jin, M Unser, KM Yi	Self-supervised deep active accelerated MRI	2019	arXiv preprint arXiv:1901.04547	arxiv.org	https://arxiv.org/abs/1901.04547	https://arxiv.org/abs/1901.04547
7	D Dwibedi, J Tompson, C Lynch…	Learning actionable representations from visual observations	2018	2018 IEEE/RSJ …	ieeexplore.ieee.org	https://ieeexplore.ieee.org/abstract/document/8593951/	https://ieeexplore.ieee.org/abstract/document/8593951/
7	Z Wu, Y Xiong, S Yu, D Lin	Unsupervised feature learning via non-parametric instance-level discrimination	2018	arXiv preprint arXiv:1805.01978	arxiv.org	https://arxiv.org/abs/1805.01978	https://arxiv.org/abs/1805.01978
7	YS Huang, SY Chou, YH Yang	Similarity embedding network for unsupervised sequential pattern learning by playing music puzzle games	2017	arXiv preprint arXiv …	pdfs.semanticscholar.org	https://pdfs.semanticscholar.org/3121/5cd41c17870b3847f4d2eaba5787083ec36e.pdf	https://pdfs.semanticscholar.org/3121/5cd41c17870b3847f4d2eaba5787083ec36e.pdf
7	Y Schroecker, M Vecerik, J Scholz	Generative predecessor models for sample-efficient imitation learning	2019	arXiv preprint arXiv:1904.01139	arxiv.org	https://arxiv.org/abs/1904.01139	https://arxiv.org/abs/1904.01139
7	R Hanocka, N Fish, Z Wang, R Giryes…	Alignet: Partial-shape agnostic alignment via unsupervised learning	2018	ACM Transactions on …	dl.acm.org	https://dl.acm.org/doi/abs/10.1145/3267347	https://dl.acm.org/doi/abs/10.1145/3267347
7	E Arazo, D Ortego, P Albert, NE O'Connor…	Pseudo-labeling and confirmation bias in deep semi-supervised learning	2019	arXiv preprint arXiv …	arxiv.org	https://arxiv.org/abs/1908.02983	https://arxiv.org/abs/1908.02983
7	T Wang, Z Miao, Y Chen, Y Zhou, G Shan, H Snoussi	Aed-net: An abnormal event detection network	2019	Engineering	Elsevier	https://www.sciencedirect.com/science/article/pii/S2095809918304880	https://www.sciencedirect.com/science/article/pii/S2095809918304880
7	A Diba, V Sharma, LV Gool…	Dynamonet: Dynamic action and motion network	2019	Proceedings of the …	openaccess.thecvf.com	http://openaccess.thecvf.com/content_ICCV_2019/html/Diba_DynamoNet_Dynamic_Action_and_Motion_Network_ICCV_2019_paper.html	http://openaccess.thecvf.com/content_ICCV_2019/html/Diba_DynamoNet_Dynamic_Action_and_Motion_Network_ICCV_2019_paper.html
7	D Ren, K Zhang, Q Wang, Q Hu, W Zuo	Neural blind deconvolution using deep priors	2019	arXiv preprint arXiv:1908.02197	arxiv.org	https://arxiv.org/abs/1908.02197	https://arxiv.org/abs/1908.02197
6	I Funke, A Jenke, ST Mees, J Weitz, S Speidel…	Temporal coherence-based self-supervised learning for laparoscopic workflow analysis	2018	OR 2.0 Context-Aware …	Springer	https://link.springer.com/chapter/10.1007/978-3-030-01201-4_11	https://link.springer.com/chapter/10.1007/978-3-030-01201-4_11
6	K van Hecke, G de Croon, L van der Maaten…	Persistent self-supervised learning principle: from stereo to monocular vision for obstacle avoidance	2016	arXiv preprint arXiv …	arxiv.org	https://arxiv.org/abs/1603.08047	https://arxiv.org/abs/1603.08047
6	M Tagliasacchi, B Gfeller, FC Quitry…	Self-supervised audio representation learning for mobile devices	2019	arXiv preprint arXiv …	arxiv.org	https://arxiv.org/abs/1905.11796	https://arxiv.org/abs/1905.11796
6	X Jin, Z Chen, J Lin, Z Chen…	Unsupervised single image deraining with self-supervised constraints	2019	2019 IEEE International …	ieeexplore.ieee.org	https://ieeexplore.ieee.org/abstract/document/8803238/	https://ieeexplore.ieee.org/abstract/document/8803238/
6	E Chee, Z Wu	Airnet: Self-supervised affine registration for 3d medical images using neural networks	2018	arXiv preprint arXiv:1810.02583	arxiv.org	https://arxiv.org/abs/1810.02583	https://arxiv.org/abs/1810.02583
6	X Lu	Self-supervised road detection from a single image	2015	2015 IEEE International Conference on Image …	ieeexplore.ieee.org	https://ieeexplore.ieee.org/abstract/document/7351351/	https://ieeexplore.ieee.org/abstract/document/7351351/
6	AJR Simpson	On-the-fly learning in a perpetual learning machine	2015	arXiv preprint arXiv:1509.00913	arxiv.org	https://arxiv.org/abs/1509.00913	https://arxiv.org/abs/1509.00913
6	R Rao, N Bhattacharya, N Thomas, Y Duan…	Evaluating protein transfer learning with TAPE	2019	Advances in Neural …	papers.nips.cc	http://papers.nips.cc/paper/9163-evaluating-protein-transfer-learning-with-tape	http://papers.nips.cc/paper/9163-evaluating-protein-transfer-learning-with-tape
6	H Wang, Y Sun, M Liu	Self-Supervised Drivable Area and Road Anomaly Segmentation Using RGB-D Data For Robotic Wheelchairs	2019	IEEE Robotics and Automation Letters	ieeexplore.ieee.org	https://ieeexplore.ieee.org/abstract/document/8786197/	https://ieeexplore.ieee.org/abstract/document/8786197/
6	S Ozair, C Lynch, Y Bengio, A Van den Oord…	Wasserstein dependency measure for representation learning	2019	Advances in Neural …	papers.nips.cc	http://papers.nips.cc/paper/9692-wasserstein-dependency-measure-for-representation-learning	http://papers.nips.cc/paper/9692-wasserstein-dependency-measure-for-representation-learning
6	AX Lu, OZ Kraus, S Cooper…	Learning unsupervised feature representations for single cell microscopy images with paired cell inpainting	2019	PLoS computational …	journals.plos.org	https://journals.plos.org/ploscompbiol/article?rev=1&id=10.1371/journal.pcbi.1007348	https://journals.plos.org/ploscompbiol/article?rev=1&id=10.1371/journal.pcbi.1007348
6	SU Akram, T Qaiser, S Graham, J Kannala…	Leveraging unlabeled whole-slide-images for mitosis detection	2018	… and Ophthalmic Medical …	Springer	https://link.springer.com/chapter/10.1007/978-3-030-00949-6_9	https://link.springer.com/chapter/10.1007/978-3-030-00949-6_9
6	D Berthelot, N Carlini, ED Cubuk, A Kurakin…	ReMixMatch: Semi-Supervised Learning with Distribution Alignment and Augmentation Anchoring	2019	arXiv preprint arXiv …	arxiv.org	https://arxiv.org/abs/1911.09785	https://arxiv.org/abs/1911.09785
6	M Ramamonjisoa, V Lepetit	Sharpnet: Fast and accurate recovery of occluding contours in monocular depth estimation	2019	Proceedings of the IEEE …	openaccess.thecvf.com	http://openaccess.thecvf.com/content_ICCVW_2019/html/3DRW/Ramamonjisoa_SharpNet_Fast_and_Accurate_Recovery_of_Occluding_Contours_in_Monocular_ICCVW_2019_paper.html	http://openaccess.thecvf.com/content_ICCVW_2019/html/3DRW/Ramamonjisoa_SharpNet_Fast_and_Accurate_Recovery_of_Occluding_Contours_in_Monocular_ICCVW_2019_paper.html
6	H Zhang, X Dai, F Sun, J Yuan	Terrain classification in field environment based on Random Forest for the mobile robot	2016	2016 35th Chinese Control …	ieeexplore.ieee.org	https://ieeexplore.ieee.org/abstract/document/7554310/	https://ieeexplore.ieee.org/abstract/document/7554310/
6	S Sengupta, J Gu, K Kim, G Liu…	Neural inverse rendering of an indoor scene from a single image	2019	Proceedings of the …	openaccess.thecvf.com	http://openaccess.thecvf.com/content_ICCV_2019/html/Sengupta_Neural_Inverse_Rendering_of_an_Indoor_Scene_From_a_Single_ICCV_2019_paper.html	http://openaccess.thecvf.com/content_ICCV_2019/html/Sengupta_Neural_Inverse_Rendering_of_an_Indoor_Scene_From_a_Single_ICCV_2019_paper.html
6	MG Azar, B Piot, BA Pires, JB Grill, F Altché…	World discovery models	2019	arXiv preprint arXiv …	arxiv.org	https://arxiv.org/abs/1902.07685	https://arxiv.org/abs/1902.07685
5	J Baleia, P Santana, J Barata	Self-supervised learning of depth-based navigation affordances from haptic cues	2014	2014 IEEE International …	ieeexplore.ieee.org	https://ieeexplore.ieee.org/abstract/document/6849777/	https://ieeexplore.ieee.org/abstract/document/6849777/
5	K Van Hecke, GCHE de Croon, D Hennes…	Self-supervised learning as an enabling technology for future space exploration robots: ISS experiments on monocular distance learning	2017	Acta Astronautica	Elsevier	https://www.sciencedirect.com/science/article/pii/S0094576517302862	https://www.sciencedirect.com/science/article/pii/S0094576517302862
5	X Zhan, X Pan, Z Liu, D Lin…	Self-supervised learning via conditional motion propagation	2019	Proceedings of the IEEE …	openaccess.thecvf.com	http://openaccess.thecvf.com/content_CVPR_2019/html/Zhan_Self-Supervised_Learning_via_Conditional_Motion_Propagation_CVPR_2019_paper.html	http://openaccess.thecvf.com/content_CVPR_2019/html/Zhan_Self-Supervised_Learning_via_Conditional_Motion_Propagation_CVPR_2019_paper.html
5	C Zhang, Y Peng	Better and faster: knowledge transfer from multiple self-supervised learning tasks via graph distillation for video classification	2018	arXiv preprint arXiv:1804.10069	arxiv.org	https://arxiv.org/abs/1804.10069	https://arxiv.org/abs/1804.10069
5	A Baevski, S Schneider, M Auli	vq-wav2vec: Self-Supervised Learning of Discrete Speech Representations	2019	arXiv preprint arXiv:1910.05453	arxiv.org	https://arxiv.org/abs/1910.05453	https://arxiv.org/abs/1910.05453
5	K van Hecke, G de Croon…	Persistent self-supervised learning: From stereo to monocular vision for obstacle avoidance	2018	… Journal of Micro Air …	journals.sagepub.com	https://journals.sagepub.com/doi/abs/10.1177/1756829318756355	https://journals.sagepub.com/doi/abs/10.1177/1756829318756355
5	W Bai, C Chen, G Tarroni, J Duan, F Guitton…	Self-Supervised learning for cardiac MR image segmentation by anatomical position prediction	2019	… Conference on Medical …	Springer	https://link.springer.com/chapter/10.1007/978-3-030-32245-8_60	https://link.springer.com/chapter/10.1007/978-3-030-32245-8_60
5	J Xu, H Guo, S Wu	Indoor multi-sensory self-supervised autonomous mobile robotic navigation	2018	2018 IEEE International Conference on …	ieeexplore.ieee.org	https://ieeexplore.ieee.org/abstract/document/8539110/	https://ieeexplore.ieee.org/abstract/document/8539110/
5	P Sudowe, B Leibe	PatchIt: Self-Supervised Network Weight Initialization for Fine-grained Recognition.	2016	BMVC	bmva.org	http://www.bmva.org/bmvc/2016/papers/paper075/paper075.pdf	http://www.bmva.org/bmvc/2016/papers/paper075/paper075.pdf
5	Y Zhang, X Gao, S Lee, C Brockett, M Galley…	Consistent dialogue generation with self-supervised feature learning	2019	arXiv preprint arXiv …	arxiv.org	https://arxiv.org/abs/1903.05759	https://arxiv.org/abs/1903.05759
5	L Chen, P Bentley, K Mori, K Misawa, M Fujiwara…	Self-supervised learning for medical image analysis using image context restoration	2019	Medical image …	Elsevier	https://www.sciencedirect.com/science/article/pii/S1361841518304699	https://www.sciencedirect.com/science/article/pii/S1361841518304699
5	V Guizilini, R Ambrus, S Pillai, A Gaidon	Packnet-sfm: 3d packing for self-supervised monocular depth estimation	2019	arXiv preprint arXiv:1905.02693	arxiv.org	https://arxiv.org/abs/1905.02693	https://arxiv.org/abs/1905.02693
5	D DeTone, T Malisiewicz, A Rabinovich	Self-improving visual odometry	2018	arXiv preprint arXiv:1812.03245	arxiv.org	https://arxiv.org/abs/1812.03245	https://arxiv.org/abs/1812.03245
5	J Watson, M Firman, GJ Brostow…	Self-Supervised Monocular Depth Hints	2019	Proceedings of the …	openaccess.thecvf.com	http://openaccess.thecvf.com/content_ICCV_2019/html/Watson_Self-Supervised_Monocular_Depth_Hints_ICCV_2019_paper.html	http://openaccess.thecvf.com/content_ICCV_2019/html/Watson_Self-Supervised_Monocular_Depth_Hints_ICCV_2019_paper.html
5	M Nava, J Guzzi, RO Chavez-Garcia…	Learning long-range perception using self-supervision from short-range sensors and odometry	2019	IEEE Robotics and …	ieeexplore.ieee.org	https://ieeexplore.ieee.org/abstract/document/8624299/	https://ieeexplore.ieee.org/abstract/document/8624299/
5	S Nair, M Babaeizadeh, C Finn, S Levine…	Time reversal as self-supervision	2018	arXiv preprint arXiv …	arxiv.org	https://arxiv.org/abs/1810.01128	https://arxiv.org/abs/1810.01128
5	K Hassani, M Haley	Unsupervised multi-task feature learning on point clouds	2019	Proceedings of the IEEE International …	openaccess.thecvf.com	http://openaccess.thecvf.com/content_ICCV_2019/html/Hassani_Unsupervised_Multi-Task_Feature_Learning_on_Point_Clouds_ICCV_2019_paper.html	http://openaccess.thecvf.com/content_ICCV_2019/html/Hassani_Unsupervised_Multi-Task_Feature_Learning_on_Point_Clouds_ICCV_2019_paper.html
5	Z Liang, H Liu, L Qiao, Y Feng, W Chen	Improving stereo matching by incorporating geometry prior into convnet	2017	Electronics Letters	IET	https://digital-library.theiet.org/content/journals/10.1049/el.2017.2418	https://digital-library.theiet.org/content/journals/10.1049/el.2017.2418
5	Z Zhou, V Sodha, MMR Siddiquee, R Feng…	Models genesis: Generic autodidactic models for 3d medical image analysis	2019	… Conference on Medical …	Springer	https://link.springer.com/chapter/10.1007/978-3-030-32251-9_42	https://link.springer.com/chapter/10.1007/978-3-030-32251-9_42
5	BT James, BB Luczak, HZ Girgis	FASTCAR: Rapid alignment-free prediction of sequence alignment identity scores	2018	bioRxiv	biorxiv.org	https://www.biorxiv.org/content/10.1101/380824v1.abstract	https://www.biorxiv.org/content/10.1101/380824v1.abstract
5	X Li, L Yu, H Chen, CW Fu, PA Heng	Transformation consistent self-ensembling model for semi-supervised medical image segmentation	2019	arXiv preprint arXiv:1903.00348	arxiv.org	https://arxiv.org/abs/1903.00348	https://arxiv.org/abs/1903.00348
5	R Sakurai, S Yamane, JH Lee	Restoring aspect ratio distortion of natural images with convolutional neural network	2018	IEEE Transactions on Industrial …	ieeexplore.ieee.org	https://ieeexplore.ieee.org/abstract/document/8283554/	https://ieeexplore.ieee.org/abstract/document/8283554/
5	DK Shin, MU Ahmed, PK Rhee	Incremental deep learning for robust object detection in unknown cluttered environments	2018	IEEE Access	ieeexplore.ieee.org	https://ieeexplore.ieee.org/abstract/document/8490884/	https://ieeexplore.ieee.org/abstract/document/8490884/
5	A Atapour-Abarghouei, S Akcay…	Generative adversarial framework for depth filling via wasserstein metric, cosine transform and domain transfer	2019	Pattern Recognition	Elsevier	https://www.sciencedirect.com/science/article/pii/S0031320319300743	https://www.sciencedirect.com/science/article/pii/S0031320319300743
5	H Rhodin, V Constantin, I Katircioglu…	Neural scene decomposition for multi-person motion capture	2019	Proceedings of the …	openaccess.thecvf.com	http://openaccess.thecvf.com/content_CVPR_2019/html/Rhodin_Neural_Scene_Decomposition_for_Multi-Person_Motion_Capture_CVPR_2019_paper.html	http://openaccess.thecvf.com/content_CVPR_2019/html/Rhodin_Neural_Scene_Decomposition_for_Multi-Person_Motion_Capture_CVPR_2019_paper.html
5	T Groueix, M Fisher, VG Kim…	Unsupervised cycle‐consistent deformation for shape matching	2019	Computer Graphics …	Wiley Online Library	https://onlinelibrary.wiley.com/doi/abs/10.1111/cgf.13794	https://onlinelibrary.wiley.com/doi/abs/10.1111/cgf.13794
5	K Gregor, DJ Rezende, F Besse, Y Wu…	Shaping Belief States with Generative Environment Models for RL	2019	Advances in Neural …	papers.nips.cc	http://papers.nips.cc/paper/9503-shaping-belief-states-with-generative-environment-models-for-rl	http://papers.nips.cc/paper/9503-shaping-belief-states-with-generative-environment-models-for-rl
5	N Neverova, J Thewlis, RA Guler…	Slim densepose: Thrifty learning from sparse annotations and motion cues	2019	Proceedings of the …	openaccess.thecvf.com	http://openaccess.thecvf.com/content_CVPR_2019/html/Neverova_Slim_DensePose_Thrifty_Learning_From_Sparse_Annotations_and_Motion_Cues_CVPR_2019_paper.html	http://openaccess.thecvf.com/content_CVPR_2019/html/Neverova_Slim_DensePose_Thrifty_Learning_From_Sparse_Annotations_and_Motion_Cues_CVPR_2019_paper.html
5	曾令伟, 伍振兴, 杜文才	基于改进自监督学习群体智能 (ISLCI) 的高性能聚类算法	2016	重庆邮电大学学报 (自然科学版)	airitilibrary.com	https://www.airitilibrary.com/Publication/alDetailedMesh?docid=cqydxyxb-zrkx201601020	https://www.airitilibrary.com/Publication/alDetailedMesh?docid=cqydxyxb-zrkx201601020
4	D Martins, K Van Hecke…	Fusion of stereo and still monocular depth estimates in a self-supervised learning context	2018	2018 IEEE International …	ieeexplore.ieee.org	https://ieeexplore.ieee.org/abstract/document/8461116/	https://ieeexplore.ieee.org/abstract/document/8461116/
4	M Lee, CC Fowlkes	CeMNet: Self-supervised learning for accurate continuous ego-motion estimation	2019	… of the IEEE Conference on Computer …	openaccess.thecvf.com	http://openaccess.thecvf.com/content_CVPRW_2019/html/VOCVALC/Lee_CeMNet_Self-Supervised_Learning_for_Accurate_Continuous_Ego-Motion_Estimation_CVPRW_2019_paper.html	http://openaccess.thecvf.com/content_CVPRW_2019/html/VOCVALC/Lee_CeMNet_Self-Supervised_Learning_for_Accurate_Continuous_Ego-Motion_Estimation_CVPRW_2019_paper.html
4	T Stafylakis, J Rohdin, O Plchot, P Mizera…	Self-supervised speaker embeddings	2019	arXiv preprint arXiv …	arxiv.org	https://arxiv.org/abs/1904.03486	https://arxiv.org/abs/1904.03486
4	O Halimi, O Litany, E Rodolà, A Bronstein…	Self-supervised Learning of Dense Shape Correspondence	2018	arXiv preprint arXiv …	arxiv.org	https://arxiv.org/abs/1812.02415	https://arxiv.org/abs/1812.02415
4	L Chen, W Tang, TR Wan, NW John	Self-supervised monocular image depth learning and confidence estimation	2020	Neurocomputing	Elsevier	https://www.sciencedirect.com/science/article/pii/S0925231219316388	https://www.sciencedirect.com/science/article/pii/S0925231219316388
4	Y Li, J Zeng, S Shan, X Chen	Self-supervised representation learning from videos for facial action unit detection	2019	Proceedings of the IEEE …	openaccess.thecvf.com	http://openaccess.thecvf.com/content_CVPR_2019/html/Li_Self-Supervised_Representation_Learning_From_Videos_for_Facial_Action_Unit_Detection_CVPR_2019_paper.html	http://openaccess.thecvf.com/content_CVPR_2019/html/Li_Self-Supervised_Representation_Learning_From_Videos_for_Facial_Action_Unit_Detection_CVPR_2019_paper.html
4	J Wu, X Wang, WY Wang	Self-supervised dialogue learning	2019	arXiv preprint arXiv:1907.00448	arxiv.org	https://arxiv.org/abs/1907.00448	https://arxiv.org/abs/1907.00448
4	A Harakeh, D Asmar…	Identifying good training data for self-supervised free space estimation	2016	Proceedings of the IEEE …	openaccess.thecvf.com	http://openaccess.thecvf.com/content_cvpr_2016/html/Harakeh_Identifying_Good_Training_CVPR_2016_paper.html	http://openaccess.thecvf.com/content_cvpr_2016/html/Harakeh_Identifying_Good_Training_CVPR_2016_paper.html
4	SA Rebuffi, S Ehrhardt, K Han, A Vedaldi…	Semi-supervised learning with scarce annotations	2019	arXiv preprint arXiv …	arxiv.org	https://arxiv.org/abs/1905.08845	https://arxiv.org/abs/1905.08845
4	H Banuqitah, F Eassa, K Jambi…	Two level self-supervised relation extraction from MEDLINE using UMLS	2016	Int. J. Data Min. Knowl …	academia.edu	https://www.academia.edu/download/46160103/6316ijdkp02.pdf	https://www.academia.edu/download/46160103/6316ijdkp02.pdf
4	T Shen, Z Luo, L Zhou, H Deng, R Zhang…	Beyond photometric loss for self-supervised ego-motion estimation	2019	… on Robotics and …	ieeexplore.ieee.org	https://ieeexplore.ieee.org/abstract/document/8793479/	https://ieeexplore.ieee.org/abstract/document/8793479/
4	JC Su, S Maji, B Hariharan	Boosting supervision with self-supervision for few-shot learning	2019	arXiv preprint arXiv:1906.07079	arxiv.org	https://arxiv.org/abs/1906.07079	https://arxiv.org/abs/1906.07079
4	Z Lingwei, WU Zhenxing, DU Wencai	Improved self supervised learning collection intelligence based high performance data clustering approach	2016	Journal of Chongqing university of posts and …
4	P Mangla, N Kumari, A Sinha…	Charting the right manifold: Manifold mixup for few-shot learning	2020	The IEEE Winter …	openaccess.thecvf.com	http://openaccess.thecvf.com/content_WACV_2020/html/Mangla_Charting_the_Right_Manifold_Manifold_Mixup_for_Few-shot_Learning_WACV_2020_paper.html	http://openaccess.thecvf.com/content_WACV_2020/html/Mangla_Charting_the_Right_Manifold_Manifold_Mixup_for_Few-shot_Learning_WACV_2020_paper.html
4	JC Su, S Maji, B Hariharan	When Does Self-supervision Improve Few-shot Learning?	2019	arXiv preprint arXiv:1910.03560	arxiv.org	https://arxiv.org/abs/1910.03560	https://arxiv.org/abs/1910.03560
4	A Khan, V Kumar, A Ribeiro	Learning Sample-Efficient Target Reaching for Mobile Robots	2018	2018 IEEE/RSJ International …	ieeexplore.ieee.org	https://ieeexplore.ieee.org/abstract/document/8594168/	https://ieeexplore.ieee.org/abstract/document/8594168/
4	Y Chebotar, A Molchanov, S Bechtle, L Righetti…	Meta-learning via learned loss	2019	arXiv preprint arXiv …	arxiv.org	https://arxiv.org/abs/1906.05374	https://arxiv.org/abs/1906.05374
4	R Gomez, L Gomez, J Gibert…	Learning to learn from web data through deep semantic embeddings	2018	Proceedings of the …	openaccess.thecvf.com	http://openaccess.thecvf.com/content_eccv_2018_workshops/w35/html/Gomez_Learning_to_Learn_from_Web_Data_through_Deep_Semantic_Embeddings_ECCVW_2018_paper.html	http://openaccess.thecvf.com/content_eccv_2018_workshops/w35/html/Gomez_Learning_to_Learn_from_Web_Data_through_Deep_Semantic_Embeddings_ECCVW_2018_paper.html
4	E Pot, A Toshev, J Kosecka	Self-supervisory signals for object discovery and detection	2018	arXiv preprint arXiv:1806.03370	arxiv.org	https://arxiv.org/abs/1806.03370	https://arxiv.org/abs/1806.03370
4	R Droste, Y Cai, H Sharma, P Chatelain…	Ultrasound Image Representation Learning by Modeling Sonographer Visual Attention	2019	… Processing in Medical …	Springer	https://link.springer.com/chapter/10.1007/978-3-030-20351-1_46	https://link.springer.com/chapter/10.1007/978-3-030-20351-1_46
4	S Löwe, P O'Connor, B Veeling	Putting An End to End-to-End: Gradient-Isolated Learning of Representations	2019	Advances in Neural Information …	papers.nips.cc	http://papers.nips.cc/paper/8568-putting-an-end-to-end-to-end-gradient-isolated-learning-of-representations	http://papers.nips.cc/paper/8568-putting-an-end-to-end-to-end-gradient-isolated-learning-of-representations
4	YS Huang, SY Chou, YH Yang	Generating music medleys via playing music puzzle games	2018	Thirty-Second AAAI Conference on …	aaai.org	https://www.aaai.org/ocs/index.php/AAAI/AAAI18/paper/viewPaper/16174	https://www.aaai.org/ocs/index.php/AAAI/AAAI18/paper/viewPaper/16174
4	RA Roller, M Stevenson	Held-out versus Gold Standard: Comparison of Evaluation Strategies for Distantly Supervised Relation Extraction from Medline abstracts	2015	Proceedings of the Sixth …	eprints.whiterose.ac.uk	http://eprints.whiterose.ac.uk/90280/	http://eprints.whiterose.ac.uk/90280/
4	F Schrodt, MV Butz	Modeling perspective-taking by forecasting 3D biological motion sequences	2014	Cognitive Processing, Supplementary KogWis	Springer	https://link.springer.com/content/pdf/10.1007/s10339-014-0632-2.pdf#page=137	https://link.springer.com/content/pdf/10.1007/s10339-014-0632-2.pdf#page=137
4	F Schrodt, G Layher, H Neumann…	Modeling perspective-taking upon observation of 3D biological motion	2014	… on Development and …	ieeexplore.ieee.org	https://ieeexplore.ieee.org/abstract/document/6982998/	https://ieeexplore.ieee.org/abstract/document/6982998/
4	Y Sun, X Wang, Z Liu, J Miller, AA Efros…	Test-time training for out-of-distribution generalization	2019	arXiv preprint arXiv …	arxiv.org	https://arxiv.org/abs/1909.13231	https://arxiv.org/abs/1909.13231
4	Q Sun, X Li, Y Liu, S Zheng, TS Chua…	Learning to self-train for semi-supervised few-shot classification	2019	arXiv preprint arXiv …	arxiv.org	https://arxiv.org/abs/1906.00562	https://arxiv.org/abs/1906.00562
4	S Nam, Y Hahm, S Nam…	SRDF: Korean Open Information Extraction using Singleton Property.	2015	… Web Conference (Posters …	semanticweb.kaist.ac.kr	http://semanticweb.kaist.ac.kr/home/images/f/f5/SRDF_Korean_Open_Information_Extraction_using_Singleton_Property.pdf	http://semanticweb.kaist.ac.kr/home/images/f/f5/SRDF_Korean_Open_Information_Extraction_using_Singleton_Property.pdf
4	F Schrodt, G Layher, H Neumann…	Modeling perspective-taking by correlating visual and proprioceptive dynamics	2014	Proceedings of the …	escholarship.org	https://escholarship.org/content/qt6nw2b977/qt6nw2b977.pdf	https://escholarship.org/content/qt6nw2b977/qt6nw2b977.pdf
4	H Lee, K Kwak, S Jo	An incremental nonparametric Bayesian clustering-based traversable region detection method	2017	Autonomous Robots	Springer	https://link.springer.com/article/10.1007/s10514-016-9588-7	https://link.springer.com/article/10.1007/s10514-016-9588-7
4	PH Christiansen, MF Kragh, Y Brodskiy…	Unsuperpoint: End-to-end unsupervised interest point detector and descriptor	2019	arXiv preprint arXiv …	arxiv.org	https://arxiv.org/abs/1907.04011	https://arxiv.org/abs/1907.04011
4	I Sur, HB Amor	Robots that anticipate pain: Anticipating physical perturbations from visual cues through deep predictive models	2017	2017 IEEE/RSJ International Conference on …	ieeexplore.ieee.org	https://ieeexplore.ieee.org/abstract/document/8206442/	https://ieeexplore.ieee.org/abstract/document/8206442/
4	I Ustyuzhaninov, C Michaelis, W Brendel…	One-shot texture segmentation	2018	arXiv preprint arXiv …	arxiv.org	https://arxiv.org/abs/1807.02654	https://arxiv.org/abs/1807.02654
4	H Jiang, D Sun, V Jampani, Z Lv…	Sense: A shared encoder network for scene-flow estimation	2019	Proceedings of the …	openaccess.thecvf.com	http://openaccess.thecvf.com/content_ICCV_2019/html/Jiang_SENSE_A_Shared_Encoder_Network_for_Scene-Flow_Estimation_ICCV_2019_paper.html	http://openaccess.thecvf.com/content_ICCV_2019/html/Jiang_SENSE_A_Shared_Encoder_Network_for_Scene-Flow_Estimation_ICCV_2019_paper.html
3	A Taha, M Meshry, X Yang, YT Chen…	Two stream self-supervised learning for action recognition	2018	arXiv preprint arXiv …	arxiv.org	https://arxiv.org/abs/1806.07383	https://arxiv.org/abs/1806.07383
3	M Ravanelli, J Zhong, S Pascual…	Multi-task self-supervised learning for Robust Speech Recognition	2020	arXiv preprint arXiv …	arxiv.org	https://arxiv.org/abs/2001.09239	https://arxiv.org/abs/2001.09239
3	O Senouf, S Vedula, T Weiss, A Bronstein…	Self-supervised learning of inverse problem solvers in medical imaging	2019	Domain Adaptation and …	Springer	https://link.springer.com/chapter/10.1007/978-3-030-33391-1_13	https://link.springer.com/chapter/10.1007/978-3-030-33391-1_13
3	C Oh, B Ham, H Kim, A Hilton, K Sohn	OCEAN: Object-centric arranging network for self-supervised visual representations learning	2019	Expert Systems with Applications	Elsevier	https://www.sciencedirect.com/science/article/pii/S0957417419300909	https://www.sciencedirect.com/science/article/pii/S0957417419300909
3	H Zhan, CS Weerasekera, R Garg…	Self-supervised learning for single view depth and surface normal estimation	2019	… Conference on Robotics …	ieeexplore.ieee.org	https://ieeexplore.ieee.org/abstract/document/8793984/	https://ieeexplore.ieee.org/abstract/document/8793984/
3	X Shu, C Liu, T Li, C Wang, C Chi	A self-supervised learning manipulator grasping approach based on instance segmentation	2018	IEEE Access	ieeexplore.ieee.org	https://ieeexplore.ieee.org/abstract/document/8506350/	https://ieeexplore.ieee.org/abstract/document/8506350/
3	B Yaman, SAH Hosseini, S Moeller, J Ellermann…	Self-Supervised Physics-Based Deep Learning MRI Reconstruction Without Fully-Sampled Data	2019	arXiv preprint arXiv …	arxiv.org	https://arxiv.org/abs/1910.09116	https://arxiv.org/abs/1910.09116
3	A Fragkiadaki, B Seybold, C Schmid, R Sukthankar…	Self-supervised learning of structure and motion from video	2017		research.google	http://research.google/pubs/pub46199/	http://research.google/pubs/pub46199/
3	A Saeed, T Ozcelebi, J Lukkien	Multi-task Self-Supervised Learning for Human Activity Detection	2019	Proceedings of the ACM on Interactive …	dl.acm.org	https://dl.acm.org/doi/abs/10.1145/3328932	https://dl.acm.org/doi/abs/10.1145/3328932
3	Y Wang, JM Solomon	PRNet: Self-Supervised Learning for Partial-to-Partial Registration	2019	Advances in Neural Information Processing …	papers.nips.cc	http://papers.nips.cc/paper/9085-prnet-self-supervised-learning-for-partial-to-partial-registration	http://papers.nips.cc/paper/9085-prnet-self-supervised-learning-for-partial-to-partial-registration
3	C da Costa Rocha, N Padoy…	Self-supervised surgical tool segmentation using kinematic information	2019	… Conference on Robotics …	ieeexplore.ieee.org	https://ieeexplore.ieee.org/abstract/document/8794334/	https://ieeexplore.ieee.org/abstract/document/8794334/
3	Q Sun, Y Tang, C Zhao	Cycle-SfM: Joint self-supervised learning of depth and camera motion from monocular image sequences	2019	Chaos: An Interdisciplinary Journal of …	aip.scitation.org	https://aip.scitation.org/doi/abs/10.1063/1.5120605	https://aip.scitation.org/doi/abs/10.1063/1.5120605
3	V Röthlingshöfer, V Sharma…	Self-supervised Face-Grouping on Graphs	2019	Proceedings of the 27th …	dl.acm.org	https://dl.acm.org/doi/abs/10.1145/3343031.3351071	https://dl.acm.org/doi/abs/10.1145/3343031.3351071
3	J Xu, S Zhu, H Guo, S Wu	Avoidance of manual labeling in robotic autonomous navigation through multi-sensory semi-supervised learning	2017	arXiv preprint arXiv:1709.07911	arxiv.org	https://arxiv.org/abs/1709.07911	https://arxiv.org/abs/1709.07911
3	GA Carpenter	Looking to the future: Learning from experience, averting catastrophe	2019	Neural Networks	Elsevier	https://www.sciencedirect.com/science/article/pii/S0893608019302837	https://www.sciencedirect.com/science/article/pii/S0893608019302837
3	Y Xing, R Tewari, P Mendonca	A Self-Supervised Bootstrap Method for Single-Image 3D Face Reconstruction	2019	2019 IEEE Winter Conference …	ieeexplore.ieee.org	https://ieeexplore.ieee.org/abstract/document/8658722/	https://ieeexplore.ieee.org/abstract/document/8658722/
3	A Pirinen, E Gärtner, C Sminchisescu	Domes to drones: Self-supervised active triangulation for 3d human pose reconstruction	2019	Advances in Neural …	papers.nips.cc	http://papers.nips.cc/paper/8646-domes-to-drones-self-supervised-active-triangulation-for-3d-human-pose-reconstruction	http://papers.nips.cc/paper/8646-domes-to-drones-self-supervised-active-triangulation-for-3d-human-pose-reconstruction
3	M Belghazi, M Oquab, D Lopez-Paz	Learning about an exponential amount of conditional distributions	2019	Advances in Neural …	papers.nips.cc	http://papers.nips.cc/paper/9523-learning-about-an-exponential-amount-of-conditional-distributions	http://papers.nips.cc/paper/9523-learning-about-an-exponential-amount-of-conditional-distributions
3	YM Asano, C Rupprecht, A Vedaldi	Surprising effectiveness of few-image unsupervised feature learning	2019	arXiv preprint arXiv:1904.13132	arxiv.org	https://arxiv.org/abs/1904.13132	https://arxiv.org/abs/1904.13132
3	A Zisserman	Self-supervised learning	2018
3	SA Javed, S Saxena, V Gandhi	Learning unsupervised visual grounding through semantic self-supervision	2018	arXiv preprint arXiv:1803.06506	arxiv.org	https://arxiv.org/abs/1803.06506	https://arxiv.org/abs/1803.06506
3	MY Lu, RJ Chen, J Wang, D Dillon…	Semi-supervised histology classification using deep multiple instance learning and contrastive predictive coding	2019	arXiv preprint arXiv …	arxiv.org	https://arxiv.org/abs/1910.10825	https://arxiv.org/abs/1910.10825
3	SN Aakur, S Sarkar	A Perceptual Prediction Framework for Self Supervised Event Segmentation	2019	… of the IEEE Conference on Computer …	openaccess.thecvf.com	http://openaccess.thecvf.com/content_CVPR_2019/html/Aakur_A_Perceptual_Prediction_Framework_for_Self_Supervised_Event_Segmentation_CVPR_2019_paper.html	http://openaccess.thecvf.com/content_CVPR_2019/html/Aakur_A_Perceptual_Prediction_Framework_for_Self_Supervised_Event_Segmentation_CVPR_2019_paper.html
3	AJR Simpson	Use it or Lose it: Selective Memory and Forgetting in a Perpetual Learning Machine	2015	arXiv preprint arXiv:1509.03185	arxiv.org	https://arxiv.org/abs/1509.03185	https://arxiv.org/abs/1509.03185
3	P Florence, L Manuelli…	Self-Supervised Correspondence in Visuomotor Policy Learning	2019	IEEE Robotics and …	ieeexplore.ieee.org	https://ieeexplore.ieee.org/abstract/document/8917583/	https://ieeexplore.ieee.org/abstract/document/8917583/
3	D Ruiter, C Espana-Bonet, J van Genabith	Self-Supervised Neural Machine Translation	2019	Proceedings of the 57th …	aclweb.org	https://www.aclweb.org/anthology/P19-1178/?utm_campaign=piqcy&utm_medium=email&utm_source=Revue%20newsletter	https://www.aclweb.org/anthology/P19-1178/?utm_campaign=piqcy&utm_medium=email&utm_source=Revue%20newsletter
3	MA Lee, Y Zhu, P Zachares, M Tan…	Making sense of vision and touch: Learning multimodal representations for contact-rich tasks	2020	IEEE Transactions …	ieeexplore.ieee.org	https://ieeexplore.ieee.org/abstract/document/9043710/	https://ieeexplore.ieee.org/abstract/document/9043710/
3	X Chen, J Song, O Hilliges	NVS machines: Learning novel view synthesis with fine-grained view control	2019	arXiv preprint arXiv …	pdfs.semanticscholar.org	https://pdfs.semanticscholar.org/a490/f41363bd8bf099d26bcc520556ce917d64bd.pdf	https://pdfs.semanticscholar.org/a490/f41363bd8bf099d26bcc520556ce917d64bd.pdf
3	S Pirk, M Khansari, Y Bai, C Lynch…	Online Object Representations with Contrastive Learning	2019	arXiv preprint arXiv …	arxiv.org	https://arxiv.org/abs/1906.04312	https://arxiv.org/abs/1906.04312
3	N Chesneau, K Alahari…	Learning from Web Videos for Event Classification	2017	IEEE Transactions on …	ieeexplore.ieee.org	https://ieeexplore.ieee.org/abstract/document/8076905/	https://ieeexplore.ieee.org/abstract/document/8076905/
3	R Sousa, AR da Rocha Neto, JS Cardoso…	Classification with reject option using the self-organizing map	2014	… Conference on Artificial …	Springer	https://link.springer.com/chapter/10.1007/978-3-319-11179-7_14	https://link.springer.com/chapter/10.1007/978-3-319-11179-7_14
3	J Shi, F Fu, Y Wang, J Wang	A novel path segmentation method for autonomous road following	2016	2016 IEEE International …	ieeexplore.ieee.org	https://ieeexplore.ieee.org/abstract/document/7753701/	https://ieeexplore.ieee.org/abstract/document/7753701/
3	Z Cao, A Kar, C Hane, J Malik	Learning independent object motion from unlabelled stereoscopic videos	2019	Proceedings of the IEEE …	openaccess.thecvf.com	http://openaccess.thecvf.com/content_CVPR_2019/html/Cao_Learning_Independent_Object_Motion_From_Unlabelled_Stereoscopic_Videos_CVPR_2019_paper.html	http://openaccess.thecvf.com/content_CVPR_2019/html/Cao_Learning_Independent_Object_Motion_From_Unlabelled_Stereoscopic_Videos_CVPR_2019_paper.html
3	V Spruyt	Loc2Vec: Learning location embeddings with triplet-loss networks	2018		sentiance.com	https://www.sentiance.com/2018/05/03/venue-mapping/	https://www.sentiance.com/2018/05/03/venue-mapping/
3	S Vitale	A CNN-Based Pansharpening Method with Perceptual Loss	2019	IGARSS 2019-2019 IEEE International Geoscience …	ieeexplore.ieee.org	https://ieeexplore.ieee.org/abstract/document/8900390/	https://ieeexplore.ieee.org/abstract/document/8900390/
3	P Sharma, D Pathak, A Gupta	Third-Person Visual Imitation Learning via Decoupled Hierarchical Controller	2019	Advances in Neural Information …	papers.nips.cc	http://papers.nips.cc/paper/8528-third-person-visual-imitation-learning-via-decoupled-hierarchical-controller	http://papers.nips.cc/paper/8528-third-person-visual-imitation-learning-via-decoupled-hierarchical-controller
3	B Bozorgtabar, MS Rad…	SynDeMo: Synergistic Deep Feature Alignment for Joint Learning of Depth and Ego-Motion	2019	Proceedings of the …	openaccess.thecvf.com	http://openaccess.thecvf.com/content_ICCV_2019/html/Bozorgtabar_SynDeMo_Synergistic_Deep_Feature_Alignment_for_Joint_Learning_of_Depth_ICCV_2019_paper.html	http://openaccess.thecvf.com/content_ICCV_2019/html/Bozorgtabar_SynDeMo_Synergistic_Deep_Feature_Alignment_for_Joint_Learning_of_Depth_ICCV_2019_paper.html
3	Y Shen, M Gao	Brain tumor segmentation on MRI with missing modalities	2019	International Conference on Information Processing in …	Springer	https://link.springer.com/chapter/10.1007/978-3-030-20351-1_32	https://link.springer.com/chapter/10.1007/978-3-030-20351-1_32
3	J Dong, B Boots, F Dellaert…	Learning to align images using weak geometric supervision	2018	… Conference on 3D …	ieeexplore.ieee.org	https://ieeexplore.ieee.org/abstract/document/8491023/	https://ieeexplore.ieee.org/abstract/document/8491023/
3	Y Babakhin, A Sanakoyeu, H Kitamura	Semi-Supervised Segmentation of Salt Bodies in Seismic Images using an Ensemble of Convolutional Neural Networks	2019	German Conference on Pattern …	Springer	https://link.springer.com/chapter/10.1007/978-3-030-33676-9_15	https://link.springer.com/chapter/10.1007/978-3-030-33676-9_15
3	D Rao, F Visin, A Rusu, R Pascanu, YW Teh…	Continual Unsupervised Representation Learning	2019	Advances in Neural …	papers.nips.cc	http://papers.nips.cc/paper/8981-continual-unsupervised-representation-learning	http://papers.nips.cc/paper/8981-continual-unsupervised-representation-learning
2	R Sun, Y Gao, Z Fang, A Wang, C Zhong	SSL-Net: Point-cloud generation network with self-supervised learning	2019	IEEE Access	ieeexplore.ieee.org	https://ieeexplore.ieee.org/abstract/document/8740985/	https://ieeexplore.ieee.org/abstract/document/8740985/
2	G Kahn, P Abbeel, S Levine	BADGR: An Autonomous Self-Supervised Learning-Based Navigation System	2020	arXiv preprint arXiv:2002.05700	arxiv.org	https://arxiv.org/abs/2002.05700	https://arxiv.org/abs/2002.05700
2	P Knöbelreiter, C Vogel, T Pock	Self-Supervised Learning for Stereo Reconstruction on Aerial Images	2018	IGARSS 2018-2018 IEEE …	ieeexplore.ieee.org	https://ieeexplore.ieee.org/abstract/document/8518316/	https://ieeexplore.ieee.org/abstract/document/8518316/
2	L Berscheid, T Rühr, T Kröger	Improving data efficiency of self-supervised learning for robotic grasping	2019	2019 International Conference …	ieeexplore.ieee.org	https://ieeexplore.ieee.org/abstract/document/8793952/	https://ieeexplore.ieee.org/abstract/document/8793952/
2	M Mostajabi, N Kolkin, G Shakhnarovich	Diverse sampling for self-supervised learning of semantic segmentation	2016	arXiv preprint arXiv:1612.01991	arxiv.org	https://arxiv.org/abs/1612.01991	https://arxiv.org/abs/1612.01991
2	K Sun, Z Lin, Z Zhu	Multi-Stage Self-Supervised Learning for Graph Convolutional Networks on Graphs with Few Labels	2019	arXiv preprint arXiv:1902.11038	arxiv.org	https://arxiv.org/abs/1902.11038	https://arxiv.org/abs/1902.11038
2	Y Patel, L Gomez, R Gomez, M Rusiñol…	TextTopicNet-Self-Supervised Learning of Visual Features Through Embedding Images on Semantic Text Spaces	2018	arXiv preprint arXiv …	arxiv.org	https://arxiv.org/abs/1807.02110	https://arxiv.org/abs/1807.02110
2	Q Shao, J Hu, W Wang, Y Fang, W Liu…	Suction Grasp Region Prediction using Self-supervised Learning for Object Picking in Dense Clutter	2019	2019 IEEE 5th …	ieeexplore.ieee.org	https://ieeexplore.ieee.org/abstract/document/8835468/	https://ieeexplore.ieee.org/abstract/document/8835468/
2	R Guilherme, F Marques, A Lourenço…	Context-aware switching between localisation methods for robust robot navigation: A self-supervised learning approach	2016	… on Systems, Man …	ieeexplore.ieee.org	https://ieeexplore.ieee.org/abstract/document/7844916/	https://ieeexplore.ieee.org/abstract/document/7844916/
2	P Xu, Z Song, Q Yin, YZ Song, L Wang	Deep Self-Supervised Representation Learning for Free-Hand Sketch	2020	arXiv preprint arXiv:2002.00867	arxiv.org	https://arxiv.org/abs/2002.00867	https://arxiv.org/abs/2002.00867
2	E Amrani, R Ben-Ari, T Hakim, A Bronstein	Toward self-supervised object detection in unlabeled videos	2019	arXiv preprint arXiv …	arxiv.org	https://arxiv.org/abs/1905.11137	https://arxiv.org/abs/1905.11137
2	S Hyun Lee, D Ha Kim…	Self-supervised Knowledge Distillation Using Singular Value Decomposition	2018	Proceedings of the …	openaccess.thecvf.com	http://openaccess.thecvf.com/content_ECCV_2018/html/SEUNG_HYUN_LEE_Self-supervised_Knowledge_Distillation_ECCV_2018_paper.html	http://openaccess.thecvf.com/content_ECCV_2018/html/SEUNG_HYUN_LEE_Self-supervised_Knowledge_Distillation_ECCV_2018_paper.html
2	NT Tran, VH Tran, NB Nguyen, NM Cheung	An Improved Self-supervised GAN via Adversarial Training	2019	arXiv preprint arXiv …	arxiv.org	https://arxiv.org/abs/1905.05469	https://arxiv.org/abs/1905.05469
2	T Chen, X Zhai, N Houlsby	Self-supervised gan to counter forgetting	2018	arXiv preprint arXiv:1810.11598	arxiv.org	https://arxiv.org/abs/1810.11598	https://arxiv.org/abs/1810.11598
2	Y Wang, J Mei, L Zhang, B Zhang…	Self-supervised feature learning with crf embedding for hyperspectral image classification	2018	IEEE Transactions on …	ieeexplore.ieee.org	https://ieeexplore.ieee.org/abstract/document/8548579/	https://ieeexplore.ieee.org/abstract/document/8548579/
2	C Mitash, K Wang, KE Bekris…	Physics-aware Self-supervised Training of CNNs for Object Detection	2017	… Conference on Robotics …	cs.rutgers.edu	https://www.cs.rutgers.edu/~kb572/pubs/physics_aware_object_detection.pdf	https://www.cs.rutgers.edu/~kb572/pubs/physics_aware_object_detection.pdf
2	A Bouchachia, A Ortner	Self-learning recursive neural networks for structured data classification	2014	2014 International Joint Conference …	ieeexplore.ieee.org	https://ieeexplore.ieee.org/abstract/document/6889804/	https://ieeexplore.ieee.org/abstract/document/6889804/
2	M Goldman, T Hassner…	Learn stereo, infer mono: Siamese networks for self-supervised, monocular, depth estimation	2019	Proceedings of the IEEE …	openaccess.thecvf.com	http://openaccess.thecvf.com/content_CVPRW_2019/html/PCV/Goldman_Learn_Stereo_Infer_Mono_Siamese_Networks_for_Self-Supervised_Monocular_Depth_CVPRW_2019_paper.html	http://openaccess.thecvf.com/content_CVPRW_2019/html/PCV/Goldman_Learn_Stereo_Infer_Mono_Siamese_Networks_for_Self-Supervised_Monocular_Depth_CVPRW_2019_paper.html
2	H Jiang, E Learned-Miller, G Larsson, M Maire…	Self-Supervised Relative Depth Learning for Urban Scene Understanding	2017	arXiv preprint arXiv …	arxiv.org	https://arxiv.org/abs/1712.04850	https://arxiv.org/abs/1712.04850
2	J Qiu, Y Sun	Self-supervised iterative refinement learning for macular OCT volumetric data classification	2019	Computers in biology and medicine	Elsevier	https://www.sciencedirect.com/science/article/pii/S0010482519301969	https://www.sciencedirect.com/science/article/pii/S0010482519301969
2	M Cartwright, J Cramer, J Salamon…	TriCycle: Audio representation learning from sensor network data using self-supervision	2019	2019 IEEE Workshop …	ieeexplore.ieee.org	https://ieeexplore.ieee.org/abstract/document/8937265/	https://ieeexplore.ieee.org/abstract/document/8937265/
2	W Shimoda, K Yanai	Self-supervised difference detection for weakly-supervised semantic segmentation	2019	Proceedings of the IEEE …	openaccess.thecvf.com	http://openaccess.thecvf.com/content_ICCV_2019/html/Shimoda_Self-Supervised_Difference_Detection_for_Weakly-Supervised_Semantic_Segmentation_ICCV_2019_paper.html	http://openaccess.thecvf.com/content_ICCV_2019/html/Shimoda_Self-Supervised_Difference_Detection_for_Weakly-Supervised_Semantic_Segmentation_ICCV_2019_paper.html
2	J Li, J Liu, Y Wong, S Nishimura…	Self-supervised Representation Learning Using 360° Data	2019	Proceedings of the 27th …	dl.acm.org	https://dl.acm.org/doi/abs/10.1145/3343031.3351019	https://dl.acm.org/doi/abs/10.1145/3343031.3351019
2	Z Laskar, J Kannala	Semi-Supervised Semantic Matching.	2018	Proceedings of the European …	openaccess.thecvf.com	http://openaccess.thecvf.com/content_eccv_2018_workshops/w16/html/Laskar_Semi-Supervised_Semantic_Matching._ECCVW_2018_paper.html	http://openaccess.thecvf.com/content_eccv_2018_workshops/w16/html/Laskar_Semi-Supervised_Semantic_Matching._ECCVW_2018_paper.html
2	Z Feng, C Xu, D Tao	Self-Supervised Representation Learning From Multi-Domain Data	2019	Proceedings of the IEEE International …	openaccess.thecvf.com	http://openaccess.thecvf.com/content_ICCV_2019/html/Feng_Self-Supervised_Representation_Learning_From_Multi-Domain_Data_ICCV_2019_paper.html	http://openaccess.thecvf.com/content_ICCV_2019/html/Feng_Self-Supervised_Representation_Learning_From_Multi-Domain_Data_ICCV_2019_paper.html
2	J Sauder, B Sievers	Self-Supervised Deep Learning on Point Clouds by Reconstructing Space	2019	Advances in Neural Information Processing …	papers.nips.cc	http://papers.nips.cc/paper/9455-self-supervised-deep-learning-on-point-clouds-by-reconstructing-space	http://papers.nips.cc/paper/9455-self-supervised-deep-learning-on-point-clouds-by-reconstructing-space
2	S Wang, W Che, Q Liu, P Qin, T Liu…	Multi-Task Self-Supervised Learning for Disfluency Detection	2019	arXiv preprint arXiv …	arxiv.org	https://arxiv.org/abs/1908.05378	https://arxiv.org/abs/1908.05378
2	M Larsson, E Stenborg, C Toft…	Fine-grained segmentation networks: Self-supervised segmentation for improved long-term visual localization	2019	Proceedings of the …	openaccess.thecvf.com	http://openaccess.thecvf.com/content_ICCV_2019/html/Larsson_Fine-Grained_Segmentation_Networks_Self-Supervised_Segmentation_for_Improved_Long-Term_Visual_Localization_ICCV_2019_paper.html	http://openaccess.thecvf.com/content_ICCV_2019/html/Larsson_Fine-Grained_Segmentation_Networks_Self-Supervised_Segmentation_for_Improved_Long-Term_Visual_Localization_ICCV_2019_paper.html
2	X Liu, A Sinha, M Ishii, GD Hager…	Dense Depth Estimation in Monocular Endoscopy with Self-supervised Learning Methods	2019	IEEE transactions on …	ieeexplore.ieee.org	https://ieeexplore.ieee.org/abstract/document/8889760/	https://ieeexplore.ieee.org/abstract/document/8889760/
2	P West, A Holtzman, J Buys, Y Choi	BottleSum: Unsupervised and Self-supervised Sentence Summarization using the Information Bottleneck Principle	2019	arXiv preprint arXiv:1909.07405	arxiv.org	https://arxiv.org/abs/1909.07405	https://arxiv.org/abs/1909.07405
2	M Blendowski, H Nickisch, MP Heinrich	How to Learn from Unlabeled Volume Data: Self-supervised 3D Context Feature Learning	2019	International Conference on …	Springer	https://link.springer.com/chapter/10.1007/978-3-030-32226-7_72	https://link.springer.com/chapter/10.1007/978-3-030-32226-7_72
2	A Thabet, H Alwassel, B Ghanem	MortonNet: Self-Supervised Learning of Local Features in 3D Point Clouds	2019	arXiv preprint arXiv:1904.00230	arxiv.org	https://arxiv.org/abs/1904.00230	https://arxiv.org/abs/1904.00230
2	C Doersch	Supervision Beyond Manual Annotations for Learning Visual Representations	2016		kilthub.cmu.edu	https://kilthub.cmu.edu/articles/Supervision_Beyond_Manual_Annotations_for_Learning_Visual_Representations/6723383	https://kilthub.cmu.edu/articles/Supervision_Beyond_Manual_Annotations_for_Learning_Visual_Representations/6723383
2	MA Bautista, P Fuchs, B Ommer	Learning where to drive by watching others	2017	German Conference on Pattern …	Springer	https://link.springer.com/chapter/10.1007/978-3-319-66709-6_3	https://link.springer.com/chapter/10.1007/978-3-319-66709-6_3
2	AS Koepke, O Wiles, A Zisserman	Self-supervised learning of a facial attribute embedding from video.	2018	BMVC
2	P Sermanet, C Lynch, J Hsu, S Levine	Time-Contrastive Networks: Self-Supervised Learning from Multi-View Observation. CoRR abs/1704.06888 (2017)	2017	arXiv preprint arXiv:1704.06888
2	Z Lan, M Chen, S Goodman, K Gimpel, P Sharma…	ALBERT: A Lite BERT for Self-supervised Learning of Language Representations.(Sept	2019	arXiv preprint cs.CL …
2	Z Suyang, H Haotian, Q Longhua, Z Min	Family relation extraction from Wikipedia by self-supervised learning	2015	Computer application
2	E Mitchell, S Keselj, S Popovych, D Buniatyan…	Siamese encoding and alignment by multiscale learning with self-supervision	2019	arXiv preprint arXiv …	arxiv.org	https://arxiv.org/abs/1904.02643	https://arxiv.org/abs/1904.02643
2	W Lee, J Na, G Kim	Multi-task Self-supervised Object Detection via Recycling of Bounding Box Annotations	2019	… of the IEEE Conference on Computer …	openaccess.thecvf.com	http://openaccess.thecvf.com/content_CVPR_2019/html/Lee_Multi-Task_Self-Supervised_Object_Detection_via_Recycling_of_Bounding_Box_Annotations_CVPR_2019_paper.html	http://openaccess.thecvf.com/content_CVPR_2019/html/Lee_Multi-Task_Self-Supervised_Object_Detection_via_Recycling_of_Bounding_Box_Annotations_CVPR_2019_paper.html
2	S Li, F Xue, X Wang, Z Yan…	Sequential Adversarial Learning for Self-Supervised Deep Visual Odometry	2019	Proceedings of the IEEE …	openaccess.thecvf.com	http://openaccess.thecvf.com/content_ICCV_2019/html/Li_Sequential_Adversarial_Learning_for_Self-Supervised_Deep_Visual_Odometry_ICCV_2019_paper.html	http://openaccess.thecvf.com/content_ICCV_2019/html/Li_Sequential_Adversarial_Learning_for_Self-Supervised_Deep_Visual_Odometry_ICCV_2019_paper.html
2	Y Wang, J Zhang, M Kan, S Shan, X Chen	Self-supervised Scale Equivariant Network for Weakly Supervised Semantic Segmentation	2019	arXiv preprint arXiv …	arxiv.org	https://arxiv.org/abs/1909.03714	https://arxiv.org/abs/1909.03714
2	A Nair, S Bahl, A Khazatsky, V Pong, G Berseth…	Contextual Imagined Goals for Self-Supervised Robotic Learning	2019	arXiv preprint arXiv …	arxiv.org	https://arxiv.org/abs/1910.11670	https://arxiv.org/abs/1910.11670
2	C Dias, M Dimiccoli	Learning event representations by encoding the temporal context	2018	Proceedings of the European …	openaccess.thecvf.com	http://openaccess.thecvf.com/content_eccv_2018_workshops/w17/html/Dias_Learning_event_representations_by_encoding_the_temporal_context_ECCVW_2018_paper.html	http://openaccess.thecvf.com/content_eccv_2018_workshops/w17/html/Dias_Learning_event_representations_by_encoding_the_temporal_context_ECCVW_2018_paper.html
2	K Stefanov, J Beskow, G Salvi	Self-Supervised Vision-Based Detection of the Active Speaker as Support for Socially-Aware Language Acquisition	2019	IEEE Transactions on …	ieeexplore.ieee.org	https://ieeexplore.ieee.org/abstract/document/8758947/	https://ieeexplore.ieee.org/abstract/document/8758947/
2	K Saito, D Kim, S Sclaroff, K Saenko	Universal domain adaptation through self supervision	2020	arXiv preprint arXiv:2002.07953	arxiv.org	https://arxiv.org/abs/2002.07953	https://arxiv.org/abs/2002.07953
2	T Gauthier	Deep Reinforcement Learning in HOL4	2019	arXiv preprint arXiv:1910.11797	arxiv.org	https://arxiv.org/abs/1910.11797	https://arxiv.org/abs/1910.11797
2	R Gomez, L Gomez, J Gibert…	Learning from Barcelona Instagram data what Locals and Tourists post about its Neighbourhoods	2018	Proceedings of the …	openaccess.thecvf.com	http://openaccess.thecvf.com/content_eccv_2018_workshops/w35/html/Gomez_Learning_from_Barcelona_Instagram_data_what_Locals_and_Tourists_post_ECCVW_2018_paper.html	http://openaccess.thecvf.com/content_eccv_2018_workshops/w35/html/Gomez_Learning_from_Barcelona_Instagram_data_what_Locals_and_Tourists_post_ECCVW_2018_paper.html
2	V Stojnić, V Risojević	Evaluation of Split-Brain Autoencoders for High-Resolution Remote Sensing Scene Classification	2018	2018 International Symposium ELMAR	ieeexplore.ieee.org	https://ieeexplore.ieee.org/abstract/document/8534634/	https://ieeexplore.ieee.org/abstract/document/8534634/
2	H Yu, M Cai, Y Liu, F Lu	What I See Is What You See: Joint Attention Learning for First and Third Person Video Co-analysis	2019	Proceedings of the 27th ACM International …	dl.acm.org	https://dl.acm.org/doi/abs/10.1145/3343031.3350896	https://dl.acm.org/doi/abs/10.1145/3343031.3350896
2	L Annabi, MG Ortiz	State representation learning with recurrent capsule networks	2018	arXiv preprint arXiv:1812.11202	arxiv.org	https://arxiv.org/abs/1812.11202	https://arxiv.org/abs/1812.11202
2	D Konar, S Bhattacharyya, BK Panigrahi…	An efficient pure color image denoising using quantum parallel bidirectional self-organizing neural network architecture	2017	Quantum Inspired …	Elsevier	https://www.sciencedirect.com/science/article/pii/B978012804409400005X	https://www.sciencedirect.com/science/article/pii/B978012804409400005X
2	A Hajjam	A near-to-far learning framework for terrain characterization using an aerial/ground-vehicle team	2016		digitalcommons.du.edu	https://digitalcommons.du.edu/etd/1202/	https://digitalcommons.du.edu/etd/1202/
2	S Tang, VR de Sa	Multi-view sentence representation learning	2018	arXiv preprint arXiv:1805.07443	arxiv.org	https://arxiv.org/abs/1805.07443	https://arxiv.org/abs/1805.07443
2	G Pandey, A Dukkipati	Unsupervised feature learning with discriminative encoder	2017	2017 IEEE International Conference …	ieeexplore.ieee.org	https://ieeexplore.ieee.org/abstract/document/8215509/	https://ieeexplore.ieee.org/abstract/document/8215509/
2	Z Qin, K Fang, Y Zhu, L Fei-Fei, S Savarese	KETO: Learning Keypoint Representations for Tool Manipulation	2019	arXiv preprint arXiv …	arxiv.org	https://arxiv.org/abs/1910.11977	https://arxiv.org/abs/1910.11977
2	G Bortsova, F Dubost, L Hogeweg…	Semi-supervised Medical Image Segmentation via Learning Consistency Under Transformations	2019	… Conference on Medical …	Springer	https://link.springer.com/chapter/10.1007/978-3-030-32226-7_90	https://link.springer.com/chapter/10.1007/978-3-030-32226-7_90
2	F Pizzati, R Charette, M Zaccaria…	Domain bridge for unpaired image-to-image translation and unsupervised domain adaptation	2020	The IEEE Winter …	openaccess.thecvf.com	http://openaccess.thecvf.com/content_WACV_2020/html/Pizzati_Domain_Bridge_for_Unpaired_Image-to-Image_Translation_and_Unsupervised_Domain_Adaptation_WACV_2020_paper.html	http://openaccess.thecvf.com/content_WACV_2020/html/Pizzati_Domain_Bridge_for_Unpaired_Image-to-Image_Translation_and_Unsupervised_Domain_Adaptation_WACV_2020_paper.html
2	B Zhang, B Chen, J Yang, W Yang, J Zhang	An Unified Intelligence-Communication Model for Multi-Agent System Part-I: Overview	2018	arXiv preprint arXiv …	arxiv.org	https://arxiv.org/abs/1811.09920	https://arxiv.org/abs/1811.09920
2	S Higa, Y Iwashita, K Otsu, M Ono…	Vision-Based Estimation of Driving Energy for Planetary Rovers Using Deep Learning and Terramechanics	2019	IEEE Robotics and …	ieeexplore.ieee.org	https://ieeexplore.ieee.org/abstract/document/8764007/	https://ieeexplore.ieee.org/abstract/document/8764007/
2	Y Jiang, T Peng, N Tan	CP-SSD: Context Information Scene Perception Object Detection Based on SSD	2019	Applied Sciences	mdpi.com	https://www.mdpi.com/2076-3417/9/14/2785	https://www.mdpi.com/2076-3417/9/14/2785
2	C Wang, H Yu, F Wan	Information retrieval technology based on knowledge graph	2018	2018 3rd International Conference on …	atlantis-press.com	https://www.atlantis-press.com/proceedings/icammce-18/25897722	https://www.atlantis-press.com/proceedings/icammce-18/25897722
2	Y Song, Y Tian, G Wang, M Li	2D lidar map prediction via estimating motion flow with GRU	2019	2019 International Conference …	ieeexplore.ieee.org	https://ieeexplore.ieee.org/abstract/document/8793490/	https://ieeexplore.ieee.org/abstract/document/8793490/
2	W Xiong, J Du, WY Wang, V Stoyanov	Pretrained Encyclopedia: Weakly Supervised Knowledge-Pretrained Language Model	2019	arXiv preprint arXiv:1912.09637	arxiv.org	https://arxiv.org/abs/1912.09637	https://arxiv.org/abs/1912.09637
2	A Laddha	Road detection and semantic segmentation without strong human supervision	2016	Robotics Institute Carnegie Mellon University …	pdfs.semanticscholar.org	https://pdfs.semanticscholar.org/53be/d46ade7d09af5301a730ac147d3d25329f4e.pdf	https://pdfs.semanticscholar.org/53be/d46ade7d09af5301a730ac147d3d25329f4e.pdf
2	A Etzioni, O Etzioni, AI Operational	The magazine archive includes every article published in Communications of the ACM for over the past 50 years.	2016	Communications of the ACM	cacm.acm.org	https://cacm.acm.org/magazines/2008/12/3344-open-information-extraction-from-the-web/fulltext	https://cacm.acm.org/magazines/2008/12/3344-open-information-extraction-from-the-web/fulltext
2	S Homoceanu, WT Balke	Querying concepts in product data by means of query expansion	2014	Web Intelligence and Agent …	content.iospress.com	https://content.iospress.com/articles/web-intelligence-and-agent-systems-an-international-journal/wia282	https://content.iospress.com/articles/web-intelligence-and-agent-systems-an-international-journal/wia282
2	Z Sabetsarvestani, B Sober, C Higgitt…	Artificial intelligence for art investigation: Meeting the challenge of separating x-ray images of the Ghent Altarpiece	2019	Science …	advances.sciencemag.org	https://advances.sciencemag.org/content/5/8/eaaw7416.abstract	https://advances.sciencemag.org/content/5/8/eaaw7416.abstract
2	S Kumari, D Roy, M Cartwright…	EdgeL^ 3: Compressing L^ 3-Net for Mote Scale Urban Noise Monitoring	2019	2019 IEEE …	ieeexplore.ieee.org	https://ieeexplore.ieee.org/abstract/document/8778418/	https://ieeexplore.ieee.org/abstract/document/8778418/
2	E Brosh, M Friedmann, I Kadar…	Accurate visual localization for automotive applications	2019	Proceedings of the …	openaccess.thecvf.com	http://openaccess.thecvf.com/content_CVPRW_2019/html/WAD/Brosh_Accurate_Visual_Localization_for_Automotive_Applications_CVPRW_2019_paper.html	http://openaccess.thecvf.com/content_CVPRW_2019/html/WAD/Brosh_Accurate_Visual_Localization_for_Automotive_Applications_CVPRW_2019_paper.html
2	A Senocak, TH Oh, J Kim, MH Yang…	Learning to Localize Sound Sources in Visual Scenes: Analysis and Applications	2019	arXiv preprint arXiv …	arxiv.org	https://arxiv.org/abs/1911.09649	https://arxiv.org/abs/1911.09649
2	K Hartikainen, X Geng, T Haarnoja, S Levine	Dynamical Distance Learning for Unsupervised and Semi-Supervised Skill Discovery	2019	arXiv preprint arXiv …	arxiv.org	https://arxiv.org/abs/1907.08225	https://arxiv.org/abs/1907.08225
2	J Wang, B Hu, Y Long, Y Guan	Order matters: Shuffling sequence generation for video prediction	2019	arXiv preprint arXiv:1907.08845	arxiv.org	https://arxiv.org/abs/1907.08845	https://arxiv.org/abs/1907.08845
1	L Beyer, X Zhai, A Oliver…	S4L: Self-supervised semi-supervised learning	2019	2019 IEEE/CVF …	ieeexplore.ieee.org	https://ieeexplore.ieee.org/abstract/document/9010283/	https://ieeexplore.ieee.org/abstract/document/9010283/
1	KG Van Hecke	Persistent self-supervised learning principle: Study and demonstration on flying robots	2015		repository.tudelft.nl	https://repository.tudelft.nl/islandora/object/uuid:b722da02-089f-42a8-a3ea-fb3f5900bcdd	https://repository.tudelft.nl/islandora/object/uuid:b722da02-089f-42a8-a3ea-fb3f5900bcdd
1	MLL Rompen, WP Sanberg, G Dubbelman	Online self-supervised learning for road detection	2014	WIC/IEEE Symp. on …	pure.tue.nl	https://pure.tue.nl/ws/files/3981998/774628.pdf#page=158	https://pure.tue.nl/ws/files/3981998/774628.pdf#page=158
1	X Li, S Liu, S De Mello, X Wang, J Kautz…	Joint-task self-supervised learning for temporal correspondence	2019	Advances in Neural …	papers.nips.cc	http://papers.nips.cc/paper/8324-joint-task-self-supervised-learning-for-temporal-correspondence	http://papers.nips.cc/paper/8324-joint-task-self-supervised-learning-for-temporal-correspondence
1	J Gildenblat, E Klaiman	Self-supervised similarity learning for digital pathology	2019	arXiv preprint arXiv:1905.08139	arxiv.org	https://arxiv.org/abs/1905.08139	https://arxiv.org/abs/1905.08139
1	A Narayanan, YT Chen, S Malla	Semi-supervised Learning: Fusion of Self-supervised, Supervised Learning, and Multimodal Cues for Tactical Driver Behavior Detection	2018	arXiv preprint arXiv:1807.00864	arxiv.org	https://arxiv.org/abs/1807.00864	https://arxiv.org/abs/1807.00864
1	X Liu, A Sinha, M Ishii, GD Hager, A Reiter…	Self-supervised learning for dense depth estimation in monocular endoscopy	2019	arXiv preprint arXiv …	arxiv.org	https://arxiv.org/abs/1902.07766	https://arxiv.org/abs/1902.07766
1	Y Liu, Q Wu, L Tang, L Xu	Self-supervised learning of video representation for anticipating actions in early stage	2018	IEICE TRANSACTIONS on Information …	search.ieice.org	https://search.ieice.org/bin/summary.php?id=e101-d_5_1449	https://search.ieice.org/bin/summary.php?id=e101-d_5_1449
1	R Gomez, L Gomez, J Gibert, D Karatzas	Self-Supervised Learning from Web Data for Multimodal Retrieval	2019	Multimodal Scene …	Elsevier	https://www.sciencedirect.com/science/article/pii/B9780128173589000159	https://www.sciencedirect.com/science/article/pii/B9780128173589000159
1	G Wu, X Zhu, S Gong	Tracklet self-supervised learning for unsupervised person re-identification	2020	AAAI Conference on Artificial Intelligence	eecs.qmul.ac.uk	http://www.eecs.qmul.ac.uk/~sgg/papers/WuEtAl_AAAI2020.pdf	http://www.eecs.qmul.ac.uk/~sgg/papers/WuEtAl_AAAI2020.pdf
1	GD Hager, RH Taylor, A Reiter	Self-supervised learning for dense depth estimation in monocular endoscopy	2018	OR 2.0 Context-Aware Operating …	books.google.com	https://books.google.com/books?hl=en&lr=&id=KwlxDwAAQBAJ&oi=fnd&pg=PA128&dq=%22self-supervised+learning%22&ots=WDHIayWCmT&sig=FmlF4x8os7QHo5tc5b9lNbNuXeM	https://books.google.com/books?hl=en&lr=&id=KwlxDwAAQBAJ&oi=fnd&pg=PA128&dq=%22self-supervised+learning%22&ots=WDHIayWCmT&sig=FmlF4x8os7QHo5tc5b9lNbNuXeM
1	A Taleb, C Lippert, T Klein, M Nabi	Multimodal Self-Supervised Learning for Medical Image Analysis	2019	arXiv preprint arXiv:1912.05396	arxiv.org	https://arxiv.org/abs/1912.05396	https://arxiv.org/abs/1912.05396
1	S Venkattaramanujam, E Crawford, T Doan…	Self-supervised Learning of Distance Functions for Goal-Conditioned Reinforcement Learning	2019	arXiv preprint arXiv …	arxiv.org	https://arxiv.org/abs/1907.02998	https://arxiv.org/abs/1907.02998
1	S Mohseni, M Pitale, JBS Yadawa, Z Wang	Self-Supervised Learning for Generalizable Out-of-Distribution Detection	2020		people.tamu.edu	http://people.tamu.edu/~sina.mohseni/papers/Self_Supervised_Learning_for_Generalizable_Out_of_Distribution_Detection.pdf	http://people.tamu.edu/~sina.mohseni/papers/Self_Supervised_Learning_for_Generalizable_Out_of_Distribution_Detection.pdf
1	MA Aragon-Calvo	Self-supervised Learning with Physics-aware Neural Networks I: Galaxy Model Fitting	2019	arXiv preprint arXiv:1907.03957	arxiv.org	https://arxiv.org/abs/1907.03957	https://arxiv.org/abs/1907.03957
1	J Cho, Y Kim, H Jung, C Oh, J Youn…	Multi-Task Self-Supervised Visual Representation Learning for Monocular Road Segmentation	2018	2018 IEEE International …	ieeexplore.ieee.org	https://ieeexplore.ieee.org/abstract/document/8486472/	https://ieeexplore.ieee.org/abstract/document/8486472/
1	K Suzuki, Y Yokota, Y Kanazawa…	Online Self-Supervised Learning for Object Picking: Detecting Optimum Grasping Position using a Metric Learning Approach	2020	2020 IEEE/SICE …	ieeexplore.ieee.org	https://ieeexplore.ieee.org/abstract/document/9025845/	https://ieeexplore.ieee.org/abstract/document/9025845/
1	X Dai, S Li, F Sun	Adaptive terrain classification in field environment based on self-supervised learning	2014	Proceedings of 2014 IEEE Chinese …	ieeexplore.ieee.org	https://ieeexplore.ieee.org/abstract/document/7007211/	https://ieeexplore.ieee.org/abstract/document/7007211/
1	K van Hecke, GCHE de Croon, D Hennesb…	Self-supervised learning as an enabling technology for future space exploration robots: ISS experiments	2016		esa.int	https://www.esa.int/gsp/ACT/doc/AI/pub/ACT-RPR-AI-2016-IAF-selfsupervisedlearningontheISS.pdf	https://www.esa.int/gsp/ACT/doc/AI/pub/ACT-RPR-AI-2016-IAF-selfsupervisedlearningontheISS.pdf
1	G de Croon	Self-supervised learning: When is fusion of the primary and secondary sensor cue useful?	2017	arXiv preprint arXiv:1709.08126	arxiv.org	https://arxiv.org/abs/1709.08126	https://arxiv.org/abs/1709.08126
1	C Wang, Y Yuan, Q Wang	Learning by inertia: Self-supervised monocular visual odometry for road vehicles	2019	ICASSP 2019-2019 IEEE …	ieeexplore.ieee.org	https://ieeexplore.ieee.org/abstract/document/8683446/	https://ieeexplore.ieee.org/abstract/document/8683446/
1	J Mayr, C Unger, F Tombari	Self-supervised learning of the drivable area for autonomous vehicles	2018	2018 IEEE/RSJ International …	ieeexplore.ieee.org	https://ieeexplore.ieee.org/abstract/document/8594480/	https://ieeexplore.ieee.org/abstract/document/8594480/
1	P Čížek, J Faigl	Self-supervised learning of the biologically-inspired obstacle avoidance of hexapod walking robot	2019	Bioinspiration & biomimetics	iopscience.iop.org	https://iopscience.iop.org/article/10.1088/1748-3190/ab1a9c/meta	https://iopscience.iop.org/article/10.1088/1748-3190/ab1a9c/meta
1	V Guizilini, F Ramos	Online self-supervised learning for dynamic object segmentation	2015	The International Journal of Robotics …	journals.sagepub.com	https://journals.sagepub.com/doi/abs/10.1177/0278364914566514	https://journals.sagepub.com/doi/abs/10.1177/0278364914566514
1	X Deng, Y Xiang, A Mousavian, C Eppner…	Self-supervised 6d object pose estimation for robot manipulation	2019	arXiv preprint arXiv …	arxiv.org	https://arxiv.org/abs/1909.10159	https://arxiv.org/abs/1909.10159
1	R Ambrus, V Guizilini, J Li, S Pillai, A Gaidon	Two stream networks for self-supervised ego-motion estimation	2019	arXiv preprint arXiv …	arxiv.org	https://arxiv.org/abs/1910.01764	https://arxiv.org/abs/1910.01764
1	H Tang, Y Zhao, H Lu	Unsupervised Person Re-Identification With Iterative Self-Supervised Domain Adaptation	2019	Proceedings of the IEEE …	openaccess.thecvf.com	http://openaccess.thecvf.com/content_CVPRW_2019/html/TRMTMCT/Tang_Unsupervised_Person_Re-Identification_With_Iterative_Self-Supervised_Domain_Adaptation_CVPRW_2019_paper.html	http://openaccess.thecvf.com/content_CVPRW_2019/html/TRMTMCT/Tang_Unsupervised_Person_Re-Identification_With_Iterative_Self-Supervised_Domain_Adaptation_CVPRW_2019_paper.html
1	H Mittal, B Okorn, D Held	Just go with the flow: Self-supervised scene flow estimation	2019	arXiv preprint arXiv:1912.00497	arxiv.org	https://arxiv.org/abs/1912.00497	https://arxiv.org/abs/1912.00497
1	YD Lu, HY Lee, HY Tseng…	Self-supervised audio spatialization with correspondence classifier	2019	2019 IEEE International …	ieeexplore.ieee.org	https://ieeexplore.ieee.org/abstract/document/8803494/	https://ieeexplore.ieee.org/abstract/document/8803494/
1	T Lee, T Gong, S Padhy, A Rouditchenko…	Label-efficient audio classification through multitask learning and self-supervision	2019	arXiv preprint arXiv …	arxiv.org	https://arxiv.org/abs/1910.12587	https://arxiv.org/abs/1910.12587
1	S Daftry, Y Agrawal, L Matthies	Online self-supervised scene segmentation for micro aerial vehicles	2018	arXiv preprint arXiv:1806.05269	arxiv.org	https://arxiv.org/abs/1806.05269	https://arxiv.org/abs/1806.05269
1	B Lee, DD Lee	Self-supervised online learning of appearance for 3D tracking	2017	2017 IEEE/RSJ International Conference on …	ieeexplore.ieee.org	https://ieeexplore.ieee.org/abstract/document/8206373/	https://ieeexplore.ieee.org/abstract/document/8206373/
1	C Yi, D Song, J Cho	Self-supervised sensor learning and its application: Building 3d semantic maps using terrain classification	2014	International Journal of Distributed …	journals.sagepub.com	https://journals.sagepub.com/doi/abs/10.1155/2014/394942	https://journals.sagepub.com/doi/abs/10.1155/2014/394942
1	T Asabuki, T Fukai	Artificial Dendritic Neurons Enable Self-Supervised Temporal Feature Extraction	2019	bioRxiv	biorxiv.org	https://www.biorxiv.org/content/10.1101/517888v1.abstract	https://www.biorxiv.org/content/10.1101/517888v1.abstract
1	DM Dwyer	Considering the Challenge of Mackintosh 2009:(Un) self-supervised Perceptual Learning?	2016	col· lecció homenatges	researchgate.net	https://www.researchgate.net/profile/Victoria_Chamizo/publication/315458816_Associative_Learning_and_Cognition_Homage_to_Professor_N_J_Mackintosh_In_Memoriam_1935-2015/links/58d0eeeb4585158476f35a8b/Associative-Learning-and-Cognition-Homage-to-Professor-N-J-Mackintosh-In-Memoriam-1935-2015.pdf#page=69	#VALUE!
1	CC Rocha, N Padoy, B Rosa	Self-supervised surgical tool segmentation using kinematic information	2019	arXiv preprint arXiv:1902.04810	arxiv.org	https://arxiv.org/abs/1902.04810	https://arxiv.org/abs/1902.04810
1	KS Peng, D Gregory…	Self-Supervised Correlational Monocular Depth Estimation using ResVGG Network	2019	7th IIAE International …	pdfs.semanticscholar.org	https://pdfs.semanticscholar.org/4940/dbf5d2b484e4afa75217ffdc69f73d996b05.pdf	https://pdfs.semanticscholar.org/4940/dbf5d2b484e4afa75217ffdc69f73d996b05.pdf
1	G Larsson	Discovery of visual semantics by unsupervised and self-supervised representation learning	2017	arXiv preprint arXiv:1708.05812	arxiv.org	https://arxiv.org/abs/1708.05812	https://arxiv.org/abs/1708.05812
1	M Poggi, F Aleotti, F Tosi…	On the uncertainty of self-supervised monocular depth estimation	2020	The IEEE Conference on …	labvisione.deis.unibo.it	http://labvisione.deis.unibo.it/~mpoggi/papers/poggi2020cvpr.pdf	http://labvisione.deis.unibo.it/~mpoggi/papers/poggi2020cvpr.pdf
1	P Sarkar, A Etemad	Self-supervised Learning for ECG-based Emotion Recognition	2019	arXiv preprint arXiv:1910.07497	arxiv.org	https://arxiv.org/abs/1910.07497	https://arxiv.org/abs/1910.07497
1	C Liu, L Song, J Zhang, K Chen…	Self-supervised learning for specified latent representation	2019	IEEE Transactions on …	ieeexplore.ieee.org	https://ieeexplore.ieee.org/abstract/document/8664135/	https://ieeexplore.ieee.org/abstract/document/8664135/
1	J Paquim	Learning Depth from Single Monocular Images Using Stereo Supervisory Input	2016		repository.tudelft.nl	https://repository.tudelft.nl/islandora/object/uuid:4b4c4e4b-5e45-4166-bd2c-f35a1e495c6a	https://repository.tudelft.nl/islandora/object/uuid:4b4c4e4b-5e45-4166-bd2c-f35a1e495c6a
1	H Wang, X Wang, W Xiong, M Yu, X Guo…	Self-Supervised Learning for Contextualized Extractive Summarization	2019	arXiv preprint arXiv …	arxiv.org	https://arxiv.org/abs/1906.04466	https://arxiv.org/abs/1906.04466
1	H Alwassel, D Mahajan, L Torresani, B Ghanem…	Self-Supervised Learning by Cross-Modal Audio-Video Clustering	2019	arXiv preprint arXiv …	arxiv.org	https://arxiv.org/abs/1911.12667	https://arxiv.org/abs/1911.12667
1	A Rivail, U Schmidt-Erfurth, WD Vogel…	Modeling Disease Progression in Retinal OCTs with Longitudinal Self-supervised Learning	2019	… Workshop on PRedictive …	Springer	https://link.springer.com/chapter/10.1007/978-3-030-32281-6_5	https://link.springer.com/chapter/10.1007/978-3-030-32281-6_5
1	A El-Nouby, S Zhai, GW Taylor, JM Susskind	Skip-Clip: Self-Supervised Spatiotemporal Representation Learning by Future Clip Order Ranking	2019	arXiv preprint arXiv …	arxiv.org	https://arxiv.org/abs/1910.12770	https://arxiv.org/abs/1910.12770
1	T Shen, L Zhou, Z Luo, Y Yao, S Li…	Self-Supervised Learning of Depth and Motion Under Photometric Inconsistency	2019	Proceedings of the …	openaccess.thecvf.com	http://openaccess.thecvf.com/content_ICCVW_2019/html/GMDL/Shen_Self-Supervised_Learning_of_Depth_and_Motion_Under_Photometric_Inconsistency_ICCVW_2019_paper.html	http://openaccess.thecvf.com/content_ICCVW_2019/html/GMDL/Shen_Self-Supervised_Learning_of_Depth_and_Motion_Under_Photometric_Inconsistency_ICCVW_2019_paper.html
1	S Wirges, J Gräter, Q Zhang…	Self-supervised flow estimation using geometric regularization with applications to camera image and grid map sequences	2019	2019 IEEE Intelligent …	ieeexplore.ieee.org	https://ieeexplore.ieee.org/abstract/document/8916989/	https://ieeexplore.ieee.org/abstract/document/8916989/
1	GS Hartnett, M Mohseni	Self-Supervised Learning of Generative Spin-Glasses with Normalizing Flows	2020	arXiv preprint arXiv:2001.00585	arxiv.org	https://arxiv.org/abs/2001.00585	https://arxiv.org/abs/2001.00585
1	E Amrani, R Ben-Ari, T Hakim…	Learning to Detect and Retrieve Objects From Unlabeled Videos	2019	2019 IEEE/CVF …	ieeexplore.ieee.org	https://ieeexplore.ieee.org/abstract/document/9022341/	https://ieeexplore.ieee.org/abstract/document/9022341/
1	Y Endo, Y Kanamori, S Kuriyama	Animating landscape: self-supervised learning of decoupled motion and appearance for single-image video synthesis	2019	arXiv preprint arXiv:1910.07192	arxiv.org	https://arxiv.org/abs/1910.07192	https://arxiv.org/abs/1910.07192
1	S Nair, C Finn	Hierarchical Foresight: Self-Supervised Learning of Long-Horizon Tasks via Visual Subgoal Generation	2019	arXiv preprint arXiv:1909.05829	arxiv.org	https://arxiv.org/abs/1909.05829	https://arxiv.org/abs/1909.05829
1	L Chum, A Subramanian, VN Balasubramanian…	Beyond Supervised Learning: A Computer Vision Perspective	2019	Journal of the Indian …	Springer	https://link.springer.com/article/10.1007/s41745-019-0099-3	https://link.springer.com/article/10.1007/s41745-019-0099-3
1	X Li, D Fourches	Inductive Transfer Learning for Molecular Activity Prediction: Next-Gen QSAR Models with MolPMoFiT	2020		chemrxiv.org	https://chemrxiv.org/articles/Inductive_Transfer_Learning_for_Molecular_Activity_Prediction_Next-Gen_QSAR_Models_with_MolPMoFiT/9978743	https://chemrxiv.org/articles/Inductive_Transfer_Learning_for_Molecular_Activity_Prediction_Next-Gen_QSAR_Models_with_MolPMoFiT/9978743
1	G de Croon, C De Wagter	Learning what is above and what is below: horizon approach to monocular obstacle detection	2018	arXiv preprint arXiv:1806.08007	arxiv.org	https://arxiv.org/abs/1806.08007	https://arxiv.org/abs/1806.08007
1	BC Song, DH Kim, S hyun Lee	Metric-based regularization and temporal ensemble for multi-task learning using heterogeneous unsupervised tasks	2019	2019 IEEE/CVF International …	ieeexplore.ieee.org	https://ieeexplore.ieee.org/abstract/document/9022628/	https://ieeexplore.ieee.org/abstract/document/9022628/
1	A Gupta	Supersizing self-supervision: Learning perception and action without human supervision	2016		smartech.gatech.edu	https://smartech.gatech.edu/handle/1853/56073	https://smartech.gatech.edu/handle/1853/56073
1	YM Asano, C Rupprecht, A Vedaldi	A critical analysis of self-supervision, or what we can learn from a single image	2019	arXiv preprint arXiv …	researchgate.net	https://www.researchgate.net/profile/Christian_Rupprecht/publication/332779016_Surprising_Effectiveness_of_Few-Image_Unsupervised_Feature_Learning/links/5e1615234585159aa4be6966/Surprising-Effectiveness-of-Few-Image-Unsupervised-Feature-Learning.pdf	https://www.researchgate.net/profile/Christian_Rupprecht/publication/332779016_Surprising_Effectiveness_of_Few-Image_Unsupervised_Feature_Learning/links/5e1615234585159aa4be6966/Surprising-Effectiveness-of-Few-Image-Unsupervised-Feature-Learning.pdf
1	D Luo, C Liu, Y Zhou, D Yang, C Ma, Q Ye…	Video Cloze Procedure for Self-Supervised Spatio-Temporal Learning	2020	arXiv preprint arXiv …	arxiv.org	https://arxiv.org/abs/2001.00294	https://arxiv.org/abs/2001.00294
1	A Mahendran, J Thewlis…	Self-Supervised Segmentation by Grouping Optical-Flow	2018	Proceedings of the …	openaccess.thecvf.com	http://openaccess.thecvf.com/content_eccv_2018_workshops/w28/html/Mahendran_Self-Supervised_Segmentation_by_Grouping_Optical-Flow_ECCVW_2018_paper.html	http://openaccess.thecvf.com/content_eccv_2018_workshops/w28/html/Mahendran_Self-Supervised_Segmentation_by_Grouping_Optical-Flow_ECCVW_2018_paper.html
1	Y Patel, L Gomez, M Rusiñol, D Karatzas…	Self-Supervised Visual Representations for Cross-Modal Retrieval	2019	Proceedings of the …	dl.acm.org	https://dl.acm.org/doi/abs/10.1145/3323873.3325035	https://dl.acm.org/doi/abs/10.1145/3323873.3325035
1	X Wang, D Kihara, J Luo, GJ Qi	EnAET: Self-Trained Ensemble AutoEncoding Transformations for Semi-Supervised Learning	2019	arXiv preprint arXiv:1911.09265	arxiv.org	https://arxiv.org/abs/1911.09265	https://arxiv.org/abs/1911.09265
1	M Zolfaghari, Ö Çiçek, SM Ali, F Mahdisoltani…	Learning representations for predicting future activities	2019	arXiv preprint arXiv …	arxiv.org	https://arxiv.org/abs/1905.03578	https://arxiv.org/abs/1905.03578
1	L Jing, X Yang, J Liu, Y Tian	Self-Supervised Spatiotemporal Feature Learning via Video Rotation Prediction	2018	arXiv preprint arXiv:1811.11387	arxiv.org	https://arxiv.org/abs/1811.11387	https://arxiv.org/abs/1811.11387
1	C Oh, A Cavallaro	Learning Action Representations for Self-supervised Visual Exploration	2019	2019 International Conference on Robotics …	ieeexplore.ieee.org	https://ieeexplore.ieee.org/abstract/document/8794401/	https://ieeexplore.ieee.org/abstract/document/8794401/
1	Y Yuan, J Sun, J Guan	Blind SAR Image Despeckling Using Self-Supervised Dense Dilated Convolutional Neural Network	2019	arXiv preprint arXiv:1908.01608	arxiv.org	https://arxiv.org/abs/1908.01608	https://arxiv.org/abs/1908.01608
1	Y Almalioglu, M Turan, AE Sari, MRU Saputra…	SelfVIO: Self-Supervised Deep Monocular Visual-Inertial Odometry and Depth Estimation	2019	arXiv preprint arXiv …	arxiv.org	https://arxiv.org/abs/1911.09968	https://arxiv.org/abs/1911.09968
1	AJ Piergiovanni, A Angelova, MS Ryoo	Evolving Losses for Unlabeled Video Representation Learning	2019	arXiv preprint arXiv:1906.03248	arxiv.org	https://arxiv.org/abs/1906.03248	https://arxiv.org/abs/1906.03248
1	J Zhang, M Sun, J Chen, H Tang, Y Yan, X Qin…	GazeCorrection: Self-Guided Eye Manipulation in the wild using Self-Supervised Generative Adversarial Networks	2019	arXiv preprint arXiv …	arxiv.org	https://arxiv.org/abs/1906.00805	https://arxiv.org/abs/1906.00805
1	NT Tran, VH Tran, BN Nguyen, L Yang	Self-supervised GAN: Analysis and Improvement with Multi-class Minimax Game	2019	Advances in Neural …	papers.nips.cc	http://papers.nips.cc/paper/9481-self-supervised-gan-analysis-and-improvement-with-multi-class-minimax-game	http://papers.nips.cc/paper/9481-self-supervised-gan-analysis-and-improvement-with-multi-class-minimax-game
1	Y Guo, J Zhang, L Cai, J Cai, J Zheng	Self-supervised CNN for Unconstrained 3D Facial Performance Capture from an RGB-D Camera	2018	arXiv preprint arXiv:1808.05323	arxiv.org	https://arxiv.org/abs/1808.05323	https://arxiv.org/abs/1808.05323
1	N Zioulis, A Karakottas, D Zarpalas…	Spherical View Synthesis for Self-Supervised 360° Depth Estimation	2019	… Conference on 3D …	ieeexplore.ieee.org	https://ieeexplore.ieee.org/abstract/document/8885706/	https://ieeexplore.ieee.org/abstract/document/8885706/
1	R Jeong, Y Aytar, D Khosid, Y Zhou, J Kay…	Self-Supervised Sim-to-Real Adaptation for Visual Robotic Manipulation	2019	arXiv preprint arXiv …	arxiv.org	https://arxiv.org/abs/1910.09470	https://arxiv.org/abs/1910.09470
1	B Ma, S Liu, Y Zhi, Q Song	Flow Based Self-supervised Pixel Embedding for Image Segmentation	2019	arXiv preprint arXiv:1901.00520	arxiv.org	https://arxiv.org/abs/1901.00520	https://arxiv.org/abs/1901.00520
1	Z Zheng, C Yuan, X Zhu, Z Lin, Y Cheng…	Self-Supervised Mixture-of-Experts by Uncertainty Estimation	2019	Proceedings of the …	wvvw.aaai.org	https://wvvw.aaai.org/ojs/index.php/AAAI/article/view/4544	https://wvvw.aaai.org/ojs/index.php/AAAI/article/view/4544
1	B Jia, J Brandt, R Mech, B Kim, D Manocha	LPaintB: Learning to Paint from Self-Supervision	2019		pdfs.semanticscholar.org	https://pdfs.semanticscholar.org/083d/edf447ea41f808ff372130669c4b9ebf202a.pdf	https://pdfs.semanticscholar.org/083d/edf447ea41f808ff372130669c4b9ebf202a.pdf
1	AP Brna, RC Brown, PM Connolly, SB Simons…	Uncertainty-based modulation for lifelong learning	2019	Neural Networks	Elsevier	https://www.sciencedirect.com/science/article/pii/S0893608019302722	https://www.sciencedirect.com/science/article/pii/S0893608019302722
1	A Valada, W Burgard	Learning reliable and scalable representations using multimodal multitask deep learning	2018	In Proceedings of RSS Pioneers …	ais.informatik.uni-freiburg.de	http://ais.informatik.uni-freiburg.de/publications/papers/valada18rsspi.pdf	http://ais.informatik.uni-freiburg.de/publications/papers/valada18rsspi.pdf
1	J Xu, S Zhu, H Guo, S Wu	Automated Labeling for Robotic Autonomous Navigation Through Multi-Sensory Semi-Supervised Learning on Big Data	2019	IEEE Transactions on Big Data	ieeexplore.ieee.org	https://ieeexplore.ieee.org/abstract/document/8611138/	https://ieeexplore.ieee.org/abstract/document/8611138/
1	J Hohwy	Self-supervision, normativity and the free energy principle	2020	Synthese	Springer	https://link.springer.com/article/10.1007/s11229-020-02622-2	https://link.springer.com/article/10.1007/s11229-020-02622-2
1	H Lee, SJ Hwang, J Shin	Rethinking Data Augmentation: Self-Supervision and Self-Distillation	2019	arXiv preprint arXiv:1910.05872	arxiv.org	https://arxiv.org/abs/1910.05872	https://arxiv.org/abs/1910.05872
1	M Chen, KW Chang, D Roth	Recent advances in transferable representation learning	2020	AAAI Tutorials	muhaochen.github.io	https://muhaochen.github.io/index_files/AAAI_2020_TRL.pdf	https://muhaochen.github.io/index_files/AAAI_2020_TRL.pdf
1	G Zhu, J Wang, Z Ren, C Zhang	Object-oriented dynamics learning through multi-level abstraction	2019	arXiv preprint arXiv:1904.07482	arxiv.org	https://arxiv.org/abs/1904.07482	https://arxiv.org/abs/1904.07482
1	J Wei	A Functionally Separate Autoencoder	2020		techrxiv.org	https://www.techrxiv.org/articles/A_Functionally_Separate_Autoencoder/12045534/1	https://www.techrxiv.org/articles/A_Functionally_Separate_Autoencoder/12045534/1
1	W Hao, C Li, X Li, L Carin, J Gao	Towards Learning a Generic Agent for Vision-and-Language Navigation via Pre-training	2020	arXiv preprint arXiv:2002.10638	arxiv.org	https://arxiv.org/abs/2002.10638	https://arxiv.org/abs/2002.10638
1	J Chen, S Chen, Y Qi, S Fu	Intelligent massive MIMO antenna selection using Monte Carlo tree search	2019	IEEE Transactions on Signal …	ieeexplore.ieee.org	https://ieeexplore.ieee.org/abstract/document/8831394/	https://ieeexplore.ieee.org/abstract/document/8831394/
1	J Hu, R Ji, SC Zhang, X Sun, Q Ye, CW Lin…	Information Competing Process for Learning Diversified Representations	2019	Advances in Neural …	papers.nips.cc	http://papers.nips.cc/paper/8490-information-competing-process-for-learning-diversified-representations	http://papers.nips.cc/paper/8490-information-competing-process-for-learning-diversified-representations
1	YM Asano, C Rupprecht, A Vedaldi	Self-labelling via simultaneous clustering and representation learning	2019	arXiv preprint arXiv:1911.05371	arxiv.org	https://arxiv.org/abs/1911.05371	https://arxiv.org/abs/1911.05371
1	M Caron	Unsupervised representation learning with clustering in deep convolutional networks	2018		diva-portal.org	http://www.diva-portal.org/smash/record.jsf?pid=diva2:1205540	http://www.diva-portal.org/smash/record.jsf?pid=diva2:1205540
1	J Wang, W Zhou, GJ Qi, Z Fu, Q Tian…	Transformation gan for unsupervised image synthesis and representation learning	2020	Proceedings of the IEEE …	eecs.ucf.edu	http://www.eecs.ucf.edu/~gqi/publications/CVPR2020_TrGAN.pdf	http://www.eecs.ucf.edu/~gqi/publications/CVPR2020_TrGAN.pdf
1	Y Qian, A Baucom, D Lee	Perception and Strategy Learning in Robot Soccer	2016	The 11th Workshop on …	pdfs.semanticscholar.org	https://pdfs.semanticscholar.org/9a25/e62e5638be7dfd4b1891c87c67f8ac8c791e.pdf	https://pdfs.semanticscholar.org/9a25/e62e5638be7dfd4b1891c87c67f8ac8c791e.pdf
1	L Xu, X Zhang, Q Dong	CLUECorpus2020: A Large-scale Chinese Corpus for Pre-trainingLanguage Model	2020	arXiv preprint arXiv:2003.01355	arxiv.org	https://arxiv.org/abs/2003.01355	https://arxiv.org/abs/2003.01355
1	L Armona, JP González-Brenes, R Edezhath	Beyond Word Embeddings: Dense Representations for Multi-Modal Data	2019	The Thirty-Second …	aaai.org	https://www.aaai.org/ocs/index.php/FLAIRS/FLAIRS19/paper/viewPaper/18294	https://www.aaai.org/ocs/index.php/FLAIRS/FLAIRS19/paper/viewPaper/18294
1	A Miech, JB Alayrac, L Smaira, I Laptev, J Sivic…	End-to-End Learning of Visual Representations from Uncurated Instructional Videos	2019	arXiv preprint arXiv …	arxiv.org	https://arxiv.org/abs/1912.06430	https://arxiv.org/abs/1912.06430
1	SOA Chishti, S Riaz, M BilalZaib…	Self-Driving Cars Using CNN and Q-Learning	2018	2018 IEEE 21st …	ieeexplore.ieee.org	https://ieeexplore.ieee.org/abstract/document/8595684/	https://ieeexplore.ieee.org/abstract/document/8595684/
1	V Tran, Y Wang, M Hoai	Back to the future: Knowledge distillation for human action anticipation	2019	arXiv preprint arXiv:1904.04868	arxiv.org	https://arxiv.org/abs/1904.04868	https://arxiv.org/abs/1904.04868
1	P de Tournemire, D Nitti, E Perot, D Migliore, A Sironi	A large scale event-based detection dataset for automotive	2020	arXiv	ui.adsabs.harvard.edu	https://ui.adsabs.harvard.edu/abs/2020arXiv200108499D/abstract	https://ui.adsabs.harvard.edu/abs/2020arXiv200108499D/abstract
1	S Tang, VR de Sa	Improving sentence representations with multi-view frameworks	2018		openreview.net	https://openreview.net/forum?id=S1xzyhR9Y7	https://openreview.net/forum?id=S1xzyhR9Y7
1	L Tang, K Chen, C Wu, Y Hong, K Jia…	Improving Semantic Analysis on Point Clouds via Auxiliary Supervision of Local Geometric Priors	2020	arXiv preprint arXiv …	arxiv.org	https://arxiv.org/abs/2001.04803	https://arxiv.org/abs/2001.04803
1	N İmamoğlu, G Ding, Y Fang…	Salient object detection on hyperspectral images using features learned from unsupervised segmentation task	2019	ICASSP 2019-2019 …	ieeexplore.ieee.org	https://ieeexplore.ieee.org/abstract/document/8682522/	https://ieeexplore.ieee.org/abstract/document/8682522/
1	HU Banuqitah, F Eassa, K Jambi…	Big Data Knowledge Mining	2016	… Journal of Advanced …	pdfs.semanticscholar.org	https://pdfs.semanticscholar.org/63f4/80504c55947c961c94d36eae318fe7a51f0c.pdf	https://pdfs.semanticscholar.org/63f4/80504c55947c961c94d36eae318fe7a51f0c.pdf
1	S Gurumurthy, S Kumar, K Sycara	MAME: Model-Agnostic Meta-Exploration	2019	arXiv preprint arXiv:1911.04024	arxiv.org	https://arxiv.org/abs/1911.04024	https://arxiv.org/abs/1911.04024
1	H Amiri	Neural Self-Training through Spaced Repetition	2019	Proceedings of the 2019 Conference of the North …	aclweb.org	https://www.aclweb.org/anthology/N19-1003.pdf	https://www.aclweb.org/anthology/N19-1003.pdf
1	D Konar, UK Chakraborty…	A quantum parallel bi-directional self-organizing neural network (QPBDSONN) architecture for extraction of pure color objects from noisy background	2016	… on Advances in …	ieeexplore.ieee.org	https://ieeexplore.ieee.org/abstract/document/7732330/	https://ieeexplore.ieee.org/abstract/document/7732330/
1	T Milbich, O Ghori, F Diego, B Ommer	Unsupervised Representation Learning by Discovering Reliable Image Relations	2020	Pattern Recognition	Elsevier	https://www.sciencedirect.com/science/article/pii/S003132031930408X	https://www.sciencedirect.com/science/article/pii/S003132031930408X
1	R Imamura, T Itasaka, M Okuda	Zero-Shot Hyperspectral Image Denoising With Separable Image Prior	2019	Proceedings of the IEEE …	openaccess.thecvf.com	http://openaccess.thecvf.com/content_ICCVW_2019/html/MDALC/Imamura_Zero-Shot_Hyperspectral_Image_Denoising_With_Separable_Image_Prior_ICCVW_2019_paper.html	http://openaccess.thecvf.com/content_ICCVW_2019/html/MDALC/Imamura_Zero-Shot_Hyperspectral_Image_Denoising_With_Separable_Image_Prior_ICCVW_2019_paper.html
1	K Liu, T Kurutach, C Tung, P Abbeel…	Hallucinative Topological Memory for Zero-Shot Visual Planning	2020	arXiv preprint arXiv …	arxiv.org	https://arxiv.org/abs/2002.12336	https://arxiv.org/abs/2002.12336
1	MS Sapre, AJ Kulkarni, SS Shinde	Finite Element Mesh Smoothing Using Cohort Intelligence	2019	… of the 2nd International Conference on …	Springer	https://link.springer.com/chapter/10.1007/978-981-13-1610-4_48	https://link.springer.com/chapter/10.1007/978-981-13-1610-4_48
1	A Zanardi, J Zilly, A Aumiller, A Censi…	Wormhole learning	2019	… on Robotics and …	ieeexplore.ieee.org	https://ieeexplore.ieee.org/abstract/document/8794336/	https://ieeexplore.ieee.org/abstract/document/8794336/
1	L Chen, J Tian, G Li, CH Wu, EK King…	TailorGAN: Making User-Defined Fashion Designs	2020	The IEEE Winter …	openaccess.thecvf.com	http://openaccess.thecvf.com/content_WACV_2020/html/Chen_TailorGAN_Making_User-Defined_Fashion_Designs_WACV_2020_paper.html	http://openaccess.thecvf.com/content_WACV_2020/html/Chen_TailorGAN_Making_User-Defined_Fashion_Designs_WACV_2020_paper.html
1	M Caron, P Bojanowski, J Mairal, A Joulin	Leveraging large-scale uncurated data for unsupervised pre-training of visual features	2019	arXiv preprint arXiv …	arxiv.org	https://arxiv.org/abs/1905.01278	https://arxiv.org/abs/1905.01278
1	J Deng, H Yu, Z Wang, X Wang…	Self-reproducing video frame interpolation	2019	2019 IEEE Conference …	ieeexplore.ieee.org	https://ieeexplore.ieee.org/abstract/document/8695418/	https://ieeexplore.ieee.org/abstract/document/8695418/
1	C Resnick, Z Zhan, J Bruna	Probing the State of the Art: A Critical Look at Visual Representation Evaluation	2019	arXiv preprint arXiv:1912.00215	arxiv.org	https://arxiv.org/abs/1912.00215	https://arxiv.org/abs/1912.00215
1	X Yan, I Misra, A Gupta, D Ghadiyaram…	ClusterFit: Improving Generalization of Visual Representations	2019	arXiv preprint arXiv …	arxiv.org	https://arxiv.org/abs/1912.03330	https://arxiv.org/abs/1912.03330
1	Z Wu, L Davis, L Sigal	Weakly-Supervised Spatial Context Networks	2019	2019 IEEE Winter Conference on …	ieeexplore.ieee.org	https://ieeexplore.ieee.org/abstract/document/8658975/	https://ieeexplore.ieee.org/abstract/document/8658975/
1	R Tachibana, JJ Näppi, T Hironaka…	Electronic cleansing in CT colonography using a generative adversarial network	2019	Medical Imaging 2019 …	spiedigitallibrary.org	https://www.spiedigitallibrary.org/conference-proceedings-of-spie/10954/1095419/Electronic-cleansing-in-CT-colonography-using-a-generative-adversarial-network/10.1117/12.2512466.short	https://www.spiedigitallibrary.org/conference-proceedings-of-spie/10954/1095419/Electronic-cleansing-in-CT-colonography-using-a-generative-adversarial-network/10.1117/12.2512466.short
1	S Nam, GH Choi, Y Hahm, KS Choi	SRDF: extracting lexical knowledge graph for preserving sentence meaning	2016	… of the Open Knowledge Base and …	aclweb.org	https://www.aclweb.org/anthology/W16-4411.pdf	https://www.aclweb.org/anthology/W16-4411.pdf
1	C Carpenter	Analytics Solution Helps Identify Rod-Pump Failure at the Wellhead	2019	Journal of Petroleum Technology	onepetro.org	https://www.onepetro.org/journal-paper/SPE-0519-0063-JPT	https://www.onepetro.org/journal-paper/SPE-0519-0063-JPT
1	G Han, X Zhang, C Li	Semi-supervised DFF: decoupling detection and feature flow for video object detectors	2018	Proceedings of the 26th ACM international …	dl.acm.org	https://dl.acm.org/doi/abs/10.1145/3240508.3240693	https://dl.acm.org/doi/abs/10.1145/3240508.3240693
1	B James, HZ Girgis	MeShClust2: Application of alignment-free identity scores in clustering long DNA sequences	2018	bioRxiv	biorxiv.org	https://www.biorxiv.org/content/10.1101/451278v1.abstract	https://www.biorxiv.org/content/10.1101/451278v1.abstract
1	Y Tao, H Liu, X Deng, Y Chen, H Xiong, Z Fang…	A Robot Self-learning Grasping Control Method Based on Gaussian Process and Bayesian Algorithm	2018	… on Intelligent Welding …	Springer	https://link.springer.com/chapter/10.1007/978-981-10-8330-3_5	https://link.springer.com/chapter/10.1007/978-981-10-8330-3_5
1	H Kaizuka, Y Nagasaki, R Sako	ROI Regularization for Semi-supervised and Supervised Learning	2019	arXiv preprint arXiv:1905.08615	arxiv.org	https://arxiv.org/abs/1905.08615	https://arxiv.org/abs/1905.08615
0	L Goel, R Singh, M Vatsa	Self-supervised and collaborative learning	2019		repository.iiitd.edu.in	https://repository.iiitd.edu.in/xmlui/handle/123456789/767	https://repository.iiitd.edu.in/xmlui/handle/123456789/767
0	Z Pahuja	Self-supervised learning of spatiotemporal features from video colorization	2019		ideals.illinois.edu	https://www.ideals.illinois.edu/handle/2142/105728	https://www.ideals.illinois.edu/handle/2142/105728
0	PV Tran	Semi-Supervised Learning with Self-Supervised Networks	2019	arXiv preprint arXiv:1906.10343	arxiv.org	https://arxiv.org/abs/1906.10343	https://arxiv.org/abs/1906.10343
0	S Jawed, J Grabocka, L Schmidt-Thieme	Self-Supervised Learning for Semi-Supervised Time Series Classification		ismll.uni-hildesheim.de		https://www.ismll.uni-hildesheim.de/pub/pdfs/pakdd_shayan.pdf	https://www.ismll.uni-hildesheim.de/pub/pdfs/pakdd_shayan.pdf
0	V Keshav, F Delattre	Self-supervised visual feature learning with curriculum	2020	arXiv preprint arXiv:2001.05634	arxiv.org	https://arxiv.org/abs/2001.05634	https://arxiv.org/abs/2001.05634
0	S Petersen, W Bai, C Chen, G Tarroni, J Duan…	Self-Supervised Learning for Cardiac MR Image Segmentation by Anatomical Position Prediction	2019	Arxiv	qmro.qmul.ac.uk	https://qmro.qmul.ac.uk/xmlui/handle/123456789/61143	https://qmro.qmul.ac.uk/xmlui/handle/123456789/61143
0	Z SUN, J WANG, T MAO, X WEI	Segmentation of River Based on Self-supervised Learning	2017	Computer and Modernization	en.cnki.com.cn	http://en.cnki.com.cn/Article_en/CJFDTotal-JYXH201710005.htm	http://en.cnki.com.cn/Article_en/CJFDTotal-JYXH201710005.htm
0	H Banville, G Moffat, I Albuquerque…	Self-supervised representation learning from electroencephalography signals	2019	2019 IEEE 29th …	ieeexplore.ieee.org	https://ieeexplore.ieee.org/abstract/document/8918693/	https://ieeexplore.ieee.org/abstract/document/8918693/
0	A Shukla, K Vougioukas, P Ma, S Petridis…	Visually Guided Self Supervised Learning of Speech Representations	2020	arXiv preprint arXiv …	arxiv.org	https://arxiv.org/abs/2001.04316	https://arxiv.org/abs/2001.04316
0	V Ngampruetikorn, W Bialek, D Schwab	Information-bottleneck renormalization group for self-supervised representation learning	2020	Bulletin of the American Physical …	APS	http://meetings.aps.org/Meeting/MAR20/Session/U24.10	http://meetings.aps.org/Meeting/MAR20/Session/U24.10
0	Y Xiao, D Hao, Z Qian, D Terzopoulos	Self-Supervised, Semi-Supervised, Multi-Context Learning for the Combined Classification and Segmentation of Medical Images		aaai.org		https://www.aaai.org/Papers/AAAI/2020GB/SA-ImranAAZ.616.pdf	https://www.aaai.org/Papers/AAAI/2020GB/SA-ImranAAZ.616.pdf
0	D Hendrycks, M Mazeika, S Kadavath, D Song	Improving Model Robustness and Uncertainty Estimates with Self-Supervised Learning	2019		openreview.net	https://openreview.net/forum?id=SJzWAHHxUr	https://openreview.net/forum?id=SJzWAHHxUr
0	X Zhai, A Oliver, A Kolesnikov, L Beyer	SL: Self-Supervised Semi-Supervised Learning	2019	arXiv preprint arXiv:1905.03670	arxiv.org	https://arxiv.org/abs/1905.03670	https://arxiv.org/abs/1905.03670
0	K Yun, J Park, J Cho	Robust Human Pose Estimation for Rotation via Self-Supervised Learning	2020	IEEE Access	ieeexplore.ieee.org	https://ieeexplore.ieee.org/abstract/document/8995541/	https://ieeexplore.ieee.org/abstract/document/8995541/
0	F Çimen	Time-Contrastive Networks: Self-Supervised Learning from Video		pdfs.semanticscholar.org		https://pdfs.semanticscholar.org/487d/b59e71dbf7ffc7942fe360be80756b1a6477.pdf	https://pdfs.semanticscholar.org/487d/b59e71dbf7ffc7942fe360be80756b1a6477.pdf
0	M Tschannen, J Djolonga, M Ritter…	Self-Supervised Learning of Video-Induced Visual Invariances	2019	arXiv preprint arXiv …	arxiv.org	https://arxiv.org/abs/1912.02783	https://arxiv.org/abs/1912.02783
0	A Mahendran	Self-supervised learning using motion and visualizing convolutional neural networks	2018		ora.ox.ac.uk	https://ora.ox.ac.uk/objects/uuid:05ef7004-0bb1-4852-be1f-892daf694430	https://ora.ox.ac.uk/objects/uuid:05ef7004-0bb1-4852-be1f-892daf694430
0	D Chen, Y Chen, Y Li, F Mao, Y He, H Xue	Self-Supervised Learning For Few-Shot Image Classification	2019	arXiv preprint arXiv …	arxiv.org	https://arxiv.org/abs/1911.06045	https://arxiv.org/abs/1911.06045
0	O Wiles, A Sophia Koepke…	Self-supervised learning of class embeddings from video	2019	Proceedings of the …	openaccess.thecvf.com	http://openaccess.thecvf.com/content_ICCVW_2019/html/CEFRL/Wiles_Self-Supervised_Learning_of_Class_Embeddings_from_Video_ICCVW_2019_paper.html	http://openaccess.thecvf.com/content_ICCVW_2019/html/CEFRL/Wiles_Self-Supervised_Learning_of_Class_Embeddings_from_Video_ICCVW_2019_paper.html
0	O Michailovich, M Zibulevsky	Self-supervised Learning of Inverse Problem Solvers in Medical Imaging	2019	… , China, October 13 and 17, 2019 …	books.google.com	https://books.google.com/books?hl=en&lr=&id=ydW1DwAAQBAJ&oi=fnd&pg=PA111&dq=%22self-supervised+learning%22&ots=nfGD-ps27C&sig=6Twnbx_Ny_x4bJXrz50asdV7ZJc	https://books.google.com/books?hl=en&lr=&id=ydW1DwAAQBAJ&oi=fnd&pg=PA111&dq=%22self-supervised+learning%22&ots=nfGD-ps27C&sig=6Twnbx_Ny_x4bJXrz50asdV7ZJc
0	CY Hsu, A Zeitoun, GH Lee, D Katabi, T Jaakkola	SELF-SUPERVISED LEARNING OF APPLIANCE USAGE		people.csail.mit.edu		https://people.csail.mit.edu/tommi/papers/Hsu_etal_ICLR2020.pdf	https://people.csail.mit.edu/tommi/papers/Hsu_etal_ICLR2020.pdf
0	SM Waldstein, S Riedl, C Grechenig…	Modeling Disease Progression in Retinal OCTs with Longitudinal Self-supervised Learning	2019	… in Medicine: Second …	books.google.com	https://books.google.com/books?hl=en&lr=&id=em21DwAAQBAJ&oi=fnd&pg=PA44&dq=%22self-supervised+learning%22&ots=BOMuU6cVge&sig=DgggsaZRUhbOi1vdgjHRCQvxt5Y	https://books.google.com/books?hl=en&lr=&id=em21DwAAQBAJ&oi=fnd&pg=PA44&dq=%22self-supervised+learning%22&ots=BOMuU6cVge&sig=DgggsaZRUhbOi1vdgjHRCQvxt5Y
0	X Zhan, X Pan, Z Liu, D Lin, CC Loy	Self-Supervised Learning via Conditional Motion Propagation Supplementary Materials		zpascal.net		https://zpascal.net/cvpr2019/Zhan_Self-Supervised_Learning_via_CVPR_2019_supplemental.pdf	https://zpascal.net/cvpr2019/Zhan_Self-Supervised_Learning_via_CVPR_2019_supplemental.pdf
0	Y Ding, Y Xu, SX Zhang, Y Cong, L Wang	Self-supervised learning for audio-visual speaker diarization	2020	arXiv preprint arXiv …	arxiv.org	https://arxiv.org/abs/2002.05314	https://arxiv.org/abs/2002.05314
0	S Sen, S Kainkaryam, C Ong…	Interpolation of regularly sampled prestack seismic data with self-supervised learning	2019	SEG Technical Program …	library.seg.org	https://library.seg.org/doi/abs/10.1190/segam2019-3215774.1	https://library.seg.org/doi/abs/10.1190/segam2019-3215774.1
0	I Achituve, H Maron, G Chechik	Self-Supervised Learning for Domain Adaptation on Point-Clouds	2020	arXiv preprint arXiv:2003.12641	arxiv.org	https://arxiv.org/abs/2003.12641	https://arxiv.org/abs/2003.12641
0	C Geng, Z Tan, S Chen	A Multi-view Perspective of Self-supervised Learning	2020	arXiv preprint arXiv:2003.00877	arxiv.org	https://arxiv.org/abs/2003.00877	https://arxiv.org/abs/2003.00877
0	S Speidel, S Bodenstedt	Temporal Coherence-based Self-supervised Learning for Laparoscopic Workflow Analysis	2018	… , ISIC 2018, Held in Conjunction with …	books.google.com	https://books.google.com/books?hl=en&lr=&id=KwlxDwAAQBAJ&oi=fnd&pg=PA85&dq=%22self-supervised+learning%22&ots=WDHIayWCpX&sig=l1QIHUxpwsvxvq-AfImBpLjiBYg	https://books.google.com/books?hl=en&lr=&id=KwlxDwAAQBAJ&oi=fnd&pg=PA85&dq=%22self-supervised+learning%22&ots=WDHIayWCpX&sig=l1QIHUxpwsvxvq-AfImBpLjiBYg
0	AK Vinjimoor	Boosting Self-Supervised Learning via Knowledge Transfer	2018		search.proquest.com	http://search.proquest.com/openview/9febdc7739bbb89f498e8d4aa8be17ba/1?pq-origsite=gscholar&cbl=18750&diss=y	http://search.proquest.com/openview/9febdc7739bbb89f498e8d4aa8be17ba/1?pq-origsite=gscholar&cbl=18750&diss=y
0	H Spitzer, K Amunts, S Harmeling, T Dickscheid	Compact feature representations for human brain cytoarchitecture using self-supervised learning	2018		pdfs.semanticscholar.org	https://pdfs.semanticscholar.org/403d/1297ebd88c55bdce23eabb7fad80068f039e.pdf	https://pdfs.semanticscholar.org/403d/1297ebd88c55bdce23eabb7fad80068f039e.pdf
0	S Zhang, Z Wen, Z Liu, Q Pan	Rotation Awareness Based Self-Supervised Learning for SAR Target Recognition	2019	IGARSS 2019-2019 IEEE …	ieeexplore.ieee.org	https://ieeexplore.ieee.org/abstract/document/8899169/	https://ieeexplore.ieee.org/abstract/document/8899169/
0	P Luc	Self-supervised learning of predictive segmentation models from video	2019		tel.archives-ouvertes.fr	https://tel.archives-ouvertes.fr/tel-02196890/	https://tel.archives-ouvertes.fr/tel-02196890/
0	S Yin, J Liu, H Li	A Self-Supervised Learning Method for Shadow Detection in Remote Sensing Imagery	2018	3D Research	Springer	https://link.springer.com/article/10.1007/s13319-018-0204-9	https://link.springer.com/article/10.1007/s13319-018-0204-9
0	A Anand Deshmukh, A Kumar, L Boyles, D Charles…	Self-Supervised Contextual Bandits in Computer Vision	2020	arXiv	ui.adsabs.harvard.edu	https://ui.adsabs.harvard.edu/abs/2020arXiv200308485A/abstract	https://ui.adsabs.harvard.edu/abs/2020arXiv200308485A/abstract
0	P Sarkar, A Etemad	Self-supervised ECG Representation Learning for Emotion Recognition	2020	arXiv preprint arXiv:2002.03898	arxiv.org	https://arxiv.org/abs/2002.03898	https://arxiv.org/abs/2002.03898
0	F Chiaroni, MC Rahal, N Hueber, F Dufaux	Self-supervised learning for autonomous vehicles perception: A conciliation between analytical and learning methods	2019	arXiv preprint arXiv …	arxiv.org	https://arxiv.org/abs/1910.01636	https://arxiv.org/abs/1910.01636
0	J Novosel, P Viswanath, B Arsenali	Boosting semantic segmentation with multi-task self-supervised learning for autonomous driving applications		ml4ad.github.io		https://ml4ad.github.io/files/papers/Boosting%20semantic%20segmentation%20with%20multi-task%20self-supervised%20learning%20for%20autonomous%20driving%20applications.pdf	https://ml4ad.github.io/files/papers/Boosting%20semantic%20segmentation%20with%20multi-task%20self-supervised%20learning%20for%20autonomous%20driving%20applications.pdf
0	Y Li, X Wang, S Qi, C Huang, ZL Jiang, Q Liao…	Self-supervised learning-based weight adaptive hashing for fast cross-modal retrieval	2019	Signal, Image and Video …	Springer	https://link.springer.com/article/10.1007/s11760-019-01534-0	https://link.springer.com/article/10.1007/s11760-019-01534-0
0	X Zhuang, Y Li, Y Hu, K Ma, Y Yang…	Self-supervised Feature Learning for 3D Medical Images by Playing a Rubik's Cube	2019	… Conference on Medical …	Springer	https://link.springer.com/chapter/10.1007/978-3-030-32251-9_46	https://link.springer.com/chapter/10.1007/978-3-030-32251-9_46
0	H Li, S Yan, Z Yu, D Tao	Attribute-Identity Embedding and Self-supervised Learning for Scalable Person Re-Identification	2019	… on Circuits and Systems for Video …	ieeexplore.ieee.org	https://ieeexplore.ieee.org/abstract/document/8894380/	https://ieeexplore.ieee.org/abstract/document/8894380/
0	V Guizilini, R Hou, J Li, R Ambrus, A Gaidon	Semantically-Guided Representation Learning for Self-Supervised Monocular Depth	2020	arXiv preprint arXiv …	arxiv.org	https://arxiv.org/abs/2002.12319	https://arxiv.org/abs/2002.12319
0	H Cho, T Kim, HJ Chang, W Hwang	Self-Supervised Spatio-Temporal Representation Learning Using Variable Playback Speed Prediction	2020	arXiv preprint arXiv:2003.02692	arxiv.org	https://arxiv.org/abs/2003.02692	https://arxiv.org/abs/2003.02692
0	N Joshi, Y Shah	MaSo: Masking and Sorting for Self-supervised Representation Learning for Raw Audio		ys1998.github.io		https://ys1998.github.io/research/maso.pdf	https://ys1998.github.io/research/maso.pdf
0	P Liu, I King, M Lyu, J Xu	Flow2Stereo: Effective Self-Supervised Learning of Optical Flow and Stereo Matching	2020	arXiv preprint arXiv:2004.02138	arxiv.org	https://arxiv.org/abs/2004.02138	https://arxiv.org/abs/2004.02138
0	K Chen, H Zhou, Y Chen, X Mao, Y Li, Y He…	Self-supervised Adversarial Training	2019	arXiv preprint arXiv …	arxiv.org	https://arxiv.org/abs/1911.06470	https://arxiv.org/abs/1911.06470
0	S Yamaguchi, S Kanai, T Shioda, S Takeda	Multiple Pretext-Task for Self-Supervised Learning via Mixing Multiple Image Transformations	2019	arXiv preprint arXiv …	arxiv.org	https://arxiv.org/abs/1912.11603	https://arxiv.org/abs/1912.11603
0	Y Chen, H Lu, J Xiao, H Zhang	Traversable region detection based on near-to-far self-supervised incremental learning	2014	2014 International Conference …	ieeexplore.ieee.org	https://ieeexplore.ieee.org/abstract/document/6997747/	https://ieeexplore.ieee.org/abstract/document/6997747/
0	H Kato, T Harada	Self-supervised Learning of 3D Objects from Natural Images	2019	arXiv preprint arXiv:1911.08850	arxiv.org	https://arxiv.org/abs/1911.08850	https://arxiv.org/abs/1911.08850
0	M Yan, Y Zhu, N Jin, J Bohg	Self-Supervised Learning of State Estimation for Manipulating Deformable Linear Objects	2020	IEEE Robotics and Automation …	ieeexplore.ieee.org	https://ieeexplore.ieee.org/abstract/document/8972568/	https://ieeexplore.ieee.org/abstract/document/8972568/
0	D Kim, S Pathak, A Moro, A Yamashita…	SelfSphNet: Motion Estimation of a Spherical Camera via Self-Supervised Learning	2020	IEEE Access	ieeexplore.ieee.org	https://ieeexplore.ieee.org/abstract/document/9018043/	https://ieeexplore.ieee.org/abstract/document/9018043/
0	D Kim, K Saito, TH Oh, BA Plummer, S Sclaroff…	Cross-domain Self-supervised Learning for Domain Adaptation with Few Source Labels	2020	arXiv preprint arXiv …	arxiv.org	https://arxiv.org/abs/2003.08264	https://arxiv.org/abs/2003.08264
0	Y Chen, F Wu, Z Wang, Y Song…	Self-supervised Learning of Detailed 3D Face Reconstruction	2019	arXiv preprint arXiv …	adsabs.harvard.edu	http://adsabs.harvard.edu/abs/2019arXiv191011791C	http://adsabs.harvard.edu/abs/2019arXiv191011791C
0	CH Ho, B Liu, TY Wu, N Vasconcelos	Exploit Clues from Views: Self-Supervised and Regularized Learning for Multiview Object Recognition	2020	arXiv preprint arXiv:2003.12735	arxiv.org	https://arxiv.org/abs/2003.12735	https://arxiv.org/abs/2003.12735
0	JRF Baleia	Haptic robot-environment interaction for self-supervised learning in ground mobility	2014		run.unl.pt	https://run.unl.pt/handle/10362/12475	https://run.unl.pt/handle/10362/12475
0	Y Shi, J Zhu, Y Fang, K Lien, J Gu	Self-Supervised Learning of Depth and Ego-motion with Differentiable Bundle Adjustment	2019	arXiv preprint arXiv:1909.13163	arxiv.org	https://arxiv.org/abs/1909.13163	https://arxiv.org/abs/1909.13163
0	IT Lee, M Marwah, M Arlitt	Attention-Based Self-Supervised Feature Learning for Security Data	2020	arXiv preprint arXiv:2003.10639	arxiv.org	https://arxiv.org/abs/2003.10639	https://arxiv.org/abs/2003.10639
0	B Yaman, SAH Hosseini, S Moeller, J Ellermann…	Self-Supervised Learning of Physics-Based Reconstruction Neural Networks without Fully-Sampled Reference Data	2019	arXiv preprint arXiv …	arxiv.org	https://arxiv.org/abs/1912.07669	https://arxiv.org/abs/1912.07669
0	B Liu, W Guo, X Lu, M Xu, L Cui	A Method of Analysis on Consumer Behavior Characteristics Based on Self-supervised Learning	2019	CCF Conference on Computer …	Springer	https://link.springer.com/chapter/10.1007/978-981-15-1377-0_47	https://link.springer.com/chapter/10.1007/978-981-15-1377-0_47
0	M Chancán, M Milford	MVP: Unified Motion and Visual Self-Supervised Learning for Large-Scale Robotic Navigation	2020	arXiv preprint arXiv:2003.00667	arxiv.org	https://arxiv.org/abs/2003.00667	https://arxiv.org/abs/2003.00667
0	S Jenni, H Jin, P Favaro	Steering Self-Supervised Feature Learning Beyond Local Pixel Statistics	2020	arXiv preprint arXiv:2004.02331	arxiv.org	https://arxiv.org/abs/2004.02331	https://arxiv.org/abs/2004.02331
0	Y Huang, S Qiu, C Wang, C Li	Learning Representations for High-Dynamic-Range Image Color Transfer in a Self-Supervised Way	2020	IEEE Transactions on …	ieeexplore.ieee.org	https://ieeexplore.ieee.org/abstract/document/9042237/	https://ieeexplore.ieee.org/abstract/document/9042237/
0	G Zheng, Q Zhu	Unsupervised Image Feature Extraction Based on Scattering Transform and Self-supervised Learning with Highly Training Efficiency	2019	Journal of Physics: Conference Series	iopscience.iop.org	https://iopscience.iop.org/article/10.1088/1742-6596/1237/3/032044/meta	https://iopscience.iop.org/article/10.1088/1742-6596/1237/3/032044/meta
0	FE Wang, HN Hu, HT Cheng, JT Lin, ST Yang…	Self-Supervised Learning of Depth and Camera Motion from 360 {\deg} Videos	2018	arXiv preprint arXiv …	arxiv.org	https://arxiv.org/abs/1811.05304	https://arxiv.org/abs/1811.05304
0	K Sun, Z Lin, Z Zhu	Multi-Stage Self-Supervised Learning for Graph Convolutional Networks on Graphs with Few Labeled Nodes		zhouchenlin.github.io		https://zhouchenlin.github.io/Publications/2020-AAAI-M3S.pdf	https://zhouchenlin.github.io/Publications/2020-AAAI-M3S.pdf
0	Y Hu, T Furukawa	A Self-Supervised Learning Technique for Road Defects Detection Based on Monocular Three-Dimensional Reconstruction	2019	… Design Engineering Technical …	asmedigitalcollection.asme.org	https://asmedigitalcollection.asme.org/IDETC-CIE/proceedings-abstract/IDETC-CIE2019/59216/V003T01A021/1069886	https://asmedigitalcollection.asme.org/IDETC-CIE/proceedings-abstract/IDETC-CIE2019/59216/V003T01A021/1069886
0	T Koji, T Kanji	Self-Supervised Learning and Network Architecture Search for Domain-Adaptive Landmark Detector		osf.io		https://osf.io/26xnj/download	https://osf.io/26xnj/download
0	A Rivail, U Schmidt-Erfurth, WD Vogl…	Correction to: Modeling Disease Progression in Retinal OCTs with Longitudinal Self-supervised Learning	2019	… Workshop on PRedictive …	Springer	https://link.springer.com/content/pdf/10.1007/978-3-030-32281-6_19.pdf	https://link.springer.com/content/pdf/10.1007/978-3-030-32281-6_19.pdf
0	M Han, Z Pan, T Xue, Q Shao, J Ma, W Wang	Object-Agnostic Suction Grasp Affordance Detection in Dense Cluster Using Self-Supervised Learning. docx	2019	arXiv preprint arXiv …	arxiv.org	https://arxiv.org/abs/1906.02995	https://arxiv.org/abs/1906.02995
0	AX Lee, F Ebert, R Zhang, C Finn, P Abbeel, S Levine	Self-Supervised Learning of Object Motion Through Adversarial Video Prediction	2018		openreview.net	https://openreview.net/forum?id=HJrJpzZRZ&noteId=HJrJpzZRZ	https://openreview.net/forum?id=HJrJpzZRZ&noteId=HJrJpzZRZ
0	P FUCHS, T KRÖGER, CS GARBE	Self-supervised Learning for Pore Detection in CT-Scans of Cast Aluminum Parts		ndt.net		https://www.ndt.net/article/dir2019/papers/We.1.A.1.pdf	https://www.ndt.net/article/dir2019/papers/We.1.A.1.pdf
0	J Andrade, S Pedro, AP Almeida	Self-supervised learning of motion-induced acoustic noise awareness in social robots	2019	Journal of Automation Mobile …	yadda.icm.edu.pl	http://yadda.icm.edu.pl/yadda/element/bwmeta1.element.baztech-be3307bc-95ca-46a5-a836-02a8abc526cb	http://yadda.icm.edu.pl/yadda/element/bwmeta1.element.baztech-be3307bc-95ca-46a5-a836-02a8abc526cb
0	Y Zhang, S Khamis, C Rhemann, J Valentin, A Kowdle…	ActiveStereoNet: End-to-End Self-Supervised Learning for Active Stereo Systems (Supplementary Materials)		vision.princeton.edu		https://vision.princeton.edu/projects/2018/activestereonet/supp.pdf	https://vision.princeton.edu/projects/2018/activestereonet/supp.pdf
0	O Sümer, T Dencker, B Ommer	Self-supervised Learning of Pose Embeddings from Spatiotemporal Relations in Videos Supplementary Material		openaccess.thecvf.com		http://openaccess.thecvf.com/content_ICCV_2017/supplemental/Sumer_Self-Supervised_Learning_of_ICCV_2017_supplemental.pdf	http://openaccess.thecvf.com/content_ICCV_2017/supplemental/Sumer_Self-Supervised_Learning_of_ICCV_2017_supplemental.pdf
0	D Weber, C Gühmann	A New State of Health Diagnosis Method Utilizing Self-Supervised Deep Learning Via Virtual Tests	2019	Meeting Abstracts	The Electrochemical Society
0	D Novotny, S Albanie, D Larlus, A Vedaldi	Self-supervised Learning of Geometrically Stable Features Through Probabilistic Introspection Supplementary Material		openaccess.thecvf.com		http://openaccess.thecvf.com/content_cvpr_2018/Supplemental/2827-supp.pdf	http://openaccess.thecvf.com/content_cvpr_2018/Supplemental/2827-supp.pdf
0	S Qian, W Cao, R Li, S Wu	Self-supervised GAN for Image Generation by Correlating Image Channels	2018	Pacific Rim Conference on Multimedia	Springer	https://link.springer.com/chapter/10.1007/978-3-030-00767-6_8	https://link.springer.com/chapter/10.1007/978-3-030-00767-6_8
0	J Iqbal, M Ali	MLSL: Multi-Level Self-Supervised Learning for Domain Adaptation with Spatially Independent and Semantically Consistent Labeling	2020	The IEEE Winter Conference on Applications …	openaccess.thecvf.com	http://openaccess.thecvf.com/content_WACV_2020/html/Iqbal_MLSL_Multi-Level_Self-Supervised_Learning_for_Domain_Adaptation_with_Spatially_Independent_WACV_2020_paper.html	http://openaccess.thecvf.com/content_WACV_2020/html/Iqbal_MLSL_Multi-Level_Self-Supervised_Learning_for_Domain_Adaptation_with_Spatially_Independent_WACV_2020_paper.html
0	AA Deshmukh, A Kumar, L Boyles, D Charles…	Self-Supervised Contextual Bandits in Computer Vision	2020	arXiv preprint arXiv …	arxiv.org	https://arxiv.org/abs/2003.08485	https://arxiv.org/abs/2003.08485
0	P Kicki, T Gawron, P Skrzypczyński	A Self-Supervised Learning Approach to Rapid Path Planning for Car-Like Vehicles Maneuvering in Urban Environment	2020	arXiv preprint arXiv:2003.00946	arxiv.org	https://arxiv.org/abs/2003.00946	https://arxiv.org/abs/2003.00946
0	I Albuquerque, N Naik, J Li, N Keskar…	Improving out-of-distribution generalization via multi-task self-supervised pretraining	2020	arXiv preprint arXiv …	arxiv.org	https://arxiv.org/abs/2003.13525	https://arxiv.org/abs/2003.13525
0	RE Zezario12, T Hussain, X Lu, HM Wang, Y Tsao	SELF-SUPERVISED DENOISING AUTOENCODER WITH LINEAR REGRESSION DECODER FOR SPEECH ENHANCEMENT		citi.sinica.edu.tw		https://www.citi.sinica.edu.tw/papers/yu.tsao/7176-F.pdf	https://www.citi.sinica.edu.tw/papers/yu.tsao/7176-F.pdf
0	R Imamura, T Itasaka, M Okuda	Self-supervised Hyperspectral Image Restoration using Separable Image Prior	2019	arXiv preprint arXiv:1907.00651	arxiv.org	https://arxiv.org/abs/1907.00651	https://arxiv.org/abs/1907.00651
0	JCK Chow, SK Boyd, DD Lichti, JL Ronsky	Robust Self-Supervised Learning of Deterministic Errors in Single-Plane (Monoplanar) and Dual-Plane (Biplanar) X-ray Fluoroscopy	2020	arXiv preprint arXiv …	arxiv.org	https://arxiv.org/abs/2001.00686	https://arxiv.org/abs/2001.00686
0	K Baek, M Lee, H Shim	PsyNet: Self-supervised Approach to Object Localization Using Point Symmetric Transformation		aaai.org		https://www.aaai.org/Papers/AAAI/2020GB/AAAI-BaekK.206.pdf	https://www.aaai.org/Papers/AAAI/2020GB/AAAI-BaekK.206.pdf
0	Q Dai, V Patil, S Hecker, D Dai, L Van Gool…	Self-supervised Object Motion and Depth Estimation from Video	2019	arXiv preprint arXiv …	arxiv.org	https://arxiv.org/abs/1912.04250	https://arxiv.org/abs/1912.04250
0	SA Hamideche, F Chiaroni, MC Rahal	Self-supervised classification of dynamic obstacles using the temporal information provided by videos	2019	arXiv preprint arXiv:1910.09094	arxiv.org	https://arxiv.org/abs/1910.09094	https://arxiv.org/abs/1910.09094
0	H Shim, HS Heo, J Jung, HJ Yu	Self-supervised pre-training with acoustic configurations for replay spoofing detection	2019	arXiv preprint arXiv:1910.09778	arxiv.org	https://arxiv.org/abs/1910.09778	https://arxiv.org/abs/1910.09778
0	DP Gandhi	Self-Supervised Robot Learning	2019		ri.cmu.edu	https://www.ri.cmu.edu/wp-content/uploads/2019/06/dgandhi_thesis.pdf	https://www.ri.cmu.edu/wp-content/uploads/2019/06/dgandhi_thesis.pdf
0	A Johnston, G Carneiro	Single View 3D Point Cloud Reconstruction using Novel View Synthesis and Self-Supervised Depth Estimation	2019	2019 Digital Image Computing …	ieeexplore.ieee.org	https://ieeexplore.ieee.org/abstract/document/8945841/	https://ieeexplore.ieee.org/abstract/document/8945841/
0	J Jiao, R Droste, L Drukker, AT Papageorghiou…	Self-supervised Representation Learning for Ultrasound Video	2020	arXiv preprint arXiv …	arxiv.org	https://arxiv.org/abs/2003.00105	https://arxiv.org/abs/2003.00105
0	Z Zeng, Y Xulei, Y Qiyun, Y Meng, Z Le	SeSe-Net: Self-Supervised deep learning for segmentation	2019	Pattern Recognition Letters	Elsevier	https://www.sciencedirect.com/science/article/pii/S0167865519302144	https://www.sciencedirect.com/science/article/pii/S0167865519302144
0	Z Feng, C Xu, D Tao	Self-Supervised Representation Learning by Rotation Feature Decoupling Supplementary Material		zpascal.net		https://zpascal.net/cvpr2019/Feng_Self-Supervised_Representation_Learning_CVPR_2019_supplemental.pdf	https://zpascal.net/cvpr2019/Feng_Self-Supervised_Representation_Learning_CVPR_2019_supplemental.pdf
0	D Kim	Reducing human supervision in supervised learning= 약한 지도를 통한 물체 인식 학습	2018		koasas.kaist.ac.kr	https://koasas.kaist.ac.kr/handle/10203/266704	https://koasas.kaist.ac.kr/handle/10203/266704
0	J Zürn, W Burgard, A Valada	Self-Supervised Visual Terrain Classification from Unsupervised Acoustic Feature Learning	2019	arXiv preprint arXiv:1912.03227	arxiv.org	https://arxiv.org/abs/1912.03227	https://arxiv.org/abs/1912.03227
0	L Lin, D Zhang, P Luo, W Zuo	Self-supervised Structure-Sensitive Learning for Human Parsing	2020	Human Centric Visual Analysis with Deep …	Springer	https://link.springer.com/chapter/10.1007/978-981-13-2387-4_5	https://link.springer.com/chapter/10.1007/978-981-13-2387-4_5
0	N Le	Evolving Self-supervised Neural Networks: Autonomous Intelligence from Evolved Self-teaching	2019	arXiv preprint arXiv:1906.08865	arxiv.org	https://arxiv.org/abs/1906.08865	https://arxiv.org/abs/1906.08865
0	J Hur, S Roth	Self-Supervised Monocular Scene Flow Estimation	2020	arXiv preprint arXiv:2004.04143	arxiv.org	https://arxiv.org/abs/2004.04143	https://arxiv.org/abs/2004.04143
0	D Zhang	Bridging Adversarial Robustness and Semi/Self/Un-supervised Learning		zdhnarsil.github.io		https://zdhnarsil.github.io/files/submission_for_queer.pdf	https://zdhnarsil.github.io/files/submission_for_queer.pdf
0	D Dwibedi, J Tompson, C Lynch, P Sermanet	Self-Supervised Representation Learning for Continuous Control	2018		cs.unm.edu	https://www.cs.unm.edu/amprg/Workshops/MLPC18/submissions/paper_10.pdf	https://www.cs.unm.edu/amprg/Workshops/MLPC18/submissions/paper_10.pdf
0	A Alvarez-Gila, A Galdran, E Garrote…	Self-supervised blur detection from synthetically blurred scenes	2019	Image and Vision …	Elsevier	https://www.sciencedirect.com/science/article/pii/S0262885619301234	https://www.sciencedirect.com/science/article/pii/S0262885619301234
0	B Fernando, H Bilen, E Gavves, S Gould	Self-Supervised Video Representation Learning With Odd-One-Out Networks: CVPR 2017: 21-26 July 2016, Honolulu, Hawaii: proceedings	2017		dare.uva.nl	https://dare.uva.nl/personal/pure/en/publications/selfsupervised-video-representation-learning-with-oddoneout-networks(6a109f0a-05f0-4c50-8541-df3df2186d30).html	https://dare.uva.nl/personal/pure/en/publications/selfsupervised-video-representation-learning-with-oddoneout-networks(6a109f0a-05f0-4c50-8541-df3df2186d30).html
0	A Harakeh, D Asmar, E Shammas	Self-supervised free space estimation in outdoor terrain	2018	Robotica	cambridge.org	https://www.cambridge.org/core/journals/robotica/article/selfsupervised-free-space-estimation-in-outdoor-terrain/2BBB34897E3D940EEEAFA39E1BECF0B9	https://www.cambridge.org/core/journals/robotica/article/selfsupervised-free-space-estimation-in-outdoor-terrain/2BBB34897E3D940EEEAFA39E1BECF0B9
0	J Knights, A Vanderkop, D Ward…	Temporally Coherent Embeddings for Self-Supervised Video Representation Learning	2020	arXiv preprint arXiv …	arxiv.org	https://arxiv.org/abs/2004.02753	https://arxiv.org/abs/2004.02753
0	T Takahashi	Efficient Self-supervised Deep Sensorimotor Learning in Robotics	2019		scholarworks.umass.edu	https://scholarworks.umass.edu/dissertations_2/1769/	https://scholarworks.umass.edu/dissertations_2/1769/
0	A Kolesnikov, X Zhai, L Beyer	Revisiting Self-Supervised Visual Representation Learning: Supplementary Material		zpascal.net		https://www.zpascal.net/cvpr2019/Kolesnikov_Revisiting_Self-Supervised_Visual_CVPR_2019_supplemental.pdf	https://www.zpascal.net/cvpr2019/Kolesnikov_Revisiting_Self-Supervised_Visual_CVPR_2019_supplemental.pdf
0	Y Zhang, X Di, B Zhang, C Wang	Self-supervised Image Enhancement Network: Training with Low Light Images Only	2020	arXiv	ui.adsabs.harvard.edu	https://ui.adsabs.harvard.edu/abs/2020arXiv200211300Z/abstract	https://ui.adsabs.harvard.edu/abs/2020arXiv200211300Z/abstract
0	TW Tsai, C Li, J Zhu	DL: Deep Self-Semi-Supervised Learning for Image Recognition	2019	arXiv preprint arXiv:1905.13305	arxiv.org	https://arxiv.org/abs/1905.13305	https://arxiv.org/abs/1905.13305
0	E Wang	Self-Supervised Task Discovery		eliaswang.com		https://www.eliaswang.com/files/task-discovery-cs331b.pdf	https://www.eliaswang.com/files/task-discovery-cs331b.pdf
0	K Liang, L Zhang, Y Yang, H Yang…	A Self-supervised Deep Learning Network for Low-Dose CT Reconstruction	2018	2018 IEEE Nuclear …	ieeexplore.ieee.org	https://ieeexplore.ieee.org/abstract/document/8824600/	https://ieeexplore.ieee.org/abstract/document/8824600/
0	P Agarwal, A Sinha, K Ayush	Is Self-Supervision Helpful? Exploring Self-Supervision in Reinforcement Learning and Classification		stanford-cs221.github.io		https://stanford-cs221.github.io/autumn2019-extra/posters/110.pdf	https://stanford-cs221.github.io/autumn2019-extra/posters/110.pdf
0	Y Wu	An improved self-supervised framework for feature point detection	2019	Eleventh International Conference on Digital Image …	spiedigitallibrary.org	https://www.spiedigitallibrary.org/conference-proceedings-of-spie/11179/1117927/An-improved-self-supervised-framework-for-feature-point-detection/10.1117/12.2540147.short	https://www.spiedigitallibrary.org/conference-proceedings-of-spie/11179/1117927/An-improved-self-supervised-framework-for-feature-point-detection/10.1117/12.2540147.short
0	V Sharma, M Tapaswi, MS Sarfraz…	Video Face Clustering with Self-Supervised Representation Learning	2019	IEEE Transactions on …	ieeexplore.ieee.org	https://ieeexplore.ieee.org/abstract/document/8873682/	https://ieeexplore.ieee.org/abstract/document/8873682/
0	B Gfeller, C Frank, D Roblek, M Sharifi…	SPICE: Self-supervised Pitch Estimation	2019	arXiv preprint arXiv …	arxiv.org	https://arxiv.org/abs/1910.11664	https://arxiv.org/abs/1910.11664
0	S Löwe, P O'Connor, BS Veeling	Greedy InfoMax for Self-Supervised Representation Learning	2019		loewex.github.io	https://loewex.github.io/Thesis_SindyLoewe_GreedyInfoMax.pdf	https://loewex.github.io/Thesis_SindyLoewe_GreedyInfoMax.pdf
0	X Xu, PP Liang	Self-Supervised Dueling Networks for Deep Reinforcement Learning		pdfs.semanticscholar.org		https://pdfs.semanticscholar.org/e810/28ce5cbd32cb3c8068271935d1b2f77570fc.pdf	https://pdfs.semanticscholar.org/e810/28ce5cbd32cb3c8068271935d1b2f77570fc.pdf
0	S Nedelkoski, J Bogatinovski, A Acker…	Self-Supervised Log Parsing	2020	arXiv preprint arXiv …	arxiv.org	https://arxiv.org/abs/2003.07905	https://arxiv.org/abs/2003.07905
0	R Zhang	Image Synthesis for Self-Supervised Visual Representation Learning	2018		escholarship.org	https://escholarship.org/content/qt7wp6r5mx/qt7wp6r5mx.pdf	https://escholarship.org/content/qt7wp6r5mx/qt7wp6r5mx.pdf
0	S Löwe, P O'Connor, BS Veeling	Greedy InfoMax for Biologically Plausible Self-Supervised Representation Learning	2019	arXiv preprint arXiv:1905.11786	arxiv.org	https://arxiv.org/abs/1905.11786	https://arxiv.org/abs/1905.11786
0	Z Peng, Y Dong, M Luo, XM Wu, Q Zheng	Self-Supervised Graph Representation Learning via Global Context Prediction	2020	arXiv preprint arXiv …	arxiv.org	https://arxiv.org/abs/2003.01604	https://arxiv.org/abs/2003.01604
0	D Park, CW Ahn	Self-Supervised Contextual Data Augmentation for Natural Language Processing	2019	Symmetry	mdpi.com	https://www.mdpi.com/2073-8994/11/11/1393	https://www.mdpi.com/2073-8994/11/11/1393
0	X Hu, L Wen, Y Xu, C Zhang, PS Yu	SelfORE: Self-supervised Relational Feature Learning for Open Relation Extraction	2020	arXiv preprint arXiv:2004.02438	arxiv.org	https://arxiv.org/abs/2004.02438	https://arxiv.org/abs/2004.02438
0	X Liu, A Sinha, M Ishii, GD Hager, RH Taylor…	Self-supervised Dense 3D Reconstruction from Monocular Endoscopic Video	2019	arXiv preprint arXiv …	arxiv.org	https://arxiv.org/abs/1909.03101	https://arxiv.org/abs/1909.03101
0	M Minderer, O Bachem, N Houlsby…	Automatic Shortcut Removal for Self-Supervised Representation Learning	2020	arXiv preprint arXiv …	arxiv.org	https://arxiv.org/abs/2002.08822	https://arxiv.org/abs/2002.08822
0	VT Nguyen, C Lin, CHG Li, SM Guo…	Visual-Guided Robot Arm Using Self-Supervised Deep Convolutional Neural Networks	2019	2019 IEEE 15th …	ieeexplore.ieee.org	https://ieeexplore.ieee.org/abstract/document/8842899/	https://ieeexplore.ieee.org/abstract/document/8842899/
0	K Sheng, W Dong, M Chai, G Wang, P Zhou…	Revisiting Image Aesthetic Assessment via Self-Supervised Feature Learning	2019	arXiv preprint arXiv …	arxiv.org	https://arxiv.org/abs/1911.11419	https://arxiv.org/abs/1911.11419
0	P Poklukar, J Bütepage, D Kragic	Seeing the whole picture instead of a single point: Self-supervised likelihood learning for deep generative models	2019		openreview.net	https://openreview.net/forum?id=HylWY1n4Yr	https://openreview.net/forum?id=HylWY1n4Yr
0	A Tacchetti, S Voinea…	Trading robust representations for sample complexity through self-supervised visual experience	2018	Advances in Neural …	papers.nips.cc	http://papers.nips.cc/paper/8170-trading-robust-representations-for-sample-complexity-through-self-supervised-visual-experience	http://papers.nips.cc/paper/8170-trading-robust-representations-for-sample-complexity-through-self-supervised-visual-experience
0	A Eitel, N Hauff, W Burgard	Self-supervised Transfer Learning for Instance Segmentation through Physical Interaction	2019	2019 IEEE/RSJ International …	pdfs.semanticscholar.org	https://pdfs.semanticscholar.org/eeb5/8dffd4bb6f2f338d75db98bbcfa68f6bfa10.pdf	https://pdfs.semanticscholar.org/eeb5/8dffd4bb6f2f338d75db98bbcfa68f6bfa10.pdf
0	A Newell, J Deng	How Useful is Self-Supervised Pretraining for Visual Tasks?	2020	arXiv preprint arXiv:2003.14323	arxiv.org	https://arxiv.org/abs/2003.14323	https://arxiv.org/abs/2003.14323
0	F Lin, H Xu, H Li, H Xiong, GJ Qi	AETv2: AutoEncoding Transformations for Self-Supervised Representation Learning by Minimizing Geodesic Distances in Lie Groups	2019	arXiv preprint arXiv:1911.07004	arxiv.org	https://arxiv.org/abs/1911.07004	https://arxiv.org/abs/1911.07004
0	B Cao, H Zhang, N Wang, X Gao, D Shen	Auto-GAN: Self-Supervised Collaborative Learning for Medical Image Synthesis		aaai.org		https://www.aaai.org/Papers/AAAI/2020GB/AAAI-CaoB.4548.pdf	https://www.aaai.org/Papers/AAAI/2020GB/AAAI-CaoB.4548.pdf
0	Z Zhang, Z Lin, H Pfister	White-Box Adversarial Defense via Self-Supervised Data Estimation	2019		merl.com	http://www.merl.com/publications/docs/TR2019-104.pdf	http://www.merl.com/publications/docs/TR2019-104.pdf
0	Z Lin, H Pfister, Z Zhang	White-Box Adversarial Defense via Self-Supervised Data Estimation	2019	arXiv preprint arXiv:1909.06271	arxiv.org	https://arxiv.org/abs/1909.06271	https://arxiv.org/abs/1909.06271
0	W Shimoda, K Yanai	Self-supervised Difference Detection for Refinement CRF and Seed Interpolation		openaccess.thecvf.com		http://openaccess.thecvf.com/content_CVPRW_2019/papers/Weakly%20Supervised%20Learning%20for%20Real-World%20Computer%20Vision%20Applications/Shimoda_Self-supervised_Difference_Detection_for_Refinement_CRF_and_Seed_Interpolation_CVPRW_2019_paper.pdf	http://openaccess.thecvf.com/content_CVPRW_2019/papers/Weakly%20Supervised%20Learning%20for%20Real-World%20Computer%20Vision%20Applications/Shimoda_Self-supervised_Difference_Detection_for_Refinement_CRF_and_Seed_Interpolation_CVPRW_2019_paper.pdf
0	H Dinkel, P Zhang, M Wu, K Yu	Depa: Self-supervised audio embedding for depression detection	2019	arXiv preprint arXiv:1910.13028	arxiv.org	https://arxiv.org/abs/1910.13028	https://arxiv.org/abs/1910.13028
0	R Huang, W Xu, TY Lee, A Cherian…	FX-GAN: Self-Supervised GAN Learning via Feature Exchange	2020	The IEEE Winter …	openaccess.thecvf.com	http://openaccess.thecvf.com/content_WACV_2020/html/Huang_FX-GAN_Self-Supervised_GAN_Learning_via_Feature_Exchange_WACV_2020_paper.html	http://openaccess.thecvf.com/content_WACV_2020/html/Huang_FX-GAN_Self-Supervised_GAN_Learning_via_Feature_Exchange_WACV_2020_paper.html
0	F Galli, A Ritacco, G Lanciano, M Vannocci…	Self-supervised pre-training of CNNs for flatness defect classification in the steelworks industry	2020	International Journal of …	mail.ijain.org	http://mail.ijain.org/index.php/IJAIN/article/view/410	http://mail.ijain.org/index.php/IJAIN/article/view/410
0	MH Chen, B Li, Y Bao, G AlRegib, Z Kira	Action Segmentation with Joint Self-Supervised Temporal Domain Adaptation	2020	arXiv preprint arXiv:2003.02824	arxiv.org	https://arxiv.org/abs/2003.02824	https://arxiv.org/abs/2003.02824
0	T Gröndahl, A Samuelsson	Self-Supervised Cross-Connected CNNs for Binocular Disparity Estimation	2018		odr.chalmers.se	https://odr.chalmers.se/handle/20.500.12380/255458	https://odr.chalmers.se/handle/20.500.12380/255458
0	W Shi, Z Wang, S Song, G Huang	Self-Supervised Discovering of Causal Features: Towards Interpretable Reinforcement Learning	2020	arXiv preprint arXiv:2003.07069	arxiv.org	https://arxiv.org/abs/2003.07069	https://arxiv.org/abs/2003.07069
0	P Liu, J Janai, M Pollefeys, T Sattler…	Self-Supervised Linear Motion Deblurring	2020	IEEE Robotics and …	ieeexplore.ieee.org	https://ieeexplore.ieee.org/abstract/document/8990020/	https://ieeexplore.ieee.org/abstract/document/8990020/
0	Y Wang, J Zhang, M Kan, S Shan, X Chen	Self-supervised Equivariant Attention Mechanism for Weakly Supervised Semantic Segmentation	2020	arXiv preprint arXiv …	arxiv.org	https://arxiv.org/abs/2004.04581	https://arxiv.org/abs/2004.04581
0	J Liu, L Cao, O Akin, Y Tian	Accurate and Robust Pulmonary Nodule Detection by 3D Feature Pyramid Network with Self-supervised Feature Learning	2019	arXiv preprint arXiv:1907.11704	arxiv.org	https://arxiv.org/abs/1907.11704	https://arxiv.org/abs/1907.11704
0	Y Yuan, J Hou, A Nüchter, S Schwertfeger	Self-supervised Point Set Local Descriptors for Point Cloud Registration	2020	arXiv preprint arXiv …	arxiv.org	https://arxiv.org/abs/2003.05199	https://arxiv.org/abs/2003.05199
0	E Amrani, R Ben-Ari, D Rotman, A Bronstein	Noise Estimation Using Density Estimation for Self-Supervised Multimodal Learning	2020	arXiv preprint arXiv …	arxiv.org	https://arxiv.org/abs/2003.03186	https://arxiv.org/abs/2003.03186
0	JN Kundu, S Seth, V Jampani, M Rakesh…	Self-Supervised 3D Human Pose Estimation via Part Guided Novel Image Synthesis	2020	arXiv preprint arXiv …	arxiv.org	https://arxiv.org/abs/2004.04400	https://arxiv.org/abs/2004.04400
0	SK Mustikovela, V Jampani, S De Mello, S Liu…	Self-Supervised Viewpoint Learning From Image Collections	2020	arXiv preprint arXiv …	arxiv.org	https://arxiv.org/abs/2004.01793	https://arxiv.org/abs/2004.01793
0	X Meng, CH Ganoe, RT Sieberg, YY Cheung…	Self-Supervised Contextual Language Representation of Radiology Reports to Improve the Identification of Communication Urgency	2019	arXiv preprint arXiv …	arxiv.org	https://arxiv.org/abs/1912.02703	https://arxiv.org/abs/1912.02703
0	Z He, Y Zhang, Y Wang	Self-supervised Image Classification based on the Distances of Deep Feature Space	2019	… of the 3rd International Conference on Video …	dl.acm.org	https://dl.acm.org/doi/abs/10.1145/3376067.3376106	https://dl.acm.org/doi/abs/10.1145/3376067.3376106
0	J Shen, Z Shen, C Xiong, C Wang, K Wang…	TaxoExpan: Self-supervised Taxonomy Expansion with Position-Enhanced Graph Neural Network	2020	arXiv preprint arXiv …	arxiv.org	https://arxiv.org/abs/2001.09522	https://arxiv.org/abs/2001.09522
0	M Li, W Hsu, X Xie, J Cong…	SACNN: Self-Attention Convolutional Neural Network for Low-Dose CT Denoising with Self-supervised Perceptual Loss Network	2020	IEEE Transactions on …	ieeexplore.ieee.org	https://ieeexplore.ieee.org/abstract/document/8964295/	https://ieeexplore.ieee.org/abstract/document/8964295/
0	J Tang, H Kim, V Guizilini, S Pillai, R Ambrus	Neural Outlier Rejection for Self-Supervised Keypoint Learning	2019	arXiv preprint arXiv …	arxiv.org	https://arxiv.org/abs/1912.10615	https://arxiv.org/abs/1912.10615
0	Z Li, J Cao, H Wang, M Zhao	Sparsely Self-Supervised Generative Adversarial Nets for Radio Frequency Estimation	2019	IEEE Journal on Selected Areas …	ieeexplore.ieee.org	https://ieeexplore.ieee.org/abstract/document/8794603/	https://ieeexplore.ieee.org/abstract/document/8794603/
0	D Pathak	Learning to Generalize via Self-Supervised Prediction	2019		pdfs.semanticscholar.org	https://pdfs.semanticscholar.org/2f2e/3e219ac3a149673967d3a6ba231fb299905a.pdf	https://pdfs.semanticscholar.org/2f2e/3e219ac3a149673967d3a6ba231fb299905a.pdf
0	W Khademi, S Rao, C Minnerath, G Hagen…	Self-Supervised Poisson-Gaussian Denoising	2020	arXiv preprint arXiv …	arxiv.org	https://arxiv.org/abs/2002.09558	https://arxiv.org/abs/2002.09558
0	J Wang, S Zhu, J Xu, D Cao	The Retrieval of the Beautiful: Self-Supervised Salient Object Detection for Beauty Product Retrieval	2019	Proceedings of the 27th ACM International …	dl.acm.org	https://dl.acm.org/doi/abs/10.1145/3343031.3356059	https://dl.acm.org/doi/abs/10.1145/3343031.3356059
0	Z Lai, E Lu, W Xie	MAST: A Memory-Augmented Self-supervised Tracker	2020	arXiv preprint arXiv:2002.07793	arxiv.org	https://arxiv.org/abs/2002.07793	https://arxiv.org/abs/2002.07793
0	P Sharma, Y Li	Self-Supervised Contextual Keyword and Keyphrase Retrieval with Self-Labelling	2019		preprints.org	https://www.preprints.org/manuscript/201908.0073	https://www.preprints.org/manuscript/201908.0073
0	M Caron, A Morcos, P Bojanowski, J Mairal…	Pruning Convolutional Neural Networks with Self-Supervision	2020	arXiv preprint arXiv …	arxiv.org	https://arxiv.org/abs/2001.03554	https://arxiv.org/abs/2001.03554
0	S Pillai, J Leonard	Self-Supervised Visual Place Recognition Learning in Mobile Robots	2019	arXiv preprint arXiv:1905.04453	arxiv.org	https://arxiv.org/abs/1905.04453	https://arxiv.org/abs/1905.04453
0	A Baevski, M Auli, A Mohamed	Effectiveness of self-supervised pre-training for speech recognition	2019	arXiv preprint arXiv:1911.03912	arxiv.org	https://arxiv.org/abs/1911.03912	https://arxiv.org/abs/1911.03912
0	S Daftry, Y Agrawal, L Matthies	Online Self-Supervised Long-Range Scene Segmentation for MAVs	2018	2018 IEEE/RSJ International …	ieeexplore.ieee.org	https://ieeexplore.ieee.org/abstract/document/8594405/	https://ieeexplore.ieee.org/abstract/document/8594405/
0	C Niu, J Zhang, G Wang, J Liang	GATCluster: Self-Supervised Gaussian-Attention Network for Image Clustering	2020	arXiv preprint arXiv:2002.11863	arxiv.org	https://arxiv.org/abs/2002.11863	https://arxiv.org/abs/2002.11863
0	K Zhang, Y Zhang, HD Cheng	Self-Supervised Structure Learning for Crack Detection Based on Cycle-Consistent Generative Adversarial Networks	2020	Journal of Computing in Civil …	ascelibrary.org	https://ascelibrary.org/doi/abs/10.1061/%28ASCE%29CP.1943-5487.0000883	https://ascelibrary.org/doi/abs/10.1061/%28ASCE%29CP.1943-5487.0000883
0	S Pillai	Towards Richer and Self-Supervised Perception in Robots	2017		pdfs.semanticscholar.org	https://pdfs.semanticscholar.org/cb32/c1a5198dcb935b0c0d6b7b0c862f1f66ef84.pdf	https://pdfs.semanticscholar.org/cb32/c1a5198dcb935b0c0d6b7b0c862f1f66ef84.pdf
0	D Sitnik, I Kopriva	Robust Self-Supervised Convolutional Neural Network for Subspace Clustering and Classification	2020	arXiv preprint arXiv:2004.03375	arxiv.org	https://arxiv.org/abs/2004.03375	https://arxiv.org/abs/2004.03375
0	M Szafraniec, G Marti, P Donnat	Putting Self-Supervised Token Embedding on the Tables	2017	2017 16th IEEE International …	ieeexplore.ieee.org	https://ieeexplore.ieee.org/abstract/document/8260715/	https://ieeexplore.ieee.org/abstract/document/8260715/
0	ZW Hong, TJ Fu, TY Shann, YH Chang…	Adversarial Exploration Strategy for Self-Supervised Imitation Learning	2018	arXiv preprint arXiv …	arxiv.org	https://arxiv.org/abs/1806.10019	https://arxiv.org/abs/1806.10019
0	ÁS Hervella, J Rouco, J Novo, M Ortega	Learning the retinal anatomy from scarce annotated data using self-supervised multimodal reconstruction	2020	Applied Soft Computing	Elsevier	https://www.sciencedirect.com/science/article/pii/S1568494620301502	https://www.sciencedirect.com/science/article/pii/S1568494620301502
0	T Chen, S Liu, S Chang, Y Cheng, L Amini…	Adversarial Robustness: From Self-Supervised Pre-Training to Fine-Tuning	2020	arXiv preprint arXiv …	arxiv.org	https://arxiv.org/abs/2003.12862	https://arxiv.org/abs/2003.12862
0	E Racah, C Pal	Supervise Thyself: Examining Self-Supervised Representations in Interactive Environments	2019	arXiv preprint arXiv:1906.11951	arxiv.org	https://arxiv.org/abs/1906.11951	https://arxiv.org/abs/1906.11951
0	VR Kumar, SA Hiremath, S Milz, C Witt…	FisheyeDistanceNet: Self-Supervised Scale-Aware Distance Estimation using Monocular Fisheye Camera for Autonomous Driving	2019	arXiv preprint arXiv …	arxiv.org	https://arxiv.org/abs/1910.04076	https://arxiv.org/abs/1910.04076
0	TM Paixao, RF Berriel, M Boeres, AL Koerich…	Fast (er) Reconstruction of Shredded Text Documents via Self-Supervised Deep Asymmetric Metric Learning	2020	arXiv preprint arXiv …	arxiv.org	https://arxiv.org/abs/2003.10063	https://arxiv.org/abs/2003.10063
0	R Tachibana, JJ Näppi, T Hironaka…	Self-supervised generative adversarial network for electronic cleansing in dual-energy CT colonography	2020	Medical Imaging 2020 …	spiedigitallibrary.org	https://www.spiedigitallibrary.org/conference-proceedings-of-spie/11318/113181E/Self-supervised-generative-adversarial-network-for-electronic-cleansing-in-dual/10.1117/12.2549234.short	https://www.spiedigitallibrary.org/conference-proceedings-of-spie/11318/113181E/Self-supervised-generative-adversarial-network-for-electronic-cleansing-in-dual/10.1117/12.2549234.short
0	OG Holmberg, ND Koehler, T Martins, J Siedlecki…	Self-supervised retinal thickness prediction enables deep learning from unlabeled data to boost classification of diabetic retinopathy	2020	bioRxiv	biorxiv.org	https://www.biorxiv.org/content/10.1101/861757v2.abstract	https://www.biorxiv.org/content/10.1101/861757v2.abstract
0	W Wu, Z Wang, Z Li, W Liu, L Fuxin	PointPWC-Net: A Coarse-to-Fine Network for Supervised and Self-Supervised Scene Flow Estimation on 3D Point Clouds	2019	arXiv preprint arXiv:1911.12408	arxiv.org	https://arxiv.org/abs/1911.12408	https://arxiv.org/abs/1911.12408
0	Y Kim, S Choi, H Lee, T Kim…	RPM-Net: Robust Pixel-Level Matching Networks for Self-Supervised Video Object Segmentation	2020	The IEEE Winter …	openaccess.thecvf.com	http://openaccess.thecvf.com/content_WACV_2020/html/Kim_RPM-Net_Robust_Pixel-Level_Matching_Networks_for_Self-Supervised_Video_Object_Segmentation_WACV_2020_paper.html	http://openaccess.thecvf.com/content_WACV_2020/html/Kim_RPM-Net_Robust_Pixel-Level_Matching_Networks_for_Self-Supervised_Video_Object_Segmentation_WACV_2020_paper.html
0	J Lahoud, B Ghanem	RGB-based Semantic Segmentation Using Self-Supervised Depth Pre-Training	2020	arXiv preprint arXiv:2002.02200	arxiv.org	https://arxiv.org/abs/2002.02200	https://arxiv.org/abs/2002.02200
0	YLK Li, S Jiang12, Z Zhang, C Huang, RY Da Xu	Geometry-driven Self-supervised Method for 3D Human Pose Estimation		aaai.org		https://www.aaai.org/Papers/AAAI/2020GB/AAAI-LiY.7454.pdf	https://www.aaai.org/Papers/AAAI/2020GB/AAAI-LiY.7454.pdf
0	D Ginzburg, D Raviv	Cyclic Functional Mapping: Self-supervised correspondence between non-isometric deformable shapes	2019	arXiv preprint arXiv:1912.01249	arxiv.org	https://arxiv.org/abs/1912.01249	https://arxiv.org/abs/1912.01249
0	K Ramachandruni, M Vankadari…	SMAK-Net: Self-Supervised Multi-level Spatial Attention Network for Knowledge Representation towards Imitation Learning	2019	2019 28th IEEE …	ieeexplore.ieee.org	https://ieeexplore.ieee.org/abstract/document/8956303/	https://ieeexplore.ieee.org/abstract/document/8956303/
0	X Chen, Q Wang, J Ge, Y Zhang, J Han	Non-destructive three-dimensional measurement of hand vein based on self-supervised network	2019	arXiv preprint arXiv:1907.00215	arxiv.org	https://arxiv.org/abs/1907.00215	https://arxiv.org/abs/1907.00215
0	D Mandal, S Bharadwaj…	A Novel Self-Supervised Re-labeling Approach for Training with Noisy Labels	2020	The IEEE Winter …	openaccess.thecvf.com	http://openaccess.thecvf.com/content_WACV_2020/html/Mandal_A_Novel_Self-Supervised_Re-labeling_Approach_for_Training_with_Noisy_Labels_WACV_2020_paper.html	http://openaccess.thecvf.com/content_WACV_2020/html/Mandal_A_Novel_Self-Supervised_Re-labeling_Approach_for_Training_with_Noisy_Labels_WACV_2020_paper.html
0	Y Chen, W Du, Z Xiang, N Zou, S Chen…	Self-supervised Homography Prediction CNN for Accurate Lane Marking Fitting	2019	Chinese Conference on …	Springer	https://link.springer.com/chapter/10.1007/978-3-030-31726-3_36	https://link.springer.com/chapter/10.1007/978-3-030-31726-3_36
0	Y Xia, P d'Angelo, J Tian, F Fraundorfer…	Self-Supervised Convolutional Neural Networks for Plant Reconstruction Using Stereo Imagery	2019	… engineering & remote …	ingentaconnect.com	https://www.ingentaconnect.com/content/asprs/pers/2019/00000085/00000005/art00016	https://www.ingentaconnect.com/content/asprs/pers/2019/00000085/00000005/art00016
0	IA Siradjuddin, WA Wardana…	Feature Extraction using Self-Supervised Convolutional Autoencoder for Content based Image Retrieval	2019	2019 3rd International …	ieeexplore.ieee.org	https://ieeexplore.ieee.org/abstract/document/8982468/	https://ieeexplore.ieee.org/abstract/document/8982468/
0	RSCBF Anoop, CS Gould	Visual Permutation Learning		pdfs.semanticscholar.org		https://pdfs.semanticscholar.org/6019/e47fb80d0897c49c975e3511820f7bb0060c.pdf	https://pdfs.semanticscholar.org/6019/e47fb80d0897c49c975e3511820f7bb0060c.pdf
0	B Jia, J Brandt, R Mech, B Kim, D Manocha	LPaintB: Learning to Paint from Self-SupervisionLPaintB: Learning to Paint from Self-Supervision	2019	arXiv preprint arXiv …	arxiv.org	https://arxiv.org/abs/1906.06841	https://arxiv.org/abs/1906.06841
0	K Mishchenko, M Montgomery, F Vaggi	A Self-supervised Approach to Hierarchical Forecasting with Applications to Groupwise Synthetic Controls	2019	arXiv preprint arXiv:1906.10586	arxiv.org	https://arxiv.org/abs/1906.10586	https://arxiv.org/abs/1906.10586
0	X Zeng, Y Pan, M Wang, J Zhang, Y Liu	Realistic Face Reenactment via Self-Supervised Disentangling of Identity and Pose	2020	arXiv preprint arXiv:2003.12957	arxiv.org	https://arxiv.org/abs/2003.12957	https://arxiv.org/abs/2003.12957
0	T Zhang, LH Jackson, A Uus, JR Clough…	Self-supervised Recurrent Neural Network for 4D Abdominal and In-utero MR Imaging	2019	… Workshop on Machine …	Springer	https://link.springer.com/chapter/10.1007/978-3-030-33843-5_2	https://link.springer.com/chapter/10.1007/978-3-030-33843-5_2
0	L Story, MA Rutherford, JV Hajnal…	Self-supervised Recurrent Neural Network for 4D Abdominal and In-utero MR Imaging	2019	Machine Learning for …	books.google.com	https://books.google.com/books?hl=en&lr=&id=1sO4DwAAQBAJ&oi=fnd&pg=PA16&dq=%22self-supervised+learning%22&ots=ZeGQXnFIfD&sig=bk-9VYliNOeNldYmgMvHZeBvqE0	https://books.google.com/books?hl=en&lr=&id=1sO4DwAAQBAJ&oi=fnd&pg=PA16&dq=%22self-supervised+learning%22&ots=ZeGQXnFIfD&sig=bk-9VYliNOeNldYmgMvHZeBvqE0
0	TN Le, A Sugimoto, S Ono…	Toward Interactive Self-Annotation For Video Object Bounding Box: Recurrent Self-Learning And Hierarchical Annotation Based Framework	2020	The IEEE Winter …	openaccess.thecvf.com	http://openaccess.thecvf.com/content_WACV_2020/html/Le_Toward_Interactive_Self-Annotation_For_Video_Object_Bounding_Box_Recurrent_Self-Learning_WACV_2020_paper.html	http://openaccess.thecvf.com/content_WACV_2020/html/Le_Toward_Interactive_Self-Annotation_For_Video_Object_Bounding_Box_Recurrent_Self-Learning_WACV_2020_paper.html
0	W Huang, H Li, R Wang, X Zhang, X Wang…	A self‐supervised strategy for fully automatic segmentation of renal dynamic contrast‐enhanced magnetic resonance images	2019	Medical …	Wiley Online Library	https://aapm.onlinelibrary.wiley.com/doi/abs/10.1002/mp.13715	https://aapm.onlinelibrary.wiley.com/doi/abs/10.1002/mp.13715
0	D Kim, S Kim, N Kwak	Textbook Question Answering with Multi-modal Context Graph Understanding and Self-supervised Open-set Comprehension	2018	arXiv preprint arXiv:1811.00232	arxiv.org	https://arxiv.org/abs/1811.00232	https://arxiv.org/abs/1811.00232
0	HM Xu, L Liu, D Gong	Semi-supervised Learning via Conditional Rotation Angle Estimation	2020	arXiv preprint arXiv:2001.02865	arxiv.org	https://arxiv.org/abs/2001.02865	https://arxiv.org/abs/2001.02865
0	A Harakeh	Towards fully self-supervised free space estimation for unmanned ground vehicles	2016		scholarworks.aub.edu.lb	https://scholarworks.aub.edu.lb/bitstream/handle/10938/10973/et-6385.pdf?sequence=1	https://scholarworks.aub.edu.lb/bitstream/handle/10938/10973/et-6385.pdf?sequence=1
0	S Pascual De La Puente	Efficient, end-to-end and self-supervised methods for speech processing and generation	2020		upcommons.upc.edu	https://upcommons.upc.edu/handle/2117/180792	https://upcommons.upc.edu/handle/2117/180792
0	A Velasco, BT James, VD Wells, HZ Girgis	Look4TRs: a de novo tool for detecting simple tandem repeats using self-supervised hidden Markov models	2020	Bioinformatics	academic.oup.com	https://academic.oup.com/bioinformatics/article-abstract/36/2/380/5530162	https://academic.oup.com/bioinformatics/article-abstract/36/2/380/5530162
0	II Alfredo Velasco, BT James, VD Wells, HZ Girgis	Look4TRs: A de-novo tool for detecting simple tandem repeats using self-supervised hidden Markov models		researchgate.net		https://www.researchgate.net/profile/Benjamin_James5/publication/328469249_Look4TRs_A_de-novo_tool_for_detecting_simple_tandem_repeats_using_self-supervised_hidden_Markov_models/links/5c0b5117299bf139c746fadd/Look4TRs-A-de-novo-tool-for-detecting-simple-tandem-repeats-using-self-supervised-hidden-Markov-models.pdf	#VALUE!
0	K Stefanov, J Beskow, G Salvi	Self-Supervised Vision-Based Detection of the Active Speaker as a Prerequisite for Socially-Aware Language Acquisition	2017	arXiv preprint arXiv …	pdfs.semanticscholar.org	https://pdfs.semanticscholar.org/203c/e5b752ef11f1ced6dd4dcf5b4c0c852430b8.pdf	https://pdfs.semanticscholar.org/203c/e5b752ef11f1ced6dd4dcf5b4c0c852430b8.pdf
0	F de Chaumont Quitry, M Tagliasacchi…	Learning audio representations via phase prediction	2019	arXiv preprint arXiv …	adsabs.harvard.edu	http://adsabs.harvard.edu/abs/2019arXiv191011910D	http://adsabs.harvard.edu/abs/2019arXiv191011910D
0	S Kitagawa, K Wada, K Okada…	Learning-based Selective Dual-arm Grasping for Warehouse Picking	2018	人工知能学会全国大会論文 …	jstage.jst.go.jp	https://www.jstage.jst.go.jp/article/pjsai/JSAI2018/0/JSAI2018_1G303/_article/-char/ja/	https://www.jstage.jst.go.jp/article/pjsai/JSAI2018/0/JSAI2018_1G303/_article/-char/ja/
0	Q Delfosse, S Stark, D Tanneberg, VG Santucci…	Open-Ended Learning of Grasp Strategies using Intrinsically Motivated Self-Supervision		ai.rug.nl		https://www.ai.rug.nl/oel/papers/open_ended_grasping_OEL.pdf	https://www.ai.rug.nl/oel/papers/open_ended_grasping_OEL.pdf
0	E Arazo, NE O'Connor, K McGuinness	Improving unsupervised learning with exemplarCNNs	2019		doras.dcu.ie	http://doras.dcu.ie/23545/	http://doras.dcu.ie/23545/
0	M Patrick, YM Asano, R Fong, JF Henriques…	Multi-modal Self-Supervision from Generalized Data Transformations	2020	arXiv preprint arXiv …	arxiv.org	https://arxiv.org/abs/2003.04298	https://arxiv.org/abs/2003.04298
0	SY Hu, S Wang, WH Weng, JC Wang, XH Wang…	Weakly Supervised Context Encoder using DICOM metadata in Ultrasound Imaging	2020	arXiv preprint arXiv …	arxiv.org	https://arxiv.org/abs/2003.09070	https://arxiv.org/abs/2003.09070
0	M Nava, J Guzzi, RO Chavez-Garcia…	Learning to Perceive Long-Range Obstacles Using Self-Supervision from Short-Range Sensors	2019	Proceedings of the …	wvvw.aaai.org	https://wvvw.aaai.org/ojs/index.php/AAAI/article/view/5071	https://wvvw.aaai.org/ojs/index.php/AAAI/article/view/5071
0	D Babaev, I Kireev, N Ovsov, M Ivanova…	Event sequence metric learning	2020	arXiv preprint arXiv …	arxiv.org	https://arxiv.org/abs/2002.08232	https://arxiv.org/abs/2002.08232
0	A BURLACU	Overview of computer vision supervised learning techniques for low-data training	2019		repository.utm.md	http://repository.utm.md/handle/5014/5902	http://repository.utm.md/handle/5014/5902
0	P Munro	A FRAMEWORK FOR COMBINING UNSUPERVISED AND SUPERVISED LEARNING PROCEDURES		STATISTICS AND CLINICAL PRACTICE	ibib.waw.pl	http://ibib.waw.pl/images/ibib/grupy/MCB/Dokumenty/Seminaria2016/Lecture_notes_a4_DRUK1.pdf#page=68	http://ibib.waw.pl/images/ibib/grupy/MCB/Dokumenty/Seminaria2016/Lecture_notes_a4_DRUK1.pdf#page=68
0	T Suzuki, T Itazuri, K Hara…	Learning Spatiotemporal 3D Convolution with Video Order Self-supervision	2018	Proceedings of the …	openaccess.thecvf.com	http://openaccess.thecvf.com/content_eccv_2018_workshops/w12/html/Suzuki_Learning_Spatiotemporal_3D_Convolution_with_Video_Order_Self-Supervision_ECCVW_2018_paper.html	http://openaccess.thecvf.com/content_eccv_2018_workshops/w12/html/Suzuki_Learning_Spatiotemporal_3D_Convolution_with_Video_Order_Self-Supervision_ECCVW_2018_paper.html
0	A Zanfir, EG Bazavan, H Xu, B Freeman…	Weakly Supervised 3D Human Pose and Shape Reconstruction with Normalizing Flows	2020	arXiv preprint arXiv …	arxiv.org	https://arxiv.org/abs/2003.10350	https://arxiv.org/abs/2003.10350
0	S Lathuilière, S Tulyakov, E Ricci, N Sebe	Motion-supervised Co-Part Segmentation	2020	arXiv preprint arXiv …	arxiv.org	https://arxiv.org/abs/2004.03234	https://arxiv.org/abs/2004.03234
0	A Nagrani, JS Chung, S Albanie…	Disentangled Speech Embeddings using Cross-modal Self-supervision	2020	arXiv preprint arXiv …	arxiv.org	https://arxiv.org/abs/2002.08742	https://arxiv.org/abs/2002.08742
0	P Mahmoudieh	Self-Supervision for Reinforcement Learning	2017		eecs.berkeley.edu	https://www2.eecs.berkeley.edu/Pubs/TechRpts/2017/EECS-2017-51.pdf	https://www2.eecs.berkeley.edu/Pubs/TechRpts/2017/EECS-2017-51.pdf
0	FC Quitry, M Tagliasacchi, D Roblek	Learning audio representations via phase prediction	2019	arXiv preprint arXiv:1910.11910	arxiv.org	https://arxiv.org/abs/1910.11910	https://arxiv.org/abs/1910.11910
0	SN Aakur, S Sarkar	Action Localization through Continual Predictive Learning	2020	arXiv preprint arXiv:2003.12185	arxiv.org	https://arxiv.org/abs/2003.12185	https://arxiv.org/abs/2003.12185
0	JH Yoon, MG Park, Y Hwang…	Learning Depth from Endoscopic Images	2019	… Conference on 3D Vision …	ieeexplore.ieee.org	https://ieeexplore.ieee.org/abstract/document/8886115/	https://ieeexplore.ieee.org/abstract/document/8886115/
0	B Cheol Song, D Ha Kim	Metric-Based Regularization and Temporal Ensemble for Multi-Task Learning using Heterogeneous Unsupervised Tasks	2019	Proceedings of the IEEE …	openaccess.thecvf.com	http://openaccess.thecvf.com/content_ICCVW_2019/html/CEFRL/Song_Metric-Based_Regularization_and_Temporal_Ensemble_for_Multi-Task_Learning_using_Heterogeneous_ICCVW_2019_paper.html	http://openaccess.thecvf.com/content_ICCVW_2019/html/CEFRL/Song_Metric-Based_Regularization_and_Temporal_Ensemble_for_Multi-Task_Learning_using_Heterogeneous_ICCVW_2019_paper.html
0	A D'Innocente, S Bucci, T Tommasi…	Learning to Generalize One Sample at a Time with Self-Supervision	2019	arXiv preprint arXiv …	arxiv.org	https://arxiv.org/abs/1910.03915	https://arxiv.org/abs/1910.03915
0	A Kumar, AA Deshmukh, U Dogan, D Charles…	Data Transformation Insights in Self-supervision with Clustering Tasks	2020	arXiv preprint arXiv …	arxiv.org	https://arxiv.org/abs/2002.07384	https://arxiv.org/abs/2002.07384
0	DH Kim, SH Lee, BC Song	Metric-based Regularization and Temporal Ensemble for Multi-task Learning using Heterogeneous Unsupervised Tasks	2019	arXiv preprint arXiv:1908.11024	arxiv.org	https://arxiv.org/abs/1908.11024	https://arxiv.org/abs/1908.11024
0	K Han, SA Rebuffi, S Ehrhardt, A Vedaldi…	Automatically Discovering and Learning New Visual Categories with Ranking Statistics	2020	arXiv preprint arXiv …	arxiv.org	https://arxiv.org/abs/2002.05714	https://arxiv.org/abs/2002.05714
0	J Qiu, G Huang, TS Lee	A Model Cortical Network for Spatiotemporal Sequence Learning and Prediction	2018		openreview.net	https://openreview.net/forum?id=BJl_VnR9Km	https://openreview.net/forum?id=BJl_VnR9Km
0	P Tang, C Ramaiah, R Xu, C Xiong	Proposal Learning for Semi-Supervised Object Detection	2020	arXiv preprint arXiv:2001.05086	arxiv.org	https://arxiv.org/abs/2001.05086	https://arxiv.org/abs/2001.05086
0	HY Fish Tung, HW Tung, E Yumer, K Fragkiadaki	Self-supervised Learning of Motion Capture	2017	arXiv preprint arXiv:1712.01337
0	I Andreopoulos, A Chadha, Y Bi, A Abbas	Self-Supervised Learning From Compressed Spatio-Temporal Representations Of Data
0	T Ganegedara, L Ott, F Ramos	Learning to Navigate by Growing Deep Networks	2017	arXiv preprint arXiv:1712.05084	arxiv.org	https://arxiv.org/abs/1712.05084	https://arxiv.org/abs/1712.05084
0	F Juefei-Xu	Research Statement: Self-Supervised Learning in Unconstrained Periocular Face Recognition and Small Steps towards Statistically Efficient and …
0	V Schmidt, MN Sreedhar, M ElAraby, I Rish	Towards Lifelong Self-Supervision For Unpaired Image-to-Image Translation	2020	arXiv preprint arXiv …	arxiv.org	https://arxiv.org/abs/2004.00161	https://arxiv.org/abs/2004.00161
0	A Zhmoginov, I Fischer, M Sandler	Information-Bottleneck Approach to Self-Attention	2019		research.google	https://research.google/pubs/pub48435/	https://research.google/pubs/pub48435/
0	C Lee, H Seo, HJ Kim	Position-based monocular visual servoing of an unknown target using online self-supervised learning	2019	2019 IEEE/RSJ International …	ieeexplore.ieee.org	https://ieeexplore.ieee.org/abstract/document/8968216/	https://ieeexplore.ieee.org/abstract/document/8968216/
0	W Zhao, S Liu, Y Shu, YJ Liu	Towards Better Generalization: Joint Depth-Pose Learning without PoseNet	2020	arXiv preprint arXiv:2004.01314	arxiv.org	https://arxiv.org/abs/2004.01314	https://arxiv.org/abs/2004.01314
0	J Nixon, J Liu, D Berthelot	Semi-Supervised Class Discovery	2020	arXiv preprint arXiv:2002.03480	arxiv.org	https://arxiv.org/abs/2002.03480	https://arxiv.org/abs/2002.03480
0	J Van de Weijer	Learning Deep Networks from Unlabeled Data	2019	Book of abstracts	bsc.es	https://www.bsc.es/sites/default/files/public/u2416/bsc2018_public.pdf	https://www.bsc.es/sites/default/files/public/u2416/bsc2018_public.pdf
0	LG i Bigorda, Y Patel, M Rusiñol, D Karatzas…	Self-supervised learning of visual features through embedding images into text topic spaces.	2017	CoRR
0	A Wang, Z Fang, Y Gao, S Tan, S Wang…	Adversarial Learning for Joint Optimization of Depth and Ego-Motion	2020	… on Image Processing	ieeexplore.ieee.org	https://ieeexplore.ieee.org/abstract/document/8972902/	https://ieeexplore.ieee.org/abstract/document/8972902/
0	V Guizilini, J Li, R Ambrus, S Pillai, A Gaidon	Robust Semi-Supervised Monocular Depth Estimation with Reprojected Distances	2019	arXiv preprint arXiv …	arxiv.org	https://arxiv.org/abs/1910.01765	https://arxiv.org/abs/1910.01765
0	V Sharma, M Tapaswi, MS Sarfraz…	Clustering based Contrastive Learning for Improving Face Representations	2020	arXiv preprint arXiv …	arxiv.org	https://arxiv.org/abs/2004.02195	https://arxiv.org/abs/2004.02195
0	A Jansen, DPW Ellis, S Hershey, RC Moore…	Coincidence, Categorization, and Consolidation: Learning to Recognize Sounds with Minimal Supervision	2019	arXiv preprint arXiv …	arxiv.org	https://arxiv.org/abs/1911.05894	https://arxiv.org/abs/1911.05894
0	J Knuuttila	Automatic self-supervised learning of associations between speech and text	2015		aaltodoc2.org.aalto.fi	https://aaltodoc2.org.aalto.fi/handle/123456789/15755	https://aaltodoc2.org.aalto.fi/handle/123456789/15755
0	D Tomás Cardoso Rézio Martins	Fusion of stereo and monocular depth estimates in a self-supervised learning context	2017		repository.tudelft.nl	https://repository.tudelft.nl/islandora/object/uuid:faf5d4fb-5785-4d27-9d52-0b09214f3a6a	https://repository.tudelft.nl/islandora/object/uuid:faf5d4fb-5785-4d27-9d52-0b09214f3a6a
0	J Tao, J Xing, J Chen, C Zhang, S Fu	Hybrid Beamforming/Combining for Millimeter Wave MIMO: A Machine Learning Approach	2019	arXiv	ui.adsabs.harvard.edu	https://ui.adsabs.harvard.edu/abs/2019arXiv191006585T/abstract	https://ui.adsabs.harvard.edu/abs/2019arXiv191006585T/abstract
0	X Cui, M Liao, P Lv, C Zheng	Sequencing the musical sections with deep learning	2019	2019 International Joint …	ieeexplore.ieee.org	https://ieeexplore.ieee.org/abstract/document/8851935/	https://ieeexplore.ieee.org/abstract/document/8851935/
0	X Cao, BC Chen, SN Lim	Unsupervised Deep Metric Learning via Auxiliary Rotation Loss	2019	arXiv preprint arXiv:1911.07072	arxiv.org	https://arxiv.org/abs/1911.07072	https://arxiv.org/abs/1911.07072
0	AJ Piergiovanni, A Angelova, MS Ryoo	Evolving Losses for Unsupervised Video Representation Learning	2020	arXiv preprint arXiv:2002.12177	arxiv.org	https://arxiv.org/abs/2002.12177	https://arxiv.org/abs/2002.12177
0	A Babadi, K Naderi, P Hämäläinen	Self-Imitation Learning of Locomotion Movements through Termination Curriculum	2019	Motion, Interaction and Games	dl.acm.org	https://dl.acm.org/doi/abs/10.1145/3359566.3360072	https://dl.acm.org/doi/abs/10.1145/3359566.3360072
0	F de La Bourdonnaye, C Teulière…	Within Reach? Learning to touch objects without prior models	2019	2019 Joint IEEE 9th …	ieeexplore.ieee.org	https://ieeexplore.ieee.org/abstract/document/8850702/	https://ieeexplore.ieee.org/abstract/document/8850702/
0	M Hang, J Neville, B Ribeiro	A Collective Learning Framework to Boost GNN Expressiveness	2020	arXiv preprint arXiv:2003.12169	arxiv.org	https://arxiv.org/abs/2003.12169	https://arxiv.org/abs/2003.12169
0	H Zhang, PHS Torr, P Koniusz	Few-shot Learning with Multi-scale Self-supervision	2020	arXiv preprint arXiv:2001.01600	arxiv.org	https://arxiv.org/abs/2001.01600	https://arxiv.org/abs/2001.01600
0	D Ruiter, C España-Bonet, J van Genabith	Self-Induced Curriculum Learning in Neural Machine Translation	2020	arXiv preprint arXiv …	arxiv.org	https://arxiv.org/abs/2004.03151	https://arxiv.org/abs/2004.03151
0	R Karlsson, E Sjoberg	Learning a Directional Soft Lane Affordance Model for Road Scenes Using Self-Supervision	2020	arXiv preprint arXiv:2002.11477	arxiv.org	https://arxiv.org/abs/2002.11477	https://arxiv.org/abs/2002.11477
0	WK Vong, BM Lake	Learning word-referent mappings and concepts from raw inputs	2020	arXiv preprint arXiv:2003.05573	arxiv.org	https://arxiv.org/abs/2003.05573	https://arxiv.org/abs/2003.05573
0	J Zhang, L Liu, P Wang, C Shen	To Balance or Not to Balance: A Simple-yet-Effective Approach for Learning with Long-Tailed Distributions	2019	arXiv	ui.adsabs.harvard.edu	https://ui.adsabs.harvard.edu/abs/2019arXiv191204486Z/abstract	https://ui.adsabs.harvard.edu/abs/2019arXiv191204486Z/abstract
0	H Zhang, L Zhang, X Qi, H Li, PHS Torr…	Few-shot Action Recognition via Improved Attention with Self-supervision	2020	arXiv preprint arXiv …	arxiv.org	https://arxiv.org/abs/2001.03905	https://arxiv.org/abs/2001.03905
0	RSCBF Anoop, CS Gould	DeepPermNet: Visual Permutation Learning		learning	rfsantacruz.com	https://rfsantacruz.com/files/pdfs/cvpr17_DeepPermNet.pdf	https://rfsantacruz.com/files/pdfs/cvpr17_DeepPermNet.pdf
0	M Dimiccoli, H Wendt	Learning event representations in image sequences by dynamic graph embedding	2019	arXiv preprint arXiv:1910.03483	arxiv.org	https://arxiv.org/abs/1910.03483	https://arxiv.org/abs/1910.03483
0	D Fourches	Inductive Transfer Learning for Molecular Activity	2019		chemrxiv.org	https://chemrxiv.org/ndownloader/articles/9978743/versions/1/export_pdf	https://chemrxiv.org/ndownloader/articles/9978743/versions/1/export_pdf
0	KN Haque, S Latif, R Rana	Disentangled Representation Learning with Information Maximizing Autoencoder	2019	arXiv preprint arXiv:1904.08613	arxiv.org	https://arxiv.org/abs/1904.08613	https://arxiv.org/abs/1904.08613
0	J Zhang, L Liu, P Wang, C Shen	To Balance or Not to Balance: An Embarrassingly Simple Approach for Learning with Long-Tailed Distributions	2019	arXiv preprint arXiv:1912.04486	arxiv.org	https://arxiv.org/abs/1912.04486	https://arxiv.org/abs/1912.04486
0	B Quartey	Autonomous self-driving vehicle: Perception, supervised learning, control.	2018		air.ashesi.edu.gh	https://air.ashesi.edu.gh/handle/20.500.11988/412	https://air.ashesi.edu.gh/handle/20.500.11988/412
0	Z Zhang, J Qiao, S Lin	A Semi-Supervised Monocular Stereo Matching Method	2019	Symmetry	mdpi.com	https://www.mdpi.com/2073-8994/11/5/690	https://www.mdpi.com/2073-8994/11/5/690
0	DK Pal, S Nallamothu, M Savvides	Towards a Hypothesis on Visual Transformation based Self-Supervision	2019	arXiv preprint arXiv:1911.10594	arxiv.org	https://arxiv.org/abs/1911.10594	https://arxiv.org/abs/1911.10594
0	N Asadi, M Hosseinzadeh, M Eftekhari	Towards Shape Biased Unsupervised Representation Learning for Domain Generalization	2019	arXiv preprint arXiv:1909.08245	arxiv.org	https://arxiv.org/abs/1909.08245	https://arxiv.org/abs/1909.08245
0	F Juefei-Xu	Self-Supervised Predictive Learning in Unconstrained Periocular Face Recognition	2018
0	PDH Nguyen, M Hoffmann, U Pattacini, G Metta	Learning peripersonal space in a humanoid robot and its application to safe human-robot interaction		socrates-project.eu		http://www.socrates-project.eu/internal-documents/SSR_2018/SSR_2018_paper_8.pdf	http://www.socrates-project.eu/internal-documents/SSR_2018/SSR_2018_paper_8.pdf
0	G Zhu, J Wang, ZZ Ren, C Zhang	Object-Oriented Model Learning through Multi-Level Abstraction	2018		openreview.net	https://openreview.net/forum?id=BkxkH30cFm	https://openreview.net/forum?id=BkxkH30cFm
0	M Torop, S Kothapalli, Y Sun, J Liu, S Kahali…	Deep learning using a biophysical model for Robust and Accelerated Reconstruction (RoAR) of quantitative and artifact-free R2* images	2019	arXiv preprint arXiv …	arxiv.org	https://arxiv.org/abs/1912.07087	https://arxiv.org/abs/1912.07087
0	K Meshgi, MS Mirzaei, S Oba	Long and Short Memory Balancing in Visual Co-Tracking Using Q-Learning	2019	2019 IEEE International …	ieeexplore.ieee.org	https://ieeexplore.ieee.org/abstract/document/8803577/	https://ieeexplore.ieee.org/abstract/document/8803577/
0	J Hoffman	Learning to Adapt Across Domains		people.eecs.berkeley.edu		http://people.eecs.berkeley.edu/~jhoffman/docs/research-statement.pdf	http://people.eecs.berkeley.edu/~jhoffman/docs/research-statement.pdf
0	L Jing, T Parag, Z Wu, Y Tian, H Wang	VideoSSL: Semi-Supervised Learning for Video Classification	2020	arXiv preprint arXiv:2003.00197	arxiv.org	https://arxiv.org/abs/2003.00197	https://arxiv.org/abs/2003.00197
0	Y Utsumi, K Nakamura, M Iwamura, K Kise	DNN-Based Tiller Number Estimation for Coping with Shortage of Labeled Data		pdfs.semanticscholar.org		https://pdfs.semanticscholar.org/4153/d54acd2e8d1d9e9fc818ab4fa903afb98b82.pdf	https://pdfs.semanticscholar.org/4153/d54acd2e8d1d9e9fc818ab4fa903afb98b82.pdf
0	P Layam, V Sarma	A Survey of Deep Learning Techniques for Mobile Robot Applications	2014		pdfs.semanticscholar.org	https://pdfs.semanticscholar.org/258b/203c77c1d78a8153c4308d6292eae03510a8.pdf	https://pdfs.semanticscholar.org/258b/203c77c1d78a8153c4308d6292eae03510a8.pdf
0	T Manderson, S Wapnick, D Meger…	Learning to Drive Off Road on Smooth Terrain in Unstructured Environments Using an On-Board Camera and Sparse Aerial Images	2020	arXiv preprint arXiv …	arxiv.org	https://arxiv.org/abs/2004.04697	https://arxiv.org/abs/2004.04697
0	S Park, J Yoo, D Cho, J Kim, TH Kim	Fast Adaptation to Super-Resolution Networks via Meta-Learning	2020	arXiv preprint arXiv:2001.02905	arxiv.org	https://arxiv.org/abs/2001.02905	https://arxiv.org/abs/2001.02905
0	C Zhuang, X Ding, D Murli, D Yamins	Local Label Propagation for Large-Scale Semi-Supervised Learning	2019	arXiv preprint arXiv:1905.11581	arxiv.org	https://arxiv.org/abs/1905.11581	https://arxiv.org/abs/1905.11581
0	JA Crowder, J Carbone, S Friess	Methodologies for Continuous, Life-Long Machine Learning for AI Systems	2020	Artificial Psychology	Springer	https://link.springer.com/chapter/10.1007/978-3-030-17081-3_11	https://link.springer.com/chapter/10.1007/978-3-030-17081-3_11
0	L Schmarje, M Santarossa, SM Schröder…	A survey on Semi-, Self-and Unsupervised Techniques in Image Classification	2020	arXiv preprint arXiv …	arxiv.org	https://arxiv.org/abs/2002.08721	https://arxiv.org/abs/2002.08721
0	D Zadok, D McDuff, A Kapoor	Affect-based Intrinsic Rewards for Learning General Representations	2019	arXiv preprint arXiv:1912.00403	arxiv.org	https://arxiv.org/abs/1912.00403	https://arxiv.org/abs/1912.00403
0	W Qi, RT Mullapudi, S Gupta, D Ramanan	Learning to Move with Affordance Maps	2020	arXiv preprint arXiv …	arxiv.org	https://arxiv.org/abs/2001.02364	https://arxiv.org/abs/2001.02364
0	M Planamente, A Bottino, B Caputo	Joint Encoding of Appearance and Motion Features with Self-supervision for First Person Action Recognition	2020	arXiv preprint arXiv:2002.03982	arxiv.org	https://arxiv.org/abs/2002.03982	https://arxiv.org/abs/2002.03982
0	K Kim, BT Zhang	Learning with target classification auxiliary task for semantic navigation		pdfs.semanticscholar.org		https://pdfs.semanticscholar.org/ddf2/d3dfb9d3aca14e7d66c650399b0069d7aa88.pdf	https://pdfs.semanticscholar.org/ddf2/d3dfb9d3aca14e7d66c650399b0069d7aa88.pdf
0	AZSSM Nießner, M Fisher, JXT Funkhouser	3DMatch: Learning Local Geometric Descriptors from RGB-D Reconstructions		vision.cs.princeton.edu		https://vision.cs.princeton.edu/projects/2016/3DMatch/paper_v2.pdf	https://vision.cs.princeton.edu/projects/2016/3DMatch/paper_v2.pdf
0	J Schmidhuber	Learning Algorithms for Networks with Internal and External	2014	Connectionist Models: Proceedings of the 1990 …	books.google.com	https://books.google.com/books?hl=en&lr=&id=_Z6jBQAAQBAJ&oi=fnd&pg=PA52&dq=%22self-supervised+learning%22&ots=xt2Onak9Uh&sig=XFxsnl6_ABUe2mhZo6Fn_OxZxuc	https://books.google.com/books?hl=en&lr=&id=_Z6jBQAAQBAJ&oi=fnd&pg=PA52&dq=%22self-supervised+learning%22&ots=xt2Onak9Uh&sig=XFxsnl6_ABUe2mhZo6Fn_OxZxuc
0	G Riegler, Y Liao, S Donne…	Connecting the Dots: Learning Representations for Active Monocular Depth Estimation	2019	Proceedings of the …	openaccess.thecvf.com	http://openaccess.thecvf.com/content_CVPR_2019/html/Riegler_Connecting_the_Dots_Learning_Representations_for_Active_Monocular_Depth_Estimation_CVPR_2019_paper.html	http://openaccess.thecvf.com/content_CVPR_2019/html/Riegler_Connecting_the_Dots_Learning_Representations_for_Active_Monocular_Depth_Estimation_CVPR_2019_paper.html
0	M Blendowski, H Nikisch, MP Heinrich	Self-Supervised Convolutional Feature Training for Medical Volume Scans	2018
0	G Chen, L Pan, Y Chen, P Xu, Z Wang, P Wu…	Robot Navigation with Map-Based Deep Reinforcement Learning	2020	arXiv preprint arXiv …	arxiv.org	https://arxiv.org/abs/2002.04349	https://arxiv.org/abs/2002.04349
0	X Wang, Q Huang, A Celikyilmaz, J Gao…	Vision-Language Navigation Policy Learning and Adaptation	2020	… on Pattern Analysis …	ieeexplore.ieee.org	https://ieeexplore.ieee.org/abstract/document/8986691/	https://ieeexplore.ieee.org/abstract/document/8986691/
0	IY Ha, MP Heinrich	Comparing Deep Learning Strategies and Attention Mechanisms of Discrete Registration for Multimodal Image-Guided Interventions	2019	Large-Scale Annotation of Biomedical Data and …	Springer	https://link.springer.com/chapter/10.1007/978-3-030-33642-4_16	https://link.springer.com/chapter/10.1007/978-3-030-33642-4_16
0	L Monorchio, D Evangelista, M Imperoli, A Pretto	Learning from Successes and Failures to Grasp Objects with a Vacuum Gripper		pdfs.semanticscholar.org		https://pdfs.semanticscholar.org/9964/cf8183c43febb0963afea3e56e656a6edd4d.pdf	https://pdfs.semanticscholar.org/9964/cf8183c43febb0963afea3e56e656a6edd4d.pdf
0	L Berscheid, P Meißner, T Kröger	Robot Learning of Shifting Objects for Grasping in Cluttered Environments	2019	arXiv preprint arXiv:1907.11035	arxiv.org	https://arxiv.org/abs/1907.11035	https://arxiv.org/abs/1907.11035
0	J Xu	Task driven autonomous robot navigation with imitation learning and sensor fusion	2018		cardinalscholar.bsu.edu	http://cardinalscholar.bsu.edu/handle/123456789/201154	http://cardinalscholar.bsu.edu/handle/123456789/201154
0	JW Soh, S Cho, NI Cho	Meta-Transfer Learning for Zero-Shot Super-Resolution	2020	arXiv preprint arXiv:2002.12213	arxiv.org	https://arxiv.org/abs/2002.12213	https://arxiv.org/abs/2002.12213
0	S Katoch, K Thopalli, JJ Thiagarajan, P Turaga…	Invenio: Discovering Hidden Relationships Between Tasks/Domains Using Structured Meta Learning	2019	arXiv preprint arXiv …	arxiv.org	https://arxiv.org/abs/1911.10600	https://arxiv.org/abs/1911.10600
0	J Qiu, G Huang, TS Lee	Visual Sequence Learning in Hierarchical Prediction Networks and Primate Visual Cortex	2019	Advances in Neural Information Processing …	papers.nips.cc	http://papers.nips.cc/paper/8534-visual-sequence-learning-in-hierarchical-prediction-networks-and-primate-visual-cortex.pdf	http://papers.nips.cc/paper/8534-visual-sequence-learning-in-hierarchical-prediction-networks-and-primate-visual-cortex.pdf
0	A Elnaggar, M Heinzinger, C Dallago, B Rost	End-to-end multitask learning, from protein language to protein features without alignments	2019	bioRxiv	biorxiv.org	https://www.biorxiv.org/content/10.1101/864405v1.abstract	https://www.biorxiv.org/content/10.1101/864405v1.abstract
0	N Rethmeier, B Plank	MoRTy: Unsupervised Learning of Task-specialized Word Embeddings by Autoencoding	2019	Proceedings of the 4th Workshop on …	aclweb.org	https://www.aclweb.org/anthology/W19-4307.pdf	https://www.aclweb.org/anthology/W19-4307.pdf
0	G Reina, A Milella, J Underwood	A Self-Learning Ground Classifier Using Radar Features	2014	Field and Service Robotics	Springer	https://link.springer.com/chapter/10.1007/978-3-642-40686-7_42	https://link.springer.com/chapter/10.1007/978-3-642-40686-7_42
0	L Chan, MS Hosseini, KN Plataniotis	A Comprehensive Analysis of Weakly-Supervised Semantic Segmentation in Different Image Domains	2019	arXiv preprint arXiv:1912.11186	arxiv.org	https://arxiv.org/abs/1912.11186	https://arxiv.org/abs/1912.11186
0	C Lynch, M Khansari, T Xiao, V Kumar, J Tompson…	LEARNING LATENT PLANS FROM PLAY DATA		tarl2019.github.io		https://tarl2019.github.io/assets/papers/lynch2019learning.pdf	https://tarl2019.github.io/assets/papers/lynch2019learning.pdf
0	E Shelhamer, P Mahmoudieh, M Argus, T Darrell	SELF-SUPERVISION FOR REINFORCEMENT LEARNING	2016	arXiv preprint arXiv:1612.07307
0	OS Jagtap	Socio-inspired Optimization-Cohort Intelligence Algorithm		vjer.in		http://www.vjer.in/vol2issue1/vjer020107.PDF	http://www.vjer.in/vol2issue1/vjer020107.PDF
0	O Ciga, AL Martel	Learning to segment images with classification labels	2019	arXiv preprint arXiv:1912.12533	arxiv.org	https://arxiv.org/abs/1912.12533	https://arxiv.org/abs/1912.12533
0	S Tang, VR de Sa	Improving Sentence Representations with Consensus Maximisation	2018	arXiv preprint arXiv:1810.01064	arxiv.org	https://arxiv.org/abs/1810.01064	https://arxiv.org/abs/1810.01064
0	AR Feyjie, R Azad, M Pedersoli, C Kauffman…	Semi-supervised few-shot learning for medical image segmentation	2020	arXiv preprint arXiv …	arxiv.org	https://arxiv.org/abs/2003.08462	https://arxiv.org/abs/2003.08462
0	H Lv, J Cao, Q Dai, G Liang…	Noise-Contrastive Estimation Based on Relative Neighbour Sampling for Unsupervised Image Embedding Learning	2019	2019 IEEE 4th …	ieeexplore.ieee.org	https://ieeexplore.ieee.org/abstract/document/8713206/	https://ieeexplore.ieee.org/abstract/document/8713206/
0	A Ali	Spatiotemporal Representation Learning For Human Action Recognition And Localization	2019		atrium.lib.uoguelph.ca	https://atrium.lib.uoguelph.ca/xmlui/handle/10214/17417	https://atrium.lib.uoguelph.ca/xmlui/handle/10214/17417
0	W Zuo, L Lin, AL Yuille, H Bischof…	Guest Editorial Introduction to the Special Issue on Large Scale and Nonlinear Similarity Learning for Intelligent Video Analysis	2018	IEEE Transactions on …	ieeexplore.ieee.org	https://ieeexplore.ieee.org/abstract/document/8482249/	https://ieeexplore.ieee.org/abstract/document/8482249/
0	B Hong, C Jin, N Wang, Y Li…	The application of transfer learning for scene recognition	2019	… Conference on Image …	spiedigitallibrary.org	https://www.spiedigitallibrary.org/conference-proceedings-of-spie/11321/1132107/The-application-of-transfer-learning-for-scene-recognition/10.1117/12.2538683.short	https://www.spiedigitallibrary.org/conference-proceedings-of-spie/11321/1132107/The-application-of-transfer-learning-for-scene-recognition/10.1117/12.2538683.short
0	L Zhou, M Kaess	Windowed Bundle Adjustment Framework for Unsupervised Learning of Monocular Depth Estimation With U-Net Extension and Clip Loss	2020	IEEE Robotics and Automation Letters	ieeexplore.ieee.org	https://ieeexplore.ieee.org/abstract/document/9013050/	https://ieeexplore.ieee.org/abstract/document/9013050/
0	J Jiao, L Bao, Y Wei, S He, H Shi, R Lau…	Laplacian Denoising Autoencoder	2020	arXiv preprint arXiv …	arxiv.org	https://arxiv.org/abs/2003.13623	https://arxiv.org/abs/2003.13623
0	T Kim, Y Park, Y Park, IH Suh	Acceleration of Actor-Critic Deep Reinforcement Learning for Visual Grasping in Clutter by State Representation Learning Based on Disentanglement of a Raw Input …	2020	arXiv preprint arXiv:2002.11903	arxiv.org	https://arxiv.org/abs/2002.11903	https://arxiv.org/abs/2002.11903
0	L Zhang, Y Li, H Chen, L Cheng	Mammographic Mass Detection by Bilateral Analysis Based on Convolution Neural Network	2019	2019 IEEE International …	ieeexplore.ieee.org	https://ieeexplore.ieee.org/abstract/document/8803761/	https://ieeexplore.ieee.org/abstract/document/8803761/
0	N Denis	On mechanisms for transfer using landmark value functions in multi-task lifelong reinforcement learning	2019	arXiv preprint arXiv:1907.00884	arxiv.org	https://arxiv.org/abs/1907.00884	https://arxiv.org/abs/1907.00884
0	DS Brown, R Coleman, R Srinivasan…	Safe Imitation Learning via Fast Bayesian Reward Inference from Preferences	2020	arXiv preprint arXiv …	arxiv.org	https://arxiv.org/abs/2002.09089	https://arxiv.org/abs/2002.09089
0	S Pontes-Filho, S Nichele	Towards a framework for the evolution of artificial general intelligence	2019	arXiv preprint arXiv:1903.10410	arxiv.org	https://arxiv.org/abs/1903.10410	https://arxiv.org/abs/1903.10410
0	D Arpit, H Wang, C Xiong, R Socher…	Neural Bayes: A Generic Parameterization Method for Unsupervised Representation Learning	2020	arXiv preprint arXiv …	arxiv.org	https://arxiv.org/abs/2002.09046	https://arxiv.org/abs/2002.09046
0	M Gadelha, A RoyChowdhury, G Sharma…	Label-Efficient Learning on Point Clouds using Approximate Convex Decompositions	2020	arXiv preprint arXiv …	arxiv.org	https://arxiv.org/abs/2003.13834	https://arxiv.org/abs/2003.13834
0	M KOCABA	2D/3D human pose estimation using deep convolutional neural nets	2019		etd.lib.metu.edu.tr	http://etd.lib.metu.edu.tr/upload/12622955/index.pdf	http://etd.lib.metu.edu.tr/upload/12622955/index.pdf
0	V Stojnić, V Risojević	Analysis of Color Space Quantization in Split-Brain Autoencoder for Remote Sensing Image Classification	2018	2018 14th Symposium on Neural …	ieeexplore.ieee.org	https://ieeexplore.ieee.org/abstract/document/8587001/	https://ieeexplore.ieee.org/abstract/document/8587001/
0	J O'Neill, D Bollegala	Meta-Embedding as Auxiliary Task Regularization		danushka.net		http://danushka.net/papers/james-ecai-2020.pdf	http://danushka.net/papers/james-ecai-2020.pdf
0	R Relyea, D Bhanushali, K Manghi, A Vashist…	Improving multimodal localization through self-supervision		ingentaconnect.com		https://www.ingentaconnect.com/content/ist/ei/pre-prints/content-ei2020-iriacv-014	https://www.ingentaconnect.com/content/ist/ei/pre-prints/content-ei2020-iriacv-014
0	C Lee, A Kosta, AZ Zhu, K Chaney, K Daniilidis…	Spike-FlowNet: Event-based Optical Flow Estimation with Energy-Efficient Hybrid Neural Networks	2020	arXiv preprint arXiv …	arxiv.org	https://arxiv.org/abs/2003.06696	https://arxiv.org/abs/2003.06696
0	D Liang, R Kreiser, C Nielsen, N Qiao…	Neural State Machines for Robust Learning and Control of Neuromorphic Agents	2019	IEEE Journal on …	ieeexplore.ieee.org	https://ieeexplore.ieee.org/abstract/document/8890932/	https://ieeexplore.ieee.org/abstract/document/8890932/
0	JH Park, J Kim, Y Jang, I Jang…	Learning Transformable and Plannable se (3) Features for Scene Imitation of a Mobile Service Robot	2020	IEEE Robotics and …	ieeexplore.ieee.org	https://ieeexplore.ieee.org/abstract/document/8966467/	https://ieeexplore.ieee.org/abstract/document/8966467/
0	BJ Kröger, T Bekolay	Speech Acquisition	2019	Neural Modeling of Speech Processing and …	Springer	https://link.springer.com/chapter/10.1007/978-3-030-15853-8_4	https://link.springer.com/chapter/10.1007/978-3-030-15853-8_4
0	J Tao, J Xing, J Chen, C Zhang…	Deep Neural Hybrid Beamforming for Multi-User mmWave Massive MIMO System	2019	2019 IEEE Global …	ieeexplore.ieee.org	https://ieeexplore.ieee.org/abstract/document/8969154/	https://ieeexplore.ieee.org/abstract/document/8969154/
0	S Ling, Y Liu, J Salazar, K Kirchhoff	Deep Contextualized Acoustic Representations For Semi-Supervised Speech Recognition	2019	arXiv preprint arXiv:1912.01679	arxiv.org	https://arxiv.org/abs/1912.01679	https://arxiv.org/abs/1912.01679
0	MKR Sieb	Visual Imitation Learning for Robot Manipulation	2019		pdfs.semanticscholar.org	https://pdfs.semanticscholar.org/72a4/9660561810cd9362ab5a3e7eb6e5882ea797.pdf	https://pdfs.semanticscholar.org/72a4/9660561810cd9362ab5a3e7eb6e5882ea797.pdf
0	S Savin, S Golousov, M Ivanov…	Numerical Optimisation-Based Control Pipeline for Robot Arm for Machine Learning Experiments	2019	2019 International …	ieeexplore.ieee.org	https://ieeexplore.ieee.org/abstract/document/8867612/	https://ieeexplore.ieee.org/abstract/document/8867612/
0	H Kihlström	Active Stereo Reconstruction using Deep Learning	2019		diva-portal.org	http://www.diva-portal.org/smash/record.jsf?pid=diva2:1332305	http://www.diva-portal.org/smash/record.jsf?pid=diva2:1332305
0	H Duan, Y Zhao, Y Xiong, W Liu, D Lin	Omni-sourced Webly-supervised Learning for Video Recognition	2020	arXiv preprint arXiv:2003.13042	arxiv.org	https://arxiv.org/abs/2003.13042	https://arxiv.org/abs/2003.13042
0	L Zhao, H Bai, A Wang, Y Zhao	Deep Optimized Multiple Description Image Coding via Scalar Quantization Learning	2020	arXiv preprint arXiv:2001.03851	arxiv.org	https://arxiv.org/abs/2001.03851	https://arxiv.org/abs/2001.03851
0	W Yan, A Sharma, RT Tan	Optical Flow in Dense Foggy Scenes using Semi-Supervised Learning	2020	arXiv preprint arXiv:2004.01905	arxiv.org	https://arxiv.org/abs/2004.01905	https://arxiv.org/abs/2004.01905
0	G Kahn	Adam Villaflor	2014	University of California, Berkeley	avillaflor.github.io	https://avillaflor.github.io/papers/avillaflor_resume.pdf	https://avillaflor.github.io/papers/avillaflor_resume.pdf
0	W Yu, Y Lu, S Easterbrook, S Fidler	EFFICIENT AND INFORMATION-PRESERVING FUTURE FRAME PREDICTION AND BEYOND		csri.utoronto.ca		http://www.csri.utoronto.ca/~sme/papers/2020/efficient_and_information_preserving_future_frame_prediction_and_beyond.pdf	http://www.csri.utoronto.ca/~sme/papers/2020/efficient_and_information_preserving_future_frame_prediction_and_beyond.pdf
0	S Park, WK Chung, K Kim	Training-Free Bayesian Self-Adaptive Classification for sEMG Pattern Recognition Including Motion Transition	2019	IEEE Transactions on Biomedical …	ieeexplore.ieee.org	https://ieeexplore.ieee.org/abstract/document/8867968/	https://ieeexplore.ieee.org/abstract/document/8867968/
0	Z Zhou, J Liang	The Kidney Tumor Segmentation Challenge KiTS 2019
0	G French, A Oliver, T Salimans	Milking CowMask for Semi-Supervised Image Classification	2020	arXiv preprint arXiv:2003.12022	arxiv.org	https://arxiv.org/abs/2003.12022	https://arxiv.org/abs/2003.12022
0	J HILDEBRANDT	The Sound of Pixels		pdfs.semanticscholar.org		https://pdfs.semanticscholar.org/5bfb/e04b2afa1bc68351baaaba17221c0d0ed674.pdf	https://pdfs.semanticscholar.org/5bfb/e04b2afa1bc68351baaaba17221c0d0ed674.pdf
0	DR Chittajallu, B Dong, P Tunison…	XAI-CBIR: Explainable AI System for Content based Retrieval of Video Frames from Minimally Invasive Surgery Videos	2019	2019 IEEE 16th …	ieeexplore.ieee.org	https://ieeexplore.ieee.org/abstract/document/8759428/	https://ieeexplore.ieee.org/abstract/document/8759428/
0	C Sital, T Brosch, D Tio, A Raaijmakers…	3D medical image segmentation with labeled and unlabeled data using autoencoders at the example of liver segmentation in CT images	2020	arXiv preprint arXiv …	arxiv.org	https://arxiv.org/abs/2003.07923	https://arxiv.org/abs/2003.07923
0	C Ye	Learning of Dense Optical Flow, Motion and Depth, from Sparse Event Cameras	2019		drum.lib.umd.edu	https://drum.lib.umd.edu/handle/1903/25034	https://drum.lib.umd.edu/handle/1903/25034
0	K Gupta, S Singh, A Shrivastava	PatchVAE: Learning Local Latent Codes for Recognition	2020	arXiv preprint arXiv:2004.03623	arxiv.org	https://arxiv.org/abs/2004.03623	https://arxiv.org/abs/2004.03623
0	D Kim, D Cho, IS Kweon	Can Spatiotemporal 3D CNNs Retrace the History of 2D CNNs and ImageNet? Kensho Hara, Hirokatsu Kataoka, Yutaka Satoh National Institute of Advanced …		pdfs.semanticscholar.org		https://pdfs.semanticscholar.org/d716/435f0cb0cac56237f74b1ced940aabce6a2b.pdf	https://pdfs.semanticscholar.org/d716/435f0cb0cac56237f74b1ced940aabce6a2b.pdf
0	MT Mason	Learning Accurate Objectness Instance Segmentation from Photorealistic Rendering for Robotic Manipulation	2020	Proceedings of the 2018 International Symposium …	books.google.com	https://books.google.com/books?hl=en&lr=&id=98LLDwAAQBAJ&oi=fnd&pg=PA245&dq=%22self-supervised+learning%22&ots=H7fhOxguPt&sig=Wwb6m93ogbWEwunYgL5dlI4YMHk	https://books.google.com/books?hl=en&lr=&id=98LLDwAAQBAJ&oi=fnd&pg=PA245&dq=%22self-supervised+learning%22&ots=H7fhOxguPt&sig=Wwb6m93ogbWEwunYgL5dlI4YMHk
0	A Tejankar, H Pirsiavash	A simple baseline for domain adaptation using rotation prediction	2019	arXiv preprint arXiv:1912.11903	arxiv.org	https://arxiv.org/abs/1912.11903	https://arxiv.org/abs/1912.11903
0	HW Cheng, TL Chen, CH Tien	Learning-based risk assessment and motion estimation by vision for unmanned aerial vehicle landing in an unvisited area	2019	Journal of Electronic Imaging	spiedigitallibrary.org	https://www.spiedigitallibrary.org/journals/Journal-of-Electronic-Imaging/volume-28/issue-6/063011/Learning-based-risk-assessment-and-motion-estimation-by-vision-for/10.1117/1.JEI.28.6.063011.short	https://www.spiedigitallibrary.org/journals/Journal-of-Electronic-Imaging/volume-28/issue-6/063011/Learning-based-risk-assessment-and-motion-estimation-by-vision-for/10.1117/1.JEI.28.6.063011.short
0	S Li, J Zhou, Z Jia, DY Yeung, MT Mason	Learning Accurate Objectness Instance Segmentation from Photorealistic Rendering for Robotic Manipulation	2018	International Symposium on …	Springer	https://link.springer.com/chapter/10.1007/978-3-030-33950-0_22	https://link.springer.com/chapter/10.1007/978-3-030-33950-0_22
0	S Lee, D Cho, J Kim, TH Kim	Restore from Restored: Single Image Denoising with Pseudo Clean Image	2020	arXiv preprint arXiv:2003.04721	arxiv.org	https://arxiv.org/abs/2003.04721	https://arxiv.org/abs/2003.04721
0	E Panagiota Mastoropoulou	Enhancing Deep Active Learning Using Selective Self-Training For Image Classification	2019		diva-portal.org	http://www.diva-portal.org/smash/record.jsf?pid=diva2:1414329	http://www.diva-portal.org/smash/record.jsf?pid=diva2:1414329
0	J Robinson, S Jegelka, S Sra	Strength from Weakness: Fast Learning Using Weak Supervision	2020	arXiv preprint arXiv:2002.08483	arxiv.org	https://arxiv.org/abs/2002.08483	https://arxiv.org/abs/2002.08483
0	G LORRE, J Rabarisoa, A Orcesi…	Temporal Contrastive Pretraining for Video Action Recognition	2020	The IEEE Winter …	openaccess.thecvf.com	http://openaccess.thecvf.com/content_WACV_2020/html/LORRE_Temporal_Contrastive_Pretraining_for_Video_Action_Recognition_WACV_2020_paper.html	http://openaccess.thecvf.com/content_WACV_2020/html/LORRE_Temporal_Contrastive_Pretraining_for_Video_Action_Recognition_WACV_2020_paper.html
0	L Bergman, N Cohen, Y Hoshen	Deep Nearest Neighbor Anomaly Detection	2020	arXiv preprint arXiv:2002.10445	arxiv.org	https://arxiv.org/abs/2002.10445	https://arxiv.org/abs/2002.10445
0	A Fenneteau, P Bourdon, D Helbert…	Learning a CNN on multiple sclerosis lesion segmentation with self-supervision	2020	3D Measurement …	hal.archives-ouvertes.fr	https://hal.archives-ouvertes.fr/hal-02378210/document	https://hal.archives-ouvertes.fr/hal-02378210/document
0	Z Zhou, S Zhang, Z Huang	Dynamic Self-training Framework for Graph Convolutional Networks	2019	arXiv preprint arXiv:1910.02684	arxiv.org	https://arxiv.org/abs/1910.02684	https://arxiv.org/abs/1910.02684
0	C Lirong, G Qingfeng, Z Renguang…	A Spatially Constrained Multi-autoencoder Approach for Multivariate Geochemical Anomaly Recognition	2017	AGU Fall Meeting …	adsabs.harvard.edu	http://adsabs.harvard.edu/abs/2017AGUFMIN43D0107L	http://adsabs.harvard.edu/abs/2017AGUFMIN43D0107L
0	X Zhan, J Xie, Z Liu, YS Ong, CC Loy	Collaborative Online Deep Clustering for Unsupervised Representation Learning
0	Z Sun, S Zhao	A Comparative Analysis of Three Supervised Learning Algorithms in Stock Selection		iopscience.iop.org		https://iopscience.iop.org/article/10.1088/1742-6596/1453/1/012001/meta	https://iopscience.iop.org/article/10.1088/1742-6596/1453/1/012001/meta
0	H Sun, Z Li, X Liu, B Zhou, D Lin	Policy Continuation with Hindsight Inverse Dynamics	2019	Advances in Neural Information …	papers.nips.cc	http://papers.nips.cc/paper/9215-policy-continuation-with-hindsight-inverse-dynamics	http://papers.nips.cc/paper/9215-policy-continuation-with-hindsight-inverse-dynamics
0	A Rochette, Y Yaghoobzadeh, TJ Hazen	Unsupervised Domain Adaptation of Contextual Embeddings for Low-Resource Duplicate Question Detection	2019	arXiv preprint arXiv:1911.02645	arxiv.org	https://arxiv.org/abs/1911.02645	https://arxiv.org/abs/1911.02645
0	FJ Martínez-Murcia, JM Górriz…	A Deep Decomposition of MRI to Explore Neurodegeneration in Alzheimer's Disease	2018	2018 IEEE Nuclear …	ieeexplore.ieee.org	https://ieeexplore.ieee.org/abstract/document/8824320/	https://ieeexplore.ieee.org/abstract/document/8824320/
0	A Kolaman, D Malowany, RR Hagege…	Light Invariant Video Imaging for Improved Performance of Convolution Neural Networks	2018	IEEE Transactions on …	ieeexplore.ieee.org	https://ieeexplore.ieee.org/abstract/document/8382234/	https://ieeexplore.ieee.org/abstract/document/8382234/
0	V Rowtula, SR Oota, CV Jawahar	Towards Automated Evaluation of Handwritten Assessments	2019	… International Conference on …	ieeexplore.ieee.org	https://ieeexplore.ieee.org/abstract/document/8977982/	https://ieeexplore.ieee.org/abstract/document/8977982/
0	N Battan, A Venkat, A Sharma	DeepHuMS: Deep Human Motion Signature for 3D Skeletal Sequences	2019	arXiv preprint arXiv:1908.05750	arxiv.org	https://arxiv.org/abs/1908.05750	https://arxiv.org/abs/1908.05750
0	A Kormilitzin, N Vaci, Q Liu…	Med7: a transferable clinical natural language processing model for electronic health records	2020	arXiv preprint arXiv …	arxiv.org	https://arxiv.org/abs/2003.01271	https://arxiv.org/abs/2003.01271
0	Y Tian, Y Wang, D Krishnan, JB Tenenbaum…	Rethinking Few-Shot Image Classification: a Good Embedding Is All You Need?	2020	arXiv preprint arXiv …	arxiv.org	https://arxiv.org/abs/2003.11539	https://arxiv.org/abs/2003.11539
0	RP Rane, E Szügyi, V Saxena, A Ofner, S Stober	PredNet and Predictive Coding: A Critical Review		researchgate.net		https://www.researchgate.net/profile/Roshan_Rane/publication/334129913_PredNet_and_Predictive_Coding_A_Critical_Review/links/5e40304c299bf1cdb91bd39f/PredNet-and-Predictive-Coding-A-Critical-Review.pdf	https://www.researchgate.net/profile/Roshan_Rane/publication/334129913_PredNet_and_Predictive_Coding_A_Critical_Review/links/5e40304c299bf1cdb91bd39f/PredNet-and-Predictive-Coding-A-Critical-Review.pdf
0	S Lee, S Park, D Cho, J Kim, TH Kim	Restore from Restored: Video Restoration with Pseudo Clean Video	2020	arXiv preprint arXiv:2003.04279	arxiv.org	https://arxiv.org/abs/2003.04279	https://arxiv.org/abs/2003.04279
0	S Sengupta	Constraints and Priors for Inverse Rendering from Limited Observations	2019		search.proquest.com	http://search.proquest.com/openview/49a51368384acadeccf3efd780e39b82/1?pq-origsite=gscholar&cbl=18750&diss=y	http://search.proquest.com/openview/49a51368384acadeccf3efd780e39b82/1?pq-origsite=gscholar&cbl=18750&diss=y
0	X Yang, W Shi, H Dou, J Qian, Y Wang, W Xue…	FetusMap: Fetal Pose Estimation in 3D Ultrasound	2019	… Conference on Medical …	Springer	https://link.springer.com/chapter/10.1007/978-3-030-32254-0_32	https://link.springer.com/chapter/10.1007/978-3-030-32254-0_32
0	F Kluger, E Brachmann, H Ackermann, C Rother…	CONSAC: Robust Multi-Model Fitting by Conditional Sample Consensus	2020	arXiv preprint arXiv …	arxiv.org	https://arxiv.org/abs/2001.02643	https://arxiv.org/abs/2001.02643
0	C Au, C Woo	Self-Learning SISO Neural Network Controller
0	R Mahadev, H Lu	Improving Visual Recognition using Ambient Sound for Supervision	2019	arXiv preprint arXiv:1912.11659	arxiv.org	https://arxiv.org/abs/1912.11659	https://arxiv.org/abs/1912.11659
0	AJ Champandard	Neural Rendering Pipeline for Face Inversion and Reconstruction		neurips2019creativity.github.io		https://neurips2019creativity.github.io/doc/Photo_Realistic_Neural_Inverse_Rendering_and_Face_Reconstruction.pdf	https://neurips2019creativity.github.io/doc/Photo_Realistic_Neural_Inverse_Rendering_and_Face_Reconstruction.pdf
0	I Kleitsiotis, N Dimitriou, K Votis, D Tzovaras	Color-Guided Adaptive Support Weights for Active Stereo Systems	2019	International Conference on …	Springer	https://link.springer.com/chapter/10.1007/978-3-030-34995-0_45	https://link.springer.com/chapter/10.1007/978-3-030-34995-0_45
0	D Rivoir, S Bodenstedt, F von Bechtolsheim…	Unsupervised Temporal Video Segmentation as an Auxiliary Task for Predicting the Remaining Surgery Duration	2019	OR 2.0 Context-Aware …	Springer	https://link.springer.com/chapter/10.1007/978-3-030-32695-1_4	https://link.springer.com/chapter/10.1007/978-3-030-32695-1_4
0	이홍구	Online traversable region detection with an unsupervised learning framework= 비교사 학습에 기반한 온라인 주행 영역 검출 연구	2016		koasas.kaist.ac.kr	https://koasas.kaist.ac.kr/handle/10203/222419	https://koasas.kaist.ac.kr/handle/10203/222419
0	G Charpiat, V Berger, W Liu	Deep Learning in Practice		lri.fr		https://www.lri.fr/~gcharpia/deeppractice/2020/presentation_cours_MVA.pdf	https://www.lri.fr/~gcharpia/deeppractice/2020/presentation_cours_MVA.pdf
0	M Fain, A Ponikar, R Fox, D Bollegala	Dividing and Conquering Cross-Modal Recipe Retrieval: from Nearest Neighbours Baselines to SoTA	2019	arXiv preprint arXiv:1911.12763	arxiv.org	https://arxiv.org/abs/1911.12763	https://arxiv.org/abs/1911.12763
0	M Stanojevic, J Alshehri, E Dragut, Z Obradovic	Biased News Data Influence on Classifying Social Media Posts	2019	algorithms	cis.temple.edu	https://cis.temple.edu/~edragut/papers/BiasedClassification-NewsIR.pdf	https://cis.temple.edu/~edragut/papers/BiasedClassification-NewsIR.pdf
0	T Shi, Z Zou, Y Yuan, C Fan	Fast and Robust Face-to-Parameter Translation for Game Character Auto-Creation		aaai.org		https://www.aaai.org/Papers/AAAI/2020GB/AAAI-ShiT.147.pdf	https://www.aaai.org/Papers/AAAI/2020GB/AAAI-ShiT.147.pdf
0	H Jiang	Smooth Regularized Reinforcement Learning	2019		openreview.net	https://openreview.net/pdf?id=Skg9FhVYPS	https://openreview.net/pdf?id=Skg9FhVYPS
0	M Zhang, Y Zhou, J Zhao, Y Man, B Liu…	A survey of semi-and weakly supervised semantic segmentation of images	2019	Artificial Intelligence …	Springer	https://link.springer.com/article/10.1007/s10462-019-09792-7	https://link.springer.com/article/10.1007/s10462-019-09792-7
0	C Dondi, A Dutta, M Malaspina…	The Use and Reuse of Printed Illustrations in 15th-Century Venetian Editions	2019	ACM International …	robots.ox.ac.uk	http://www.robots.ox.ac.uk:5000/~vgg/publications/	http://www.robots.ox.ac.uk:5000/~vgg/publications/
0	Y Guo, J Choi, M Moczulski, S Bengio…	Efficient Exploration with Self-Imitation Learning via Trajectory-Conditioned Policy	2019	arXiv preprint arXiv …	arxiv.org	https://arxiv.org/abs/1907.10247	https://arxiv.org/abs/1907.10247
0	TA Song, SR Chowdhury, F Yang, J Dutta	PET image super-resolution using generative adversarial networks	2020	Neural Networks	Elsevier	https://www.sciencedirect.com/science/article/pii/S0893608020300393	https://www.sciencedirect.com/science/article/pii/S0893608020300393
0	P Zhu, J Zheng, D Du, L Wen, Y Sun, Q Hu	Multi-Drone based Single Object Tracking with Agent Sharing Network	2020	arXiv preprint arXiv …	arxiv.org	https://arxiv.org/abs/2003.06994	https://arxiv.org/abs/2003.06994
0	JN Kundu, J Patravali…	Unsupervised Cross-Dataset Adaptation via Probabilistic Amodal 3D Human Pose Completion	2020	The IEEE Winter …	openaccess.thecvf.com	http://openaccess.thecvf.com/content_WACV_2020/html/Kundu_Unsupervised_Cross-Dataset_Adaptation_via_Probabilistic_Amodal_3D_Human_Pose_Completion_WACV_2020_paper.html	http://openaccess.thecvf.com/content_WACV_2020/html/Kundu_Unsupervised_Cross-Dataset_Adaptation_via_Probabilistic_Amodal_3D_Human_Pose_Completion_WACV_2020_paper.html
0	Y Liu, F Lu	Separate from Observation: Unsupervised Single Image Layer Separation	2019	arXiv preprint arXiv:1906.00734	arxiv.org	https://arxiv.org/abs/1906.00734	https://arxiv.org/abs/1906.00734
0	D Epstein, B Chen, C Vondrick	Oops! Predicting Unintentional Action in Video	2019	arXiv preprint arXiv:1911.11206	arxiv.org	https://arxiv.org/abs/1911.11206	https://arxiv.org/abs/1911.11206
0	J Rasiel	Machine Learning for Robotic Grasping	2017		pdfs.semanticscholar.org	https://pdfs.semanticscholar.org/6995/1a24fed458585f3d6427352d72fd10df9517.pdf	https://pdfs.semanticscholar.org/6995/1a24fed458585f3d6427352d72fd10df9517.pdf
0	S Wolf, FA Hamprecht, J Funke	Instance Separation Emerges from Inpainting	2020	arXiv preprint arXiv:2003.00891	arxiv.org	https://arxiv.org/abs/2003.00891	https://arxiv.org/abs/2003.00891
0	S Chen, Q Wang, J Chen, T Wu	An Intelligent Task Offloading Algorithm (iTOA) for UAV Network	2019	2019 IEEE Globecom …	ieeexplore.ieee.org	https://ieeexplore.ieee.org/abstract/document/9024682/	https://ieeexplore.ieee.org/abstract/document/9024682/
0	Y Zhang, L Niu, Z Pan, M Luo, J Zhang…	Exploiting Motion Information from Unlabeled Videos for Static Image Action Recognition	2019	arXiv preprint arXiv …	arxiv.org	https://arxiv.org/abs/1912.00308	https://arxiv.org/abs/1912.00308
0	H Zhao	Visual and auditory scene parsing	2019		dspace.mit.edu	https://dspace.mit.edu/handle/1721.1/122101	https://dspace.mit.edu/handle/1721.1/122101
0	PT Nitti, E Perot, D Migliore, A Sironi	A Large Scale Event-based Detection Dataset for Automotive	2020	arXiv preprint arXiv:2001.08499	arxiv.org	https://arxiv.org/abs/2001.08499	https://arxiv.org/abs/2001.08499
0	Y Yan, W Qi, Y Gong, D Liu, N Duan, J Chen…	ProphetNet: Predicting Future N-gram for Sequence-to-Sequence Pre-training	2020	arXiv preprint arXiv …	arxiv.org	https://arxiv.org/abs/2001.04063	https://arxiv.org/abs/2001.04063
0	D Gupta	Word Vectors	2018		cvml.ist.ac.at	https://cvml.ist.ac.at/courses/DLWT_W18/material/word2vec.pdf	https://cvml.ist.ac.at/courses/DLWT_W18/material/word2vec.pdf
0	坂本周司, 山田良博, 岩村雅一, 岩田基…	読書行動識別のための Self-supervised Learning の実験的検討 (ヒューマン情報処理)	2019	… technical report: 信学技報	ci.nii.ac.jp	https://ci.nii.ac.jp/naid/40022118067/	https://ci.nii.ac.jp/naid/40022118067/
0	정해창, 주정우, 임준호, 김준모	Self-supervised Learning 을 이용한 Outlier Detection	2018	제 30 회 영상처리 및 이해에 …	koasas.kaist.ac.kr	https://koasas.kaist.ac.kr/handle/10203/247548	https://koasas.kaist.ac.kr/handle/10203/247548
0	B Ridge	Learning basic object affordances in a robotic system: doctoral dissertation	2014		repozitorij.uni-lj.si	https://repozitorij.uni-lj.si/IzpisGradiva.php?id=69129	https://repozitorij.uni-lj.si/IzpisGradiva.php?id=69129
0	김태훈, 황원준	CNN 기반 Jigsaw Puzzle 문제 해결 연구	2019	한국통신학회 학술대회논문집	dbpia.co.kr	http://www.dbpia.co.kr/Journal/articleDetail?nodeId=NODE09277820	http://www.dbpia.co.kr/Journal/articleDetail?nodeId=NODE09277820
0	丛杨, 宋红玉, 唐延东	低秩约束的在线自监督学习的场景分类方法	2014		ir.sia.cn	http://ir.sia.cn/handle/173321/15008	http://ir.sia.cn/handle/173321/15008
0	O Prades Palacios	Descripcion de los colores de una imagen mediante tecnicas de Deep learning		ddd.uab.cat		https://ddd.uab.cat/record/181561	https://ddd.uab.cat/record/181561
0	N Tomáš	Učení optického toku bez učitele	2020		dspace.cvut.cz	https://dspace.cvut.cz/handle/10467/86026	https://dspace.cvut.cz/handle/10467/86026
0	이윤관, 이주현, 전지원, 송영민, 전문구	회전 불변의 자기지도적 물체 검출	2019	한국정보과학회 학술발표 …	dbpia.co.kr	http://www.dbpia.co.kr/Journal/articleDetail?nodeId=NODE09301712	http://www.dbpia.co.kr/Journal/articleDetail?nodeId=NODE09301712
0	이수동, 황선희, 최영우, 변혜란	확장 합성곱 신경망과 자기 지도 순환 적대적 생성 신경망을 이용한 안개 제거 네트워크	2020	정보과학회 컴퓨팅의 실제 논문지	dbpia.co.kr	http://www.dbpia.co.kr/Journal/articleDetail?nodeId=NODE09301426	http://www.dbpia.co.kr/Journal/articleDetail?nodeId=NODE09301426
0	SHN Network	発表論文等リスト

## Sheet: sc "self-supervised learning"
2021 resulting Self-Supervised Learning paper collection as published in A. Chowdhury, J. Rosenthal, J. Waring, R. Umeton, 2021.
Review - Applied Self-Supervised Learning: Review of the State of the Art and Implementations in Medicine, 2021.
# Citations	Authors	Title	Year	Source	Publisher	ArticleURL	Link
300	R. Zhang	Colorful image colorization	2016	Lecture Notes in Computer Science (including subseries Lecture Notes in Artificial Intelligence and Lecture Notes in Bioinformatics)		https://www.scopus.com/inward/record.uri?partnerID=HzOxMe3b&scp=84990065769&origin=inward	https://www.scopus.com/inward/record.uri?partnerID=HzOxMe3b&scp=84990065769&origin=inward
80	K. Gong	Look into Person: Self-supervised Structure-sensitive Learning and a new benchmark for human parsing	2017	Proceedings - 30th IEEE Conference on Computer Vision and Pattern Recognition, CVPR 2017		https://www.scopus.com/inward/record.uri?partnerID=HzOxMe3b&scp=85044502815&origin=inward	https://www.scopus.com/inward/record.uri?partnerID=HzOxMe3b&scp=85044502815&origin=inward
74	M. Noroozi	Unsupervised learning of visual representations by solving jigsaw puzzles	2016	Lecture Notes in Computer Science (including subseries Lecture Notes in Artificial Intelligence and Lecture Notes in Bioinformatics)		https://www.scopus.com/inward/record.uri?partnerID=HzOxMe3b&scp=84990041197&origin=inward	https://www.scopus.com/inward/record.uri?partnerID=HzOxMe3b&scp=84990041197&origin=inward
51	H. Tung	Self-supervised learning of motion capture	2017	Advances in Neural Information Processing Systems		https://www.scopus.com/inward/record.uri?partnerID=HzOxMe3b&scp=85046995156&origin=inward	https://www.scopus.com/inward/record.uri?partnerID=HzOxMe3b&scp=85046995156&origin=inward
49	A. Kulkarni	Solving 0–1 Knapsack Problem using Cohort Intelligence Algorithm	2016	International Journal of Machine Learning and Cybernetics		https://www.scopus.com/inward/record.uri?partnerID=HzOxMe3b&scp=84971321457&origin=inward	https://www.scopus.com/inward/record.uri?partnerID=HzOxMe3b&scp=84971321457&origin=inward
45	B. Fernando	Self-supervised video representation learning with odd-one-out networks	2017	Proceedings - 30th IEEE Conference on Computer Vision and Pattern Recognition, CVPR 2017		https://www.scopus.com/inward/record.uri?partnerID=HzOxMe3b&scp=85041924012&origin=inward	https://www.scopus.com/inward/record.uri?partnerID=HzOxMe3b&scp=85041924012&origin=inward
31	S. Watanabe	Student-teacher network learning with enhanced features	2017	ICASSP, IEEE International Conference on Acoustics, Speech and Signal Processing - Proceedings		https://www.scopus.com/inward/record.uri?partnerID=HzOxMe3b&scp=85023758862&origin=inward	https://www.scopus.com/inward/record.uri?partnerID=HzOxMe3b&scp=85023758862&origin=inward
30	X. Wang	Transitive Invariance for Self-Supervised Visual Representation Learning	2017	Proceedings of the IEEE International Conference on Computer Vision		https://www.scopus.com/inward/record.uri?partnerID=HzOxMe3b&scp=85041911015&origin=inward	https://www.scopus.com/inward/record.uri?partnerID=HzOxMe3b&scp=85041911015&origin=inward
29	P. Sermanet	Time-Contrastive Networks: Self-Supervised Learning from Video	2018	Proceedings - IEEE International Conference on Robotics and Automation		https://www.scopus.com/inward/record.uri?partnerID=HzOxMe3b&scp=85060855803&origin=inward	https://www.scopus.com/inward/record.uri?partnerID=HzOxMe3b&scp=85060855803&origin=inward
26	A. Nair	Combining self-supervised learning and imitation for vision-based rope manipulation	2017	Proceedings - IEEE International Conference on Robotics and Automation		https://www.scopus.com/inward/record.uri?partnerID=HzOxMe3b&scp=85028009704&origin=inward	https://www.scopus.com/inward/record.uri?partnerID=HzOxMe3b&scp=85028009704&origin=inward
23	K. Otsu	Autonomous Terrain Classification with Co-and Self-Training Approach	2016	IEEE Robotics and Automation Letters		https://www.scopus.com/inward/record.uri?partnerID=HzOxMe3b&scp=85063312291&origin=inward	https://www.scopus.com/inward/record.uri?partnerID=HzOxMe3b&scp=85063312291&origin=inward
23	L. Gomez	Self-supervised learning of visual features through embedding images into text topic spaces	2017	Proceedings - 30th IEEE Conference on Computer Vision and Pattern Recognition, CVPR 2017		https://www.scopus.com/inward/record.uri?partnerID=HzOxMe3b&scp=85044262532&origin=inward	https://www.scopus.com/inward/record.uri?partnerID=HzOxMe3b&scp=85044262532&origin=inward
23	T. Mar	Self-supervised learning of grasp dependent tool affordances on the iCub Humanoid robot	2015	Proceedings - IEEE International Conference on Robotics and Automation		https://www.scopus.com/inward/record.uri?partnerID=HzOxMe3b&scp=84938261296&origin=inward	https://www.scopus.com/inward/record.uri?partnerID=HzOxMe3b&scp=84938261296&origin=inward
22	M. Noroozi	Boosting Self-Supervised Learning via Knowledge Transfer	2018	Proceedings of the IEEE Computer Society Conference on Computer Vision and Pattern Recognition		https://www.scopus.com/inward/record.uri?partnerID=HzOxMe3b&scp=85061702667&origin=inward	https://www.scopus.com/inward/record.uri?partnerID=HzOxMe3b&scp=85061702667&origin=inward
22	A. Masood	Self-supervised learning model for skin cancer diagnosis	2015	International IEEE/EMBS Conference on Neural Engineering, NER		https://www.scopus.com/inward/record.uri?partnerID=HzOxMe3b&scp=84940371172&origin=inward	https://www.scopus.com/inward/record.uri?partnerID=HzOxMe3b&scp=84940371172&origin=inward
21	K. Wurm	Identifying vegetation from laser data in structured outdoor environments	2014	Robotics and Autonomous Systems		https://www.scopus.com/inward/record.uri?partnerID=HzOxMe3b&scp=84897912640&origin=inward	https://www.scopus.com/inward/record.uri?partnerID=HzOxMe3b&scp=84897912640&origin=inward
20	X. Zheng	Fast and robust segmentation of white blood cell images by self-supervised learning	2018	Micron		https://www.scopus.com/inward/record.uri?partnerID=HzOxMe3b&scp=85041422034&origin=inward	https://www.scopus.com/inward/record.uri?partnerID=HzOxMe3b&scp=85041422034&origin=inward
19	C. Mitash	A self-supervised learning system for object detection using physics simulation and multi-view pose estimation	2017	IEEE International Conference on Intelligent Robots and Systems		https://www.scopus.com/inward/record.uri?partnerID=HzOxMe3b&scp=85041943411&origin=inward	https://www.scopus.com/inward/record.uri?partnerID=HzOxMe3b&scp=85041943411&origin=inward
19	D. Cho	Weakly- and Self-Supervised Learning for Content-Aware Deep Image Retargeting	2017	Proceedings of the IEEE International Conference on Computer Vision		https://www.scopus.com/inward/record.uri?partnerID=HzOxMe3b&scp=85041923958&origin=inward	https://www.scopus.com/inward/record.uri?partnerID=HzOxMe3b&scp=85041923958&origin=inward
18	B. Brattoli	LSTM self-supervision for detailed behavior analysis	2017	Proceedings - 30th IEEE Conference on Computer Vision and Pattern Recognition, CVPR 2017		https://www.scopus.com/inward/record.uri?partnerID=HzOxMe3b&scp=85041907940&origin=inward	https://www.scopus.com/inward/record.uri?partnerID=HzOxMe3b&scp=85041907940&origin=inward
17	H. Li	Non-rigid image registration using self-supervised fully convolutional networks without training data	2018	Proceedings - International Symposium on Biomedical Imaging		https://www.scopus.com/inward/record.uri?partnerID=HzOxMe3b&scp=85048134220&origin=inward	https://www.scopus.com/inward/record.uri?partnerID=HzOxMe3b&scp=85048134220&origin=inward
16	S. Jenni	Self-Supervised Feature Learning by Learning to Spot Artifacts	2018	Proceedings of the IEEE Computer Society Conference on Computer Vision and Pattern Recognition		https://www.scopus.com/inward/record.uri?partnerID=HzOxMe3b&scp=85062821647&origin=inward	https://www.scopus.com/inward/record.uri?partnerID=HzOxMe3b&scp=85062821647&origin=inward
14	T. Mundhenk	Improvements to Context Based Self-Supervised Learning	2018	Proceedings of the IEEE Computer Society Conference on Computer Vision and Pattern Recognition		https://www.scopus.com/inward/record.uri?partnerID=HzOxMe3b&scp=85062826302&origin=inward	https://www.scopus.com/inward/record.uri?partnerID=HzOxMe3b&scp=85062826302&origin=inward
14	W. Sanberg	Extending the Stixel World with online self-supervised color modeling for road-versus-obstacle segmentation	2014	2014 17th IEEE International Conference on Intelligent Transportation Systems, ITSC 2014		https://www.scopus.com/inward/record.uri?partnerID=HzOxMe3b&scp=84937144959&origin=inward	https://www.scopus.com/inward/record.uri?partnerID=HzOxMe3b&scp=84937144959&origin=inward
12	C. Gan	Geometry Guided Convolutional Neural Networks for Self-Supervised Video Representation Learning	2018	Proceedings of the IEEE Computer Society Conference on Computer Vision and Pattern Recognition		https://www.scopus.com/inward/record.uri?partnerID=HzOxMe3b&scp=85055116399&origin=inward	https://www.scopus.com/inward/record.uri?partnerID=HzOxMe3b&scp=85055116399&origin=inward
12	C. Senaras	A Self-Supervised Decision Fusion Framework for Building Detection	2016	IEEE Journal of Selected Topics in Applied Earth Observations and Remote Sensing		https://www.scopus.com/inward/record.uri?partnerID=HzOxMe3b&scp=84939211533&origin=inward	https://www.scopus.com/inward/record.uri?partnerID=HzOxMe3b&scp=84939211533&origin=inward
12	F. Hu	Self-supervised synonym extraction from the web	2015	Journal of Information Science and Engineering		https://www.scopus.com/inward/record.uri?partnerID=HzOxMe3b&scp=84934270157&origin=inward	https://www.scopus.com/inward/record.uri?partnerID=HzOxMe3b&scp=84934270157&origin=inward
11	T. Ross	Exploiting the potential of unlabeled endoscopic video data with self-supervised learning	2018	International Journal of Computer Assisted Radiology and Surgery		https://www.scopus.com/inward/record.uri?partnerID=HzOxMe3b&scp=85046042133&origin=inward	https://www.scopus.com/inward/record.uri?partnerID=HzOxMe3b&scp=85046042133&origin=inward
11	A. Sanakoyeu	Deep unsupervised learning of visual similarities	2018	Pattern Recognition		https://www.scopus.com/inward/record.uri?partnerID=HzOxMe3b&scp=85042413678&origin=inward	https://www.scopus.com/inward/record.uri?partnerID=HzOxMe3b&scp=85042413678&origin=inward
11	J. Baleia	On Exploiting Haptic Cues for Self-Supervised Learning of Depth-Based Robot Navigation Affordances	2015	Journal of Intelligent and Robotic Systems: Theory and Applications		https://www.scopus.com/inward/record.uri?partnerID=HzOxMe3b&scp=84945460924&origin=inward	https://www.scopus.com/inward/record.uri?partnerID=HzOxMe3b&scp=84945460924&origin=inward
10	D. Novotny	Self-Supervised Learning of Geometrically Stable Features Through Probabilistic Introspection	2018	Proceedings of the IEEE Computer Society Conference on Computer Vision and Pattern Recognition		https://www.scopus.com/inward/record.uri?partnerID=HzOxMe3b&scp=85062870752&origin=inward	https://www.scopus.com/inward/record.uri?partnerID=HzOxMe3b&scp=85062870752&origin=inward
10	Y. Tian	CR-GAN: Learning complete representations for multi-view generation	2018	IJCAI International Joint Conference on Artificial Intelligence		https://www.scopus.com/inward/record.uri?partnerID=HzOxMe3b&scp=85055446792&origin=inward	https://www.scopus.com/inward/record.uri?partnerID=HzOxMe3b&scp=85055446792&origin=inward
10	X. Liu	Self-supervised learning for dense depth estimation in monocular endoscopy	2018	Lecture Notes in Computer Science (including subseries Lecture Notes in Artificial Intelligence and Lecture Notes in Bioinformatics)		https://www.scopus.com/inward/record.uri?partnerID=HzOxMe3b&scp=85054850438&origin=inward	https://www.scopus.com/inward/record.uri?partnerID=HzOxMe3b&scp=85054850438&origin=inward
10	T. Wang	Data-driven prognostic method based on self-supervised learning approaches for fault detection	2018	Journal of Intelligent Manufacturing		https://www.scopus.com/inward/record.uri?partnerID=HzOxMe3b&scp=85049090142&origin=inward	https://www.scopus.com/inward/record.uri?partnerID=HzOxMe3b&scp=85049090142&origin=inward
10	N. Patankar	Variations of cohort intelligence	2018	Soft Computing		https://www.scopus.com/inward/record.uri?partnerID=HzOxMe3b&scp=85019684813&origin=inward	https://www.scopus.com/inward/record.uri?partnerID=HzOxMe3b&scp=85019684813&origin=inward
10	H. Lu	Long range traversable region detection based on superpixels clustering for mobile robots	2015	IEEE International Conference on Intelligent Robots and Systems		https://www.scopus.com/inward/record.uri?partnerID=HzOxMe3b&scp=84958165778&origin=inward	https://www.scopus.com/inward/record.uri?partnerID=HzOxMe3b&scp=84958165778&origin=inward
9	M. Kocabas	Self-supervised learning of 3D human pose using multi-view geometry	2019	Proceedings of the IEEE Computer Society Conference on Computer Vision and Pattern Recognition		https://www.scopus.com/inward/record.uri?partnerID=HzOxMe3b&scp=85076215792&origin=inward	https://www.scopus.com/inward/record.uri?partnerID=HzOxMe3b&scp=85076215792&origin=inward
9	D. Konar	A quantum bi-directional self-organizing neural network (QBDSONN) architecture for binary object extraction from a noisy perspective	2016	Applied Soft Computing Journal		https://www.scopus.com/inward/record.uri?partnerID=HzOxMe3b&scp=84958213058&origin=inward	https://www.scopus.com/inward/record.uri?partnerID=HzOxMe3b&scp=84958213058&origin=inward
9	F. Hu	Self-supervised chinese ontology learning from online encyclopedias	2014	The Scientific World Journal		https://www.scopus.com/inward/record.uri?partnerID=HzOxMe3b&scp=84897479043&origin=inward	https://www.scopus.com/inward/record.uri?partnerID=HzOxMe3b&scp=84897479043&origin=inward
8	X. Liu	Exploiting Unlabeled Data in CNNs by Self-Supervised Learning to Rank	2019	IEEE Transactions on Pattern Analysis and Machine Intelligence		https://www.scopus.com/inward/record.uri?partnerID=HzOxMe3b&scp=85068439990&origin=inward	https://www.scopus.com/inward/record.uri?partnerID=HzOxMe3b&scp=85068439990&origin=inward
8	H. Chen	Reblur2Deblur: Deblurring videos via self-supervised learning	2018	IEEE International Conference on Computational Photography, ICCP 2018		https://www.scopus.com/inward/record.uri?partnerID=HzOxMe3b&scp=85048876047&origin=inward	https://www.scopus.com/inward/record.uri?partnerID=HzOxMe3b&scp=85048876047&origin=inward
8	A. Dehban	A deep probabilistic framework for heterogeneous self-supervised learning of affordances	2017	IEEE-RAS International Conference on Humanoid Robots		https://www.scopus.com/inward/record.uri?partnerID=HzOxMe3b&scp=85044454141&origin=inward	https://www.scopus.com/inward/record.uri?partnerID=HzOxMe3b&scp=85044454141&origin=inward
8	S. Pillai	Towards visual ego-motion learning in robots	2017	IEEE International Conference on Intelligent Robots and Systems		https://www.scopus.com/inward/record.uri?partnerID=HzOxMe3b&scp=85041964690&origin=inward	https://www.scopus.com/inward/record.uri?partnerID=HzOxMe3b&scp=85041964690&origin=inward
8	A. Gogna	Semi supervised autoencoder	2016	Lecture Notes in Computer Science (including subseries Lecture Notes in Artificial Intelligence and Lecture Notes in Bioinformatics)		https://www.scopus.com/inward/record.uri?partnerID=HzOxMe3b&scp=84992666049&origin=inward	https://www.scopus.com/inward/record.uri?partnerID=HzOxMe3b&scp=84992666049&origin=inward
7	C. Godard	Digging into self-supervised monocular depth estimation	2019	Proceedings of the IEEE International Conference on Computer Vision		https://www.scopus.com/inward/record.uri?partnerID=HzOxMe3b&scp=85081918599&origin=inward	https://www.scopus.com/inward/record.uri?partnerID=HzOxMe3b&scp=85081918599&origin=inward
7	A. Amini	Variational Autoencoder for End-to-End Control of Autonomous Driving with Novelty Detection and Training De-biasing	2018	IEEE International Conference on Intelligent Robots and Systems		https://www.scopus.com/inward/record.uri?partnerID=HzOxMe3b&scp=85062936400&origin=inward	https://www.scopus.com/inward/record.uri?partnerID=HzOxMe3b&scp=85062936400&origin=inward
7	O. Sumer	Self-Supervised Learning of Pose Embeddings from Spatiotemporal Relations in Videos	2017	Proceedings of the IEEE International Conference on Computer Vision		https://www.scopus.com/inward/record.uri?partnerID=HzOxMe3b&scp=85041924486&origin=inward	https://www.scopus.com/inward/record.uri?partnerID=HzOxMe3b&scp=85041924486&origin=inward
7	K. Lamers	Self-supervised monocular distance learning on a lightweight micro air vehicle	2016	IEEE International Conference on Intelligent Robots and Systems		https://www.scopus.com/inward/record.uri?partnerID=HzOxMe3b&scp=85006474788&origin=inward	https://www.scopus.com/inward/record.uri?partnerID=HzOxMe3b&scp=85006474788&origin=inward
7	B. Ridge	Self-supervised online learning of basic object push affordances	2015	International Journal of Advanced Robotic Systems		https://www.scopus.com/inward/record.uri?partnerID=HzOxMe3b&scp=84930503325&origin=inward	https://www.scopus.com/inward/record.uri?partnerID=HzOxMe3b&scp=84930503325&origin=inward
6	A. Kolesnikov	Revisiting self-supervised visual representation learning	2019	Proceedings of the IEEE Computer Society Conference on Computer Vision and Pattern Recognition		https://www.scopus.com/inward/record.uri?partnerID=HzOxMe3b&scp=85075533888&origin=inward	https://www.scopus.com/inward/record.uri?partnerID=HzOxMe3b&scp=85075533888&origin=inward
6	X. Shen	Discovering visual patterns in art collections with spatially-consistent feature learning	2019	Proceedings of the IEEE Computer Society Conference on Computer Vision and Pattern Recognition		https://www.scopus.com/inward/record.uri?partnerID=HzOxMe3b&scp=85072899384&origin=inward	https://www.scopus.com/inward/record.uri?partnerID=HzOxMe3b&scp=85072899384&origin=inward
6	M. Lee	Making sense of vision and touch: Self-supervised learning of multimodal representations for contact-rich tasks	2019	Proceedings - IEEE International Conference on Robotics and Automation		https://www.scopus.com/inward/record.uri?partnerID=HzOxMe3b&scp=85071431002&origin=inward	https://www.scopus.com/inward/record.uri?partnerID=HzOxMe3b&scp=85071431002&origin=inward
6	H. Spitzer	Improving cytoarchitectonic segmentation of human brain areas with self-supervised siamese networks	2018	Lecture Notes in Computer Science (including subseries Lecture Notes in Artificial Intelligence and Lecture Notes in Bioinformatics)		https://www.scopus.com/inward/record.uri?partnerID=HzOxMe3b&scp=85053900288&origin=inward	https://www.scopus.com/inward/record.uri?partnerID=HzOxMe3b&scp=85053900288&origin=inward
6	K. van Hecke	Self-supervised learning as an enabling technology for future space exploration robots: ISS experiments on monocular distance learning	2017	Acta Astronautica		https://www.scopus.com/inward/record.uri?partnerID=HzOxMe3b&scp=85026883328&origin=inward	https://www.scopus.com/inward/record.uri?partnerID=HzOxMe3b&scp=85026883328&origin=inward
6	H. Ho	Optical flow for self-supervised learning of obstacle appearance	2015	IEEE International Conference on Intelligent Robots and Systems		https://www.scopus.com/inward/record.uri?partnerID=HzOxMe3b&scp=84958160340&origin=inward	https://www.scopus.com/inward/record.uri?partnerID=HzOxMe3b&scp=84958160340&origin=inward
5	H. Wang	Self-Supervised Drivable Area and Road Anomaly Segmentation Using RGB-D Data for Robotic Wheelchairs	2019	IEEE Robotics and Automation Letters		https://www.scopus.com/inward/record.uri?partnerID=HzOxMe3b&scp=85071502158&origin=inward	https://www.scopus.com/inward/record.uri?partnerID=HzOxMe3b&scp=85071502158&origin=inward
5	L. Wellhausen	Where should i walk(Predicting terrain properties from images via self-supervised learning	2019	IEEE Robotics and Automation Letters		https://www.scopus.com/inward/record.uri?partnerID=HzOxMe3b&scp=85063310966&origin=inward	https://www.scopus.com/inward/record.uri?partnerID=HzOxMe3b&scp=85063310966&origin=inward
5	A. Atapour-Abarghouei	Generative adversarial framework for depth filling via Wasserstein metric, cosine transform and domain transfer	2019	Pattern Recognition		https://www.scopus.com/inward/record.uri?partnerID=HzOxMe3b&scp=85062227088&origin=inward	https://www.scopus.com/inward/record.uri?partnerID=HzOxMe3b&scp=85062227088&origin=inward
5	H. Ho	Optical-flow based self-supervised learning of obstacle appearance applied to MAV landing	2018	Robotics and Autonomous Systems		https://www.scopus.com/inward/record.uri?partnerID=HzOxMe3b&scp=85041351106&origin=inward	https://www.scopus.com/inward/record.uri?partnerID=HzOxMe3b&scp=85041351106&origin=inward
5	A. Jamaludin	Self-supervised learning for spinal MRIs	2017	Lecture Notes in Computer Science (including subseries Lecture Notes in Artificial Intelligence and Lecture Notes in Bioinformatics)		https://www.scopus.com/inward/record.uri?partnerID=HzOxMe3b&scp=85029809925&origin=inward	https://www.scopus.com/inward/record.uri?partnerID=HzOxMe3b&scp=85029809925&origin=inward
5	T. Mar	Self-supervised learning of tool affordances from 3D tool representation through parallel SOM mapping	2017	Proceedings - IEEE International Conference on Robotics and Automation		https://www.scopus.com/inward/record.uri?partnerID=HzOxMe3b&scp=85027991467&origin=inward	https://www.scopus.com/inward/record.uri?partnerID=HzOxMe3b&scp=85027991467&origin=inward
5	J. Baleia	Self-supervised learning of depth-based navigation affordances from haptic cues	2014	2014 IEEE International Conference on Autonomous Robot Systems and Competitions, ICARSC 2014		https://www.scopus.com/inward/record.uri?partnerID=HzOxMe3b&scp=84904976539&origin=inward	https://www.scopus.com/inward/record.uri?partnerID=HzOxMe3b&scp=84904976539&origin=inward
4	J. Cramer	Look, Listen, and Learn More: Design Choices for Deep Audio Embeddings	2019	ICASSP, IEEE International Conference on Acoustics, Speech and Signal Processing - Proceedings		https://www.scopus.com/inward/record.uri?partnerID=HzOxMe3b&scp=85068992001&origin=inward	https://www.scopus.com/inward/record.uri?partnerID=HzOxMe3b&scp=85068992001&origin=inward
4	U. Büchler	Improving spatiotemporal self-supervision by deep reinforcement learning	2018	Lecture Notes in Computer Science (including subseries Lecture Notes in Artificial Intelligence and Lecture Notes in Bioinformatics)		https://www.scopus.com/inward/record.uri?partnerID=HzOxMe3b&scp=85055428985&origin=inward	https://www.scopus.com/inward/record.uri?partnerID=HzOxMe3b&scp=85055428985&origin=inward
4	M. Huh	Fighting Fake News: Image Splice Detection via Learned Self-Consistency	2018	Lecture Notes in Computer Science (including subseries Lecture Notes in Artificial Intelligence and Lecture Notes in Bioinformatics)		https://www.scopus.com/inward/record.uri?partnerID=HzOxMe3b&scp=85055105278&origin=inward	https://www.scopus.com/inward/record.uri?partnerID=HzOxMe3b&scp=85055105278&origin=inward
4	I. Funke	Temporal coherence-based self-supervised learning for laparoscopic workflow analysis	2018	Lecture Notes in Computer Science (including subseries Lecture Notes in Artificial Intelligence and Lecture Notes in Bioinformatics)		https://www.scopus.com/inward/record.uri?partnerID=HzOxMe3b&scp=85054824492&origin=inward	https://www.scopus.com/inward/record.uri?partnerID=HzOxMe3b&scp=85054824492&origin=inward
4	Z. Liang	Improving stereo matching by incorporating geometry prior into ConvNet	2017	Electronics Letters		https://www.scopus.com/inward/record.uri?partnerID=HzOxMe3b&scp=85028777858&origin=inward	https://www.scopus.com/inward/record.uri?partnerID=HzOxMe3b&scp=85028777858&origin=inward
4	P. Zhang	Self supervised deep representation learning for fine-grained body part recognition	2017	Proceedings - International Symposium on Biomedical Imaging		https://www.scopus.com/inward/record.uri?partnerID=HzOxMe3b&scp=85023193225&origin=inward	https://www.scopus.com/inward/record.uri?partnerID=HzOxMe3b&scp=85023193225&origin=inward
4	H. Lee	An incremental nonparametric Bayesian clustering-based traversable region detection method	2017	Autonomous Robots		https://www.scopus.com/inward/record.uri?partnerID=HzOxMe3b&scp=84976504418&origin=inward	https://www.scopus.com/inward/record.uri?partnerID=HzOxMe3b&scp=84976504418&origin=inward
4	F. Schrodt	Modeling perspective-taking upon observation of 3D biological motion	2014	IEEE ICDL-EPIROB 2014 - 4th Joint IEEE International Conference on Development and Learning and on Epigenetic Robotics		https://www.scopus.com/inward/record.uri?partnerID=HzOxMe3b&scp=84920887595&origin=inward	https://www.scopus.com/inward/record.uri?partnerID=HzOxMe3b&scp=84920887595&origin=inward
3	Y. Li	Bidirectional learning for domain adaptation of semantic segmentation	2019	Proceedings of the IEEE Computer Society Conference on Computer Vision and Pattern Recognition		https://www.scopus.com/inward/record.uri?partnerID=HzOxMe3b&scp=85074658523&origin=inward	https://www.scopus.com/inward/record.uri?partnerID=HzOxMe3b&scp=85074658523&origin=inward
3	Z. Feng	Self-supervised representation learning by rotation feature decoupling	2019	Proceedings of the IEEE Computer Society Conference on Computer Vision and Pattern Recognition		https://www.scopus.com/inward/record.uri?partnerID=HzOxMe3b&scp=85074627626&origin=inward	https://www.scopus.com/inward/record.uri?partnerID=HzOxMe3b&scp=85074627626&origin=inward
3	S. Singh	Self-supervised feature learning for semantic segmentation of overhead imagery	2019	British Machine Vision Conference 2018, BMVC 2018		https://www.scopus.com/inward/record.uri?partnerID=HzOxMe3b&scp=85072306812&origin=inward	https://www.scopus.com/inward/record.uri?partnerID=HzOxMe3b&scp=85072306812&origin=inward
3	V. Sharma	Self-supervised learning of face representations for video face clustering	2019	Proceedings - 14th IEEE International Conference on Automatic Face and Gesture Recognition, FG 2019		https://www.scopus.com/inward/record.uri?partnerID=HzOxMe3b&scp=85070459608&origin=inward	https://www.scopus.com/inward/record.uri?partnerID=HzOxMe3b&scp=85070459608&origin=inward
3	A. Murali	CASSL: Curriculum Accelerated Self-Supervised Learning	2018	Proceedings - IEEE International Conference on Robotics and Automation		https://www.scopus.com/inward/record.uri?partnerID=HzOxMe3b&scp=85063141140&origin=inward	https://www.scopus.com/inward/record.uri?partnerID=HzOxMe3b&scp=85063141140&origin=inward
3	S. Chung	Perfect Match: Improved Cross-modal Embeddings for Audio-visual Synchronisation	2019	ICASSP, IEEE International Conference on Acoustics, Speech and Signal Processing - Proceedings		https://www.scopus.com/inward/record.uri?partnerID=HzOxMe3b&scp=85061627651&origin=inward	https://www.scopus.com/inward/record.uri?partnerID=HzOxMe3b&scp=85061627651&origin=inward
3	Y. Huang	Generating music medleys via playing music puzzle games	2018	32nd AAAI Conference on Artificial Intelligence, AAAI 2018		https://www.scopus.com/inward/record.uri?partnerID=HzOxMe3b&scp=85060448706&origin=inward	https://www.scopus.com/inward/record.uri?partnerID=HzOxMe3b&scp=85060448706&origin=inward
3	R. Hanocka	AligNet: Partial-shape agnostic alignment via unsupervised learning	2018	ACM Transactions on Graphics		https://www.scopus.com/inward/record.uri?partnerID=HzOxMe3b&scp=85058810785&origin=inward	https://www.scopus.com/inward/record.uri?partnerID=HzOxMe3b&scp=85058810785&origin=inward
3	C. Zhang	Better and faster: Knowledge transfer from multiple self-supervised learning tasks via graph distillation for video classification	2018	IJCAI International Joint Conference on Artificial Intelligence		https://www.scopus.com/inward/record.uri?partnerID=HzOxMe3b&scp=85055698490&origin=inward	https://www.scopus.com/inward/record.uri?partnerID=HzOxMe3b&scp=85055698490&origin=inward
3	P. Sermanet	Time-Contrastive Networks: Self-Supervised Learning from Multi-view Observation	2017	IEEE Computer Society Conference on Computer Vision and Pattern Recognition Workshops		https://www.scopus.com/inward/record.uri?partnerID=HzOxMe3b&scp=85030216251&origin=inward	https://www.scopus.com/inward/record.uri?partnerID=HzOxMe3b&scp=85030216251&origin=inward
2	S. Vitale	A CNN-based pansharpening method with perceptual loss	2019	International Geoscience and Remote Sensing Symposium (IGARSS)		https://www.scopus.com/inward/record.uri?partnerID=HzOxMe3b&scp=85077856020&origin=inward	https://www.scopus.com/inward/record.uri?partnerID=HzOxMe3b&scp=85077856020&origin=inward
2	T. Shen	Beyond photometric loss for self-supervised ego-motion estimation	2019	Proceedings - IEEE International Conference on Robotics and Automation		https://www.scopus.com/inward/record.uri?partnerID=HzOxMe3b&scp=85071435247&origin=inward	https://www.scopus.com/inward/record.uri?partnerID=HzOxMe3b&scp=85071435247&origin=inward
2	J. Chen	IRAF: A Deep Reinforcement Learning Approach for Collaborative Mobile Edge Computing IoT Networks	2019	IEEE Internet of Things Journal		https://www.scopus.com/inward/record.uri?partnerID=HzOxMe3b&scp=85070187979&origin=inward	https://www.scopus.com/inward/record.uri?partnerID=HzOxMe3b&scp=85070187979&origin=inward
2	Y. Jiang	CP-SSD: Context information scene perception object detection based on SSD	2019	Applied Sciences (Switzerland)		https://www.scopus.com/inward/record.uri?partnerID=HzOxMe3b&scp=85068908611&origin=inward	https://www.scopus.com/inward/record.uri?partnerID=HzOxMe3b&scp=85068908611&origin=inward
2	R. Sun	SSL-Net: Point-Cloud Generation Network with Self-Supervised Learning	2019	IEEE Access		https://www.scopus.com/inward/record.uri?partnerID=HzOxMe3b&scp=85068855150&origin=inward	https://www.scopus.com/inward/record.uri?partnerID=HzOxMe3b&scp=85068855150&origin=inward
2	U. Ahsan	Video jigsaw: Unsupervised learning of spatiotemporal context for video action recognition	2019	Proceedings - 2019 IEEE Winter Conference on Applications of Computer Vision, WACV 2019		https://www.scopus.com/inward/record.uri?partnerID=HzOxMe3b&scp=85063571881&origin=inward	https://www.scopus.com/inward/record.uri?partnerID=HzOxMe3b&scp=85063571881&origin=inward
2	D. Martins	Fusion of stereo and still monocular depth estimates in a self-supervised learning context	2018	Proceedings - IEEE International Conference on Robotics and Automation		https://www.scopus.com/inward/record.uri?partnerID=HzOxMe3b&scp=85063145689&origin=inward	https://www.scopus.com/inward/record.uri?partnerID=HzOxMe3b&scp=85063145689&origin=inward
2	P. Knöbelreiter	Self-supervised learning for stereo reconstruction on aerial images	2018	International Geoscience and Remote Sensing Symposium (IGARSS)		https://www.scopus.com/inward/record.uri?partnerID=HzOxMe3b&scp=85063125213&origin=inward	https://www.scopus.com/inward/record.uri?partnerID=HzOxMe3b&scp=85063125213&origin=inward
2	C. Oh	OCEAN: Object-centric arranging network for self-supervised visual representations learning	2019	Expert Systems with Applications		https://www.scopus.com/inward/record.uri?partnerID=HzOxMe3b&scp=85061306729&origin=inward	https://www.scopus.com/inward/record.uri?partnerID=HzOxMe3b&scp=85061306729&origin=inward
2	V. Stojnić	Evaluation of split-brain autoencoders for high-resolution remote sensing scene classification	2018	Proceedings Elmar - International Symposium Electronics in Marine		https://www.scopus.com/inward/record.uri?partnerID=HzOxMe3b&scp=85058709209&origin=inward	https://www.scopus.com/inward/record.uri?partnerID=HzOxMe3b&scp=85058709209&origin=inward
2	O. Wiles	Self-supervised learning of a facial attribute embedding from video	2019	British Machine Vision Conference 2018, BMVC 2018		https://www.scopus.com/inward/record.uri?partnerID=HzOxMe3b&scp=85058233657&origin=inward	https://www.scopus.com/inward/record.uri?partnerID=HzOxMe3b&scp=85058233657&origin=inward
2	X. Shu	A self-supervised learning manipulator grasping approach based on instance segmentation	2018	IEEE Access		https://www.scopus.com/inward/record.uri?partnerID=HzOxMe3b&scp=85055681019&origin=inward	https://www.scopus.com/inward/record.uri?partnerID=HzOxMe3b&scp=85055681019&origin=inward
2	Y. Zhang	Activestereonet: End-to-end self-supervised learning for active stereo systems	2018	Lecture Notes in Computer Science (including subseries Lecture Notes in Artificial Intelligence and Lecture Notes in Bioinformatics)		https://www.scopus.com/inward/record.uri?partnerID=HzOxMe3b&scp=85055441838&origin=inward	https://www.scopus.com/inward/record.uri?partnerID=HzOxMe3b&scp=85055441838&origin=inward
2	W. Ma	Single image intrinsic decomposition without a single intrinsic image	2018	Lecture Notes in Computer Science (including subseries Lecture Notes in Artificial Intelligence and Lecture Notes in Bioinformatics)		https://www.scopus.com/inward/record.uri?partnerID=HzOxMe3b&scp=85055094008&origin=inward	https://www.scopus.com/inward/record.uri?partnerID=HzOxMe3b&scp=85055094008&origin=inward
2	H. Jiang	Self-Supervised Relative Depth Learning for Urban Scene Understanding	2018	Lecture Notes in Computer Science (including subseries Lecture Notes in Artificial Intelligence and Lecture Notes in Bioinformatics)		https://www.scopus.com/inward/record.uri?partnerID=HzOxMe3b&scp=85055089742&origin=inward	https://www.scopus.com/inward/record.uri?partnerID=HzOxMe3b&scp=85055089742&origin=inward
2	K. van Hecke	Persistent self-supervised learning: From stereo to monocular vision for obstacle avoidance	2018	International Journal of Micro Air Vehicles		https://www.scopus.com/inward/record.uri?partnerID=HzOxMe3b&scp=85047097160&origin=inward	https://www.scopus.com/inward/record.uri?partnerID=HzOxMe3b&scp=85047097160&origin=inward
2	A. Mujica	Impacto de un entrenamiento en aprendizaje autorregulado en estudiantes universitarios	2017	Perfiles Educativos		https://www.scopus.com/inward/record.uri?partnerID=HzOxMe3b&scp=85043376800&origin=inward	https://www.scopus.com/inward/record.uri?partnerID=HzOxMe3b&scp=85043376800&origin=inward
2	R. Sakurai	Restoring Aspect Ratio Distortion of Natural Images with Convolutional Neural Network	2019	IEEE Transactions on Industrial Informatics		https://www.scopus.com/inward/record.uri?partnerID=HzOxMe3b&scp=85041523558&origin=inward	https://www.scopus.com/inward/record.uri?partnerID=HzOxMe3b&scp=85041523558&origin=inward
2	D. Konar	An efficient pure color image denoising using quantum parallel bidirectional self-organizing neural network architecture	2017	Quantum Inspired Computational Intelligence: Research and Applications		https://www.scopus.com/inward/record.uri?partnerID=HzOxMe3b&scp=85023167639&origin=inward	https://www.scopus.com/inward/record.uri?partnerID=HzOxMe3b&scp=85023167639&origin=inward
2	T. Mar	What Can i Do with This Tool? Self-Supervised Learning of Tool Affordances from Their 3-D Geometry	2018	IEEE Transactions on Cognitive and Developmental Systems		https://www.scopus.com/inward/record.uri?partnerID=HzOxMe3b&scp=85021806916&origin=inward	https://www.scopus.com/inward/record.uri?partnerID=HzOxMe3b&scp=85021806916&origin=inward
2	J. Shi	A novel path segmentation method for autonomous road following	2016	ICSPCC 2016 - IEEE International Conference on Signal Processing, Communications and Computing, Conference Proceedings		https://www.scopus.com/inward/record.uri?partnerID=HzOxMe3b&scp=85006915673&origin=inward	https://www.scopus.com/inward/record.uri?partnerID=HzOxMe3b&scp=85006915673&origin=inward
2	X. Dai	Adaptive terrain classification in field environment based on self-supervised learning	2015	2014 IEEE Chinese Guidance, Navigation and Control Conference, CGNCC 2014		https://www.scopus.com/inward/record.uri?partnerID=HzOxMe3b&scp=84922572074&origin=inward	https://www.scopus.com/inward/record.uri?partnerID=HzOxMe3b&scp=84922572074&origin=inward
1	J. Watson	Self-supervised monocular depth hints	2019	Proceedings of the IEEE International Conference on Computer Vision		https://www.scopus.com/inward/record.uri?partnerID=HzOxMe3b&scp=85081894438&origin=inward	https://www.scopus.com/inward/record.uri?partnerID=HzOxMe3b&scp=85081894438&origin=inward
1	Y. Chen	Self-supervised learning with geometric constraints in monocular video: Connecting flow, depth, and camera	2019	Proceedings of the IEEE International Conference on Computer Vision		https://www.scopus.com/inward/record.uri?partnerID=HzOxMe3b&scp=85081534042&origin=inward	https://www.scopus.com/inward/record.uri?partnerID=HzOxMe3b&scp=85081534042&origin=inward
1	P. Liu	Selflow: Self-supervised learning of optical flow	2019	Proceedings of the IEEE Computer Society Conference on Computer Vision and Pattern Recognition		https://www.scopus.com/inward/record.uri?partnerID=HzOxMe3b&scp=85078772709&origin=inward	https://www.scopus.com/inward/record.uri?partnerID=HzOxMe3b&scp=85078772709&origin=inward
1	C. Sun	VideoBERT: A joint model for video and language representation learning	2019	Proceedings of the IEEE International Conference on Computer Vision		https://www.scopus.com/inward/record.uri?partnerID=HzOxMe3b&scp=85078726549&origin=inward	https://www.scopus.com/inward/record.uri?partnerID=HzOxMe3b&scp=85078726549&origin=inward
1	Y. Li	Self-supervised representation learning from videos for facial action unit detection	2019	Proceedings of the IEEE Computer Society Conference on Computer Vision and Pattern Recognition		https://www.scopus.com/inward/record.uri?partnerID=HzOxMe3b&scp=85078360441&origin=inward	https://www.scopus.com/inward/record.uri?partnerID=HzOxMe3b&scp=85078360441&origin=inward
1	C. Liu	Self-Supervised Learning for Specified Latent Representation	2020	IEEE Transactions on Fuzzy Systems		https://www.scopus.com/inward/record.uri?partnerID=HzOxMe3b&scp=85077792336&origin=inward	https://www.scopus.com/inward/record.uri?partnerID=HzOxMe3b&scp=85077792336&origin=inward
1	W. Bai	Self-Supervised Learning for Cardiac MR Image Segmentation by Anatomical Position Prediction	2019	Lecture Notes in Computer Science (including subseries Lecture Notes in Artificial Intelligence and Lecture Notes in Bioinformatics)		https://www.scopus.com/inward/record.uri?partnerID=HzOxMe3b&scp=85075687751&origin=inward	https://www.scopus.com/inward/record.uri?partnerID=HzOxMe3b&scp=85075687751&origin=inward
1	H. Yu	What I see is what you see: Joint attention learning for first and third person video co-analysis	2019	MM 2019 - Proceedings of the 27th ACM International Conference on Multimedia		https://www.scopus.com/inward/record.uri?partnerID=HzOxMe3b&scp=85074849612&origin=inward	https://www.scopus.com/inward/record.uri?partnerID=HzOxMe3b&scp=85074849612&origin=inward
1	V. Röthlingshöfer	Self-supervised face-grouping on graphs	2019	MM 2019 - Proceedings of the 27th ACM International Conference on Multimedia		https://www.scopus.com/inward/record.uri?partnerID=HzOxMe3b&scp=85074841067&origin=inward	https://www.scopus.com/inward/record.uri?partnerID=HzOxMe3b&scp=85074841067&origin=inward
1	J. Chen	Intelligent Massive MIMO Antenna Selection Using Monte Carlo Tree Search	2019	IEEE Transactions on Signal Processing		https://www.scopus.com/inward/record.uri?partnerID=HzOxMe3b&scp=85074639881&origin=inward	https://www.scopus.com/inward/record.uri?partnerID=HzOxMe3b&scp=85074639881&origin=inward
1	G.A. Carpenter	Reprint of: Looking to the future: Learning from experience, averting catastrophe	2019	Neural Networks		https://www.scopus.com/inward/record.uri?partnerID=HzOxMe3b&scp=85073050460&origin=inward	https://www.scopus.com/inward/record.uri?partnerID=HzOxMe3b&scp=85073050460&origin=inward
1	X. Zhan	Self-supervised learning via conditional motion propagation	2019	Proceedings of the IEEE Computer Society Conference on Computer Vision and Pattern Recognition		https://www.scopus.com/inward/record.uri?partnerID=HzOxMe3b&scp=85072047797&origin=inward	https://www.scopus.com/inward/record.uri?partnerID=HzOxMe3b&scp=85072047797&origin=inward
1	H. Zhan	Self-supervised learning for single view depth and surface normal estimation	2019	Proceedings - IEEE International Conference on Robotics and Automation		https://www.scopus.com/inward/record.uri?partnerID=HzOxMe3b&scp=85071430160&origin=inward	https://www.scopus.com/inward/record.uri?partnerID=HzOxMe3b&scp=85071430160&origin=inward
1	L. Berscheid	Improving data efficiency of self-supervised learning for robotic grasping	2019	Proceedings - IEEE International Conference on Robotics and Automation		https://www.scopus.com/inward/record.uri?partnerID=HzOxMe3b&scp=85071413834&origin=inward	https://www.scopus.com/inward/record.uri?partnerID=HzOxMe3b&scp=85071413834&origin=inward
1	D. Harwath	Jointly Discovering Visual Objects and Spoken Words from Raw Sensory Input	2020	International Journal of Computer Vision		https://www.scopus.com/inward/record.uri?partnerID=HzOxMe3b&scp=85070231965&origin=inward	https://www.scopus.com/inward/record.uri?partnerID=HzOxMe3b&scp=85070231965&origin=inward
1	L. Chen	Self-supervised learning for medical image analysis using image context restoration	2019	Medical Image Analysis		https://www.scopus.com/inward/record.uri?partnerID=HzOxMe3b&scp=85069857337&origin=inward	https://www.scopus.com/inward/record.uri?partnerID=HzOxMe3b&scp=85069857337&origin=inward
1	S. Ye	Applications of autoencoder in reduced-order modeling of flow field	2019	Kongqi Donglixue Xuebao/Acta Aerodynamica Sinica		https://www.scopus.com/inward/record.uri?partnerID=HzOxMe3b&scp=85069671497&origin=inward	https://www.scopus.com/inward/record.uri?partnerID=HzOxMe3b&scp=85069671497&origin=inward
1	J. Qiu	Self-supervised iterative refinement learning for macular OCT volumetric data classification	2019	Computers in Biology and Medicine		https://www.scopus.com/inward/record.uri?partnerID=HzOxMe3b&scp=85068698069&origin=inward	https://www.scopus.com/inward/record.uri?partnerID=HzOxMe3b&scp=85068698069&origin=inward
1	R. Tachibana	Electronic cleansing in CT colonography using a generative adversarial network	2019	Progress in Biomedical Optics and Imaging - Proceedings of SPIE		https://www.scopus.com/inward/record.uri?partnerID=HzOxMe3b&scp=85068565126&origin=inward	https://www.scopus.com/inward/record.uri?partnerID=HzOxMe3b&scp=85068565126&origin=inward
1	G. Carpenter	Looking to the future: Learning from experience, averting catastrophe	2019	Neural Networks		https://www.scopus.com/inward/record.uri?partnerID=HzOxMe3b&scp=85068476547&origin=inward	https://www.scopus.com/inward/record.uri?partnerID=HzOxMe3b&scp=85068476547&origin=inward
1	L. Chum	Beyond Supervised Learning: A Computer Vision Perspective	2019	Journal of the Indian Institute of Science		https://www.scopus.com/inward/record.uri?partnerID=HzOxMe3b&scp=85067641554&origin=inward	https://www.scopus.com/inward/record.uri?partnerID=HzOxMe3b&scp=85067641554&origin=inward
1	Y. Shen	Brain Tumor Segmentation on MRI with Missing Modalities	2019	Lecture Notes in Computer Science (including subseries Lecture Notes in Artificial Intelligence and Lecture Notes in Bioinformatics)		https://www.scopus.com/inward/record.uri?partnerID=HzOxMe3b&scp=85066133055&origin=inward	https://www.scopus.com/inward/record.uri?partnerID=HzOxMe3b&scp=85066133055&origin=inward
1	Y. Wang	Self-Supervised Stereo Matching Algorithm Based on Common View	2019	Guangxue Xuebao/Acta Optica Sinica		https://www.scopus.com/inward/record.uri?partnerID=HzOxMe3b&scp=85063037994&origin=inward	https://www.scopus.com/inward/record.uri?partnerID=HzOxMe3b&scp=85063037994&origin=inward
1	J. Mayr	Self-Supervised Learning of the Drivable Area for Autonomous Vehicles	2018	IEEE International Conference on Intelligent Robots and Systems		https://www.scopus.com/inward/record.uri?partnerID=HzOxMe3b&scp=85063005260&origin=inward	https://www.scopus.com/inward/record.uri?partnerID=HzOxMe3b&scp=85063005260&origin=inward
1	M. Sapre	Finite element mesh smoothing using cohort intelligence	2019	Advances in Intelligent Systems and Computing		https://www.scopus.com/inward/record.uri?partnerID=HzOxMe3b&scp=85054866064&origin=inward	https://www.scopus.com/inward/record.uri?partnerID=HzOxMe3b&scp=85054866064&origin=inward
1	S. Akram	Leveraging Unlabeled Whole-Slide-Images for Mitosis Detection	2018	Lecture Notes in Computer Science (including subseries Lecture Notes in Artificial Intelligence and Lecture Notes in Bioinformatics)		https://www.scopus.com/inward/record.uri?partnerID=HzOxMe3b&scp=85053863824&origin=inward	https://www.scopus.com/inward/record.uri?partnerID=HzOxMe3b&scp=85053863824&origin=inward
1	Y. Liu	Self-supervised learning of video representation for anticipating actions in early stage	2018	IEICE Transactions on Information and Systems		https://www.scopus.com/inward/record.uri?partnerID=HzOxMe3b&scp=85046271146&origin=inward	https://www.scopus.com/inward/record.uri?partnerID=HzOxMe3b&scp=85046271146&origin=inward
1	N. Chesneau	Learning from Web Videos for Event Classification	2018	IEEE Transactions on Circuits and Systems for Video Technology		https://www.scopus.com/inward/record.uri?partnerID=HzOxMe3b&scp=85032683495&origin=inward	https://www.scopus.com/inward/record.uri?partnerID=HzOxMe3b&scp=85032683495&origin=inward
1	R. Guilherme	Context-aware switching between localisation methods for robust robot navigation: A self-supervised learning approach	2017	2016 IEEE International Conference on Systems, Man, and Cybernetics, SMC 2016 - Conference Proceedings		https://www.scopus.com/inward/record.uri?partnerID=HzOxMe3b&scp=85015792896&origin=inward	https://www.scopus.com/inward/record.uri?partnerID=HzOxMe3b&scp=85015792896&origin=inward
1	C. Yi	Self-supervised sensor learning and its application: Building 3D semantic maps using terrain classification	2014	International Journal of Distributed Sensor Networks		https://www.scopus.com/inward/record.uri?partnerID=HzOxMe3b&scp=84899936117&origin=inward	https://www.scopus.com/inward/record.uri?partnerID=HzOxMe3b&scp=84899936117&origin=inward
0	R. Tachibana	Self-supervised generative adversarial network for electronic cleansing in dual-energy CT colonography	2020	Progress in Biomedical Optics and Imaging - Proceedings of SPIE		https://www.scopus.com/inward/record.uri?partnerID=HzOxMe3b&scp=85082630247&origin=inward	https://www.scopus.com/inward/record.uri?partnerID=HzOxMe3b&scp=85082630247&origin=inward
0	K. Suzuki	Online Self-Supervised Learning for Object Picking: Detecting Optimum Grasping Position using a Metric Learning Approach	2020	Proceedings of the 2020 IEEE/SICE International Symposium on System Integration, SII 2020		https://www.scopus.com/inward/record.uri?partnerID=HzOxMe3b&scp=85082588200&origin=inward	https://www.scopus.com/inward/record.uri?partnerID=HzOxMe3b&scp=85082588200&origin=inward
0	A.J.C. Trappey	Using machine learning approach to identify synonyms for document mining	2019	Advances in Transdisciplinary Engineering		https://www.scopus.com/inward/record.uri?partnerID=HzOxMe3b&scp=85082528575&origin=inward	https://www.scopus.com/inward/record.uri?partnerID=HzOxMe3b&scp=85082528575&origin=inward
0	B.C. Song	Metric-based regularization and temporal ensemble for multi-task learning using heterogeneous unsupervised tasks	2019	Proceedings - 2019 International Conference on Computer Vision Workshop, ICCVW 2019		https://www.scopus.com/inward/record.uri?partnerID=HzOxMe3b&scp=85082498843&origin=inward	https://www.scopus.com/inward/record.uri?partnerID=HzOxMe3b&scp=85082498843&origin=inward
0	R. Imamura	Zero-shot hyperspectral image denoising with separable image prior	2019	Proceedings - 2019 International Conference on Computer Vision Workshop, ICCVW 2019		https://www.scopus.com/inward/record.uri?partnerID=HzOxMe3b&scp=85082470518&origin=inward	https://www.scopus.com/inward/record.uri?partnerID=HzOxMe3b&scp=85082470518&origin=inward
0	O. Wiles	Self-supervised learning of class embeddings from video	2019	Proceedings - 2019 International Conference on Computer Vision Workshop, ICCVW 2019		https://www.scopus.com/inward/record.uri?partnerID=HzOxMe3b&scp=85082448489&origin=inward	https://www.scopus.com/inward/record.uri?partnerID=HzOxMe3b&scp=85082448489&origin=inward
0	B. Liu	Deep metric transfer for label propagation with limited annotated data	2019	Proceedings - 2019 International Conference on Computer Vision Workshop, ICCVW 2019		https://www.scopus.com/inward/record.uri?partnerID=HzOxMe3b&scp=85082448090&origin=inward	https://www.scopus.com/inward/record.uri?partnerID=HzOxMe3b&scp=85082448090&origin=inward
0	T. Shen	Self-supervised learning of depth and motion under photometric inconsistency	2019	Proceedings - 2019 International Conference on Computer Vision Workshop, ICCVW 2019		https://www.scopus.com/inward/record.uri?partnerID=HzOxMe3b&scp=85082439411&origin=inward	https://www.scopus.com/inward/record.uri?partnerID=HzOxMe3b&scp=85082439411&origin=inward
0	T. Han	Video representation learning by dense predictive coding	2019	Proceedings - 2019 International Conference on Computer Vision Workshop, ICCVW 2019		https://www.scopus.com/inward/record.uri?partnerID=HzOxMe3b&scp=85082436812&origin=inward	https://www.scopus.com/inward/record.uri?partnerID=HzOxMe3b&scp=85082436812&origin=inward
0	J. Choi	DIFRINT: Deep iterative frame interpolation for full-frame video stabilization	2019	Proceedings - 2019 International Conference on Computer Vision Workshop, ICCVW 2019		https://www.scopus.com/inward/record.uri?partnerID=HzOxMe3b&scp=85082436586&origin=inward	https://www.scopus.com/inward/record.uri?partnerID=HzOxMe3b&scp=85082436586&origin=inward
0	S. Chen	An intelligent task offloading algorithm (iTOA) for UAV network	2019	2019 IEEE Globecom Workshops, GC Wkshps 2019 - Proceedings		https://www.scopus.com/inward/record.uri?partnerID=HzOxMe3b&scp=85082299363&origin=inward	https://www.scopus.com/inward/record.uri?partnerID=HzOxMe3b&scp=85082299363&origin=inward
0	T.B. Tran	Automatic Natural Image Colorization	2020	Lecture Notes in Computer Science (including subseries Lecture Notes in Artificial Intelligence and Lecture Notes in Bioinformatics)		https://www.scopus.com/inward/record.uri?partnerID=HzOxMe3b&scp=85082293767&origin=inward	https://www.scopus.com/inward/record.uri?partnerID=HzOxMe3b&scp=85082293767&origin=inward
0	Á.S. Hervella	Learning the retinal anatomy from scarce annotated data using self-supervised multimodal reconstruction	2020	Applied Soft Computing Journal		https://www.scopus.com/inward/record.uri?partnerID=HzOxMe3b&scp=85082165945&origin=inward	https://www.scopus.com/inward/record.uri?partnerID=HzOxMe3b&scp=85082165945&origin=inward
0	J. Hohwy	Self-supervision, normativity and the free energy principle	2020	Synthese		https://www.scopus.com/inward/record.uri?partnerID=HzOxMe3b&scp=85082112312&origin=inward	https://www.scopus.com/inward/record.uri?partnerID=HzOxMe3b&scp=85082112312&origin=inward
0	R. Gomez	Self-supervised learning from web data for multimodal retrieval	2019	Multimodal Scene Understanding: Algorithms, Applications and Deep Learning		https://www.scopus.com/inward/record.uri?partnerID=HzOxMe3b&scp=85082083832&origin=inward	https://www.scopus.com/inward/record.uri?partnerID=HzOxMe3b&scp=85082083832&origin=inward
0	Z. Feng	Self-supervised representation learning from multi-domain data	2019	Proceedings of the IEEE International Conference on Computer Vision		https://www.scopus.com/inward/record.uri?partnerID=HzOxMe3b&scp=85081922747&origin=inward	https://www.scopus.com/inward/record.uri?partnerID=HzOxMe3b&scp=85081922747&origin=inward
0	A. DIba	DynamoNet: Dynamic action and motion network	2019	Proceedings of the IEEE International Conference on Computer Vision		https://www.scopus.com/inward/record.uri?partnerID=HzOxMe3b&scp=85081919656&origin=inward	https://www.scopus.com/inward/record.uri?partnerID=HzOxMe3b&scp=85081919656&origin=inward
0	S. Gidaris	Boosting few-shot visual learning with self-supervision	2019	Proceedings of the IEEE International Conference on Computer Vision		https://www.scopus.com/inward/record.uri?partnerID=HzOxMe3b&scp=85081912080&origin=inward	https://www.scopus.com/inward/record.uri?partnerID=HzOxMe3b&scp=85081912080&origin=inward
0	P. Goyal	Scaling and benchmarking self-supervised visual representation learning	2019	Proceedings of the IEEE International Conference on Computer Vision		https://www.scopus.com/inward/record.uri?partnerID=HzOxMe3b&scp=85081896296&origin=inward	https://www.scopus.com/inward/record.uri?partnerID=HzOxMe3b&scp=85081896296&origin=inward
0	S. Li	Sequential adversarial learning for self-supervised deep visual odometry	2019	Proceedings of the IEEE International Conference on Computer Vision		https://www.scopus.com/inward/record.uri?partnerID=HzOxMe3b&scp=85081892323&origin=inward	https://www.scopus.com/inward/record.uri?partnerID=HzOxMe3b&scp=85081892323&origin=inward
0	S. Sengupta	Neural inverse rendering of an indoor scene from a single image	2019	Proceedings of the IEEE International Conference on Computer Vision		https://www.scopus.com/inward/record.uri?partnerID=HzOxMe3b&scp=85081889918&origin=inward	https://www.scopus.com/inward/record.uri?partnerID=HzOxMe3b&scp=85081889918&origin=inward
0	J. An	Grayscale images colorization with convolutional neural networks	2020	Soft Computing		https://www.scopus.com/inward/record.uri?partnerID=HzOxMe3b&scp=85081756538&origin=inward	https://www.scopus.com/inward/record.uri?partnerID=HzOxMe3b&scp=85081756538&origin=inward
0	N. Battan	DeepHuMS: Deep Human Motion Signature for 3D Skeletal Sequences	2020	Lecture Notes in Computer Science (including subseries Lecture Notes in Artificial Intelligence and Lecture Notes in Bioinformatics)		https://www.scopus.com/inward/record.uri?partnerID=HzOxMe3b&scp=85081585101&origin=inward	https://www.scopus.com/inward/record.uri?partnerID=HzOxMe3b&scp=85081585101&origin=inward
0	D. Kim	SelfSphNet: Motion Estimation of a Spherical Camera via Self-Supervised Learning	2020	IEEE Access		https://www.scopus.com/inward/record.uri?partnerID=HzOxMe3b&scp=85081543961&origin=inward	https://www.scopus.com/inward/record.uri?partnerID=HzOxMe3b&scp=85081543961&origin=inward
0	C. Lee	Position-based monocular visual servoing of an unknown target using online self-supervised learning	2019	IEEE International Conference on Intelligent Robots and Systems		https://www.scopus.com/inward/record.uri?partnerID=HzOxMe3b&scp=85081158535&origin=inward	https://www.scopus.com/inward/record.uri?partnerID=HzOxMe3b&scp=85081158535&origin=inward
0	K. Yun	Robust Human Pose Estimation for Rotation via Self-Supervised Learning	2020	IEEE Access		https://www.scopus.com/inward/record.uri?partnerID=HzOxMe3b&scp=85081096670&origin=inward	https://www.scopus.com/inward/record.uri?partnerID=HzOxMe3b&scp=85081096670&origin=inward
0	Y. Zhou	Method for estimating the image depth of tomato plant based on self-supervised learning	2019	Nongye Gongcheng Xuebao/Transactions of the Chinese Society of Agricultural Engineering		https://www.scopus.com/inward/record.uri?partnerID=HzOxMe3b&scp=85080983987&origin=inward	https://www.scopus.com/inward/record.uri?partnerID=HzOxMe3b&scp=85080983987&origin=inward
0	M. Yan	Self-Supervised Learning of State Estimation for Manipulating Deformable Linear Objects	2020	IEEE Robotics and Automation Letters		https://www.scopus.com/inward/record.uri?partnerID=HzOxMe3b&scp=85080899283&origin=inward	https://www.scopus.com/inward/record.uri?partnerID=HzOxMe3b&scp=85080899283&origin=inward
0	V. Rowtula	Towards automated evaluation of handwritten assessments	2019	Proceedings of the International Conference on Document Analysis and Recognition, ICDAR		https://www.scopus.com/inward/record.uri?partnerID=HzOxMe3b&scp=85079894727&origin=inward	https://www.scopus.com/inward/record.uri?partnerID=HzOxMe3b&scp=85079894727&origin=inward
0	S. Sen	Interpolation of regularly sampled prestack seismic data with self-supervised learning	2020	SEG International Exposition and Annual Meeting 2019		https://www.scopus.com/inward/record.uri?partnerID=HzOxMe3b&scp=85079507349&origin=inward	https://www.scopus.com/inward/record.uri?partnerID=HzOxMe3b&scp=85079507349&origin=inward
0	A. Wang	Adversarial Learning for Joint Optimization of Depth and Ego-Motion	2020	IEEE Transactions on Image Processing		https://www.scopus.com/inward/record.uri?partnerID=HzOxMe3b&scp=85079493155&origin=inward	https://www.scopus.com/inward/record.uri?partnerID=HzOxMe3b&scp=85079493155&origin=inward
0	J. Tao	Deep neural hybrid beamforming for multi-user mmwave massive MIMO system	2019	GlobalSIP 2019 - 7th IEEE Global Conference on Signal and Information Processing, Proceedings		https://www.scopus.com/inward/record.uri?partnerID=HzOxMe3b&scp=85079286103&origin=inward	https://www.scopus.com/inward/record.uri?partnerID=HzOxMe3b&scp=85079286103&origin=inward
0	Y. Endo	Animating landscape: Self-supervised learning of decoupled motion and appearance for single-image video synthesis	2019	ACM Transactions on Graphics		https://www.scopus.com/inward/record.uri?partnerID=HzOxMe3b&scp=85078912870&origin=inward	https://www.scopus.com/inward/record.uri?partnerID=HzOxMe3b&scp=85078912870&origin=inward
0	R. Aljundi	Task-free continual learning	2019	Proceedings of the IEEE Computer Society Conference on Computer Vision and Pattern Recognition		https://www.scopus.com/inward/record.uri?partnerID=HzOxMe3b&scp=85078800279&origin=inward	https://www.scopus.com/inward/record.uri?partnerID=HzOxMe3b&scp=85078800279&origin=inward
0	D. Dwibedi	Temporal cycle-consistency learning	2019	Proceedings of the IEEE Computer Society Conference on Computer Vision and Pattern Recognition		https://www.scopus.com/inward/record.uri?partnerID=HzOxMe3b&scp=85078779315&origin=inward	https://www.scopus.com/inward/record.uri?partnerID=HzOxMe3b&scp=85078779315&origin=inward
0	S. Aakur	A perceptual prediction framework for self supervised event segmentation	2019	Proceedings of the IEEE Computer Society Conference on Computer Vision and Pattern Recognition		https://www.scopus.com/inward/record.uri?partnerID=HzOxMe3b&scp=85078761116&origin=inward	https://www.scopus.com/inward/record.uri?partnerID=HzOxMe3b&scp=85078761116&origin=inward
0	W. Lee	Multi-task self-supervised object detection via recycling of bounding box annotations	2019	Proceedings of the IEEE Computer Society Conference on Computer Vision and Pattern Recognition		https://www.scopus.com/inward/record.uri?partnerID=HzOxMe3b&scp=85078748979&origin=inward	https://www.scopus.com/inward/record.uri?partnerID=HzOxMe3b&scp=85078748979&origin=inward
0	Y. Wu	Mantra-net: Manipulation tracing network for detection and localization of image forgeries with anomalous features	2019	Proceedings of the IEEE Computer Society Conference on Computer Vision and Pattern Recognition		https://www.scopus.com/inward/record.uri?partnerID=HzOxMe3b&scp=85078730374&origin=inward	https://www.scopus.com/inward/record.uri?partnerID=HzOxMe3b&scp=85078730374&origin=inward
0	A. Johnston	Single View 3D Point Cloud Reconstruction using Novel View Synthesis and Self-Supervised Depth Estimation	2019	2019 Digital Image Computing: Techniques and Applications, DICTA 2019		https://www.scopus.com/inward/record.uri?partnerID=HzOxMe3b&scp=85078701366&origin=inward	https://www.scopus.com/inward/record.uri?partnerID=HzOxMe3b&scp=85078701366&origin=inward
0	H. Cheng	Learning-based risk assessment and motion estimation by vision for unmanned aerial vehicle landing in an unvisited area	2019	Journal of Electronic Imaging		https://www.scopus.com/inward/record.uri?partnerID=HzOxMe3b&scp=85078452402&origin=inward	https://www.scopus.com/inward/record.uri?partnerID=HzOxMe3b&scp=85078452402&origin=inward
0	M. Cartwright	Tricycle: Audio representation learning from sensor network data using self-supervision	2019	IEEE Workshop on Applications of Signal Processing to Audio and Acoustics		https://www.scopus.com/inward/record.uri?partnerID=HzOxMe3b&scp=85078028335&origin=inward	https://www.scopus.com/inward/record.uri?partnerID=HzOxMe3b&scp=85078028335&origin=inward
0	L. Yu	Inpainting-Based Virtual Try-on Network for Selective Garment Transfer	2019	IEEE Access		https://www.scopus.com/inward/record.uri?partnerID=HzOxMe3b&scp=85077960270&origin=inward	https://www.scopus.com/inward/record.uri?partnerID=HzOxMe3b&scp=85077960270&origin=inward
0	H. Banville	Self-Supervised Representation Learning from Electroencephalography Signals	2019	IEEE International Workshop on Machine Learning for Signal Processing, MLSP		https://www.scopus.com/inward/record.uri?partnerID=HzOxMe3b&scp=85077707750&origin=inward	https://www.scopus.com/inward/record.uri?partnerID=HzOxMe3b&scp=85077707750&origin=inward
0	S. Zhang	Rotation Awareness Based Self-Supervised Learning for SAR Target Recognition	2019	International Geoscience and Remote Sensing Symposium (IGARSS)		https://www.scopus.com/inward/record.uri?partnerID=HzOxMe3b&scp=85077693730&origin=inward	https://www.scopus.com/inward/record.uri?partnerID=HzOxMe3b&scp=85077693730&origin=inward
0	L. Zhang	Mammographic Mass Detection by Bilateral Analysis Based on Convolution Neural Network	2019	Proceedings - International Conference on Image Processing, ICIP		https://www.scopus.com/inward/record.uri?partnerID=HzOxMe3b&scp=85076816343&origin=inward	https://www.scopus.com/inward/record.uri?partnerID=HzOxMe3b&scp=85076816343&origin=inward
0	X. Jin	Unsupervised Single Image Deraining with Self-Supervised Constraints	2019	Proceedings - International Conference on Image Processing, ICIP		https://www.scopus.com/inward/record.uri?partnerID=HzOxMe3b&scp=85076813325&origin=inward	https://www.scopus.com/inward/record.uri?partnerID=HzOxMe3b&scp=85076813325&origin=inward
0	Y. Hu	A self-supervised learning technique for road defects detection based on monocular three-dimensional reconstruction	2019	Proceedings of the ASME Design Engineering Technical Conference		https://www.scopus.com/inward/record.uri?partnerID=HzOxMe3b&scp=85076459165&origin=inward	https://www.scopus.com/inward/record.uri?partnerID=HzOxMe3b&scp=85076459165&origin=inward
0	B. Liu	A Method of Analysis on Consumer Behavior Characteristics Based on Self-supervised Learning	2019	Communications in Computer and Information Science		https://www.scopus.com/inward/record.uri?partnerID=HzOxMe3b&scp=85076220725&origin=inward	https://www.scopus.com/inward/record.uri?partnerID=HzOxMe3b&scp=85076220725&origin=inward
0	Q. Sun	Cycle-SfM: Joint self-supervised learning of depth and camera motion from monocular image sequences	2019	Chaos		https://www.scopus.com/inward/record.uri?partnerID=HzOxMe3b&scp=85076087531&origin=inward	https://www.scopus.com/inward/record.uri?partnerID=HzOxMe3b&scp=85076087531&origin=inward
0	M. Blendowski	How to Learn from Unlabeled Volume Data: Self-supervised 3D Context Feature Learning	2019	Lecture Notes in Computer Science (including subseries Lecture Notes in Artificial Intelligence and Lecture Notes in Bioinformatics)		https://www.scopus.com/inward/record.uri?partnerID=HzOxMe3b&scp=85075821543&origin=inward	https://www.scopus.com/inward/record.uri?partnerID=HzOxMe3b&scp=85075821543&origin=inward
0	O. Senouf	Self-supervised learning of inverse problem solvers in medical imaging	2019	Lecture Notes in Computer Science (including subseries Lecture Notes in Artificial Intelligence and Lecture Notes in Bioinformatics)		https://www.scopus.com/inward/record.uri?partnerID=HzOxMe3b&scp=85075697828&origin=inward	https://www.scopus.com/inward/record.uri?partnerID=HzOxMe3b&scp=85075697828&origin=inward
0		1st MICCAI Workshop on Domain Adaptation and Representation Transfer, DART 2019, and the 1st International Workshop on Medical Image Learning with Less Labels and Imperfect Data, MIL3ID 2019, held in conjunction with 22nd International Conference on Medical Image Computing and Computer- Assisted Intervention, MICCAI 2019	2019	Lecture Notes in Computer Science (including subseries Lecture Notes in Artificial Intelligence and Lecture Notes in Bioinformatics)		https://www.scopus.com/inward/record.uri?partnerID=HzOxMe3b&scp=85075679187&origin=inward	https://www.scopus.com/inward/record.uri?partnerID=HzOxMe3b&scp=85075679187&origin=inward
0		2nd International Workshop on Predictive Intelligence in Medicine, PRIME 2019, held in conjunction with the 22nd International Conference on Medical Image Computing and Computer-Assisted Intervention, MICCAI 2019	2019	Lecture Notes in Computer Science (including subseries Lecture Notes in Artificial Intelligence and Lecture Notes in Bioinformatics)		https://www.scopus.com/inward/record.uri?partnerID=HzOxMe3b&scp=85075674359&origin=inward	https://www.scopus.com/inward/record.uri?partnerID=HzOxMe3b&scp=85075674359&origin=inward
0	X. Yang	FetusMap: Fetal Pose Estimation in 3D Ultrasound	2019	Lecture Notes in Computer Science (including subseries Lecture Notes in Artificial Intelligence and Lecture Notes in Bioinformatics)		https://www.scopus.com/inward/record.uri?partnerID=HzOxMe3b&scp=85075674065&origin=inward	https://www.scopus.com/inward/record.uri?partnerID=HzOxMe3b&scp=85075674065&origin=inward
0	X. Zhuang	Self-supervised feature learning for 3d medical images by playing a rubik’s cube	2019	Lecture Notes in Computer Science (including subseries Lecture Notes in Artificial Intelligence and Lecture Notes in Bioinformatics)		https://www.scopus.com/inward/record.uri?partnerID=HzOxMe3b&scp=85075672856&origin=inward	https://www.scopus.com/inward/record.uri?partnerID=HzOxMe3b&scp=85075672856&origin=inward
0	A. Rivail	Modeling disease progression in retinal OCTs with longitudinal self-supervised learning	2019	Lecture Notes in Computer Science (including subseries Lecture Notes in Artificial Intelligence and Lecture Notes in Bioinformatics)		https://www.scopus.com/inward/record.uri?partnerID=HzOxMe3b&scp=85075663095&origin=inward	https://www.scopus.com/inward/record.uri?partnerID=HzOxMe3b&scp=85075663095&origin=inward
0	Z. Zhou	Models genesis: generic autodidactic models for 3d medical image analysis	2019	Lecture Notes in Computer Science (including subseries Lecture Notes in Artificial Intelligence and Lecture Notes in Bioinformatics)		https://www.scopus.com/inward/record.uri?partnerID=HzOxMe3b&scp=85075649311&origin=inward	https://www.scopus.com/inward/record.uri?partnerID=HzOxMe3b&scp=85075649311&origin=inward
0	D. Park	Self-supervised contextual data augmentation for natural language processing	2019	Symmetry		https://www.scopus.com/inward/record.uri?partnerID=HzOxMe3b&scp=85075510552&origin=inward	https://www.scopus.com/inward/record.uri?partnerID=HzOxMe3b&scp=85075510552&origin=inward
0	T. Maksymyuk	Intelligent framework for radio access network design	2020	Wireless Networks		https://www.scopus.com/inward/record.uri?partnerID=HzOxMe3b&scp=85075184631&origin=inward	https://www.scopus.com/inward/record.uri?partnerID=HzOxMe3b&scp=85075184631&origin=inward
0	C. Wang	Web Stereo Video Supervision for Depth Prediction from Dynamic Scenes	2019	Proceedings - 2019 International Conference on 3D Vision, 3DV 2019		https://www.scopus.com/inward/record.uri?partnerID=HzOxMe3b&scp=85075031757&origin=inward	https://www.scopus.com/inward/record.uri?partnerID=HzOxMe3b&scp=85075031757&origin=inward
0	J.H. Yoon	Learning Depth from Endoscopic Images	2019	Proceedings - 2019 International Conference on 3D Vision, 3DV 2019		https://www.scopus.com/inward/record.uri?partnerID=HzOxMe3b&scp=85074988019&origin=inward	https://www.scopus.com/inward/record.uri?partnerID=HzOxMe3b&scp=85074988019&origin=inward
0	J. Li	Self-supervised representation learning using 360<sup>◦</sup> data	2019	MM 2019 - Proceedings of the 27th ACM International Conference on Multimedia		https://www.scopus.com/inward/record.uri?partnerID=HzOxMe3b&scp=85074863322&origin=inward	https://www.scopus.com/inward/record.uri?partnerID=HzOxMe3b&scp=85074863322&origin=inward
0	Y. Man	GroundNet: Monocular ground plane normal estimation with geometric consistency	2019	MM 2019 - Proceedings of the 27th ACM International Conference on Multimedia		https://www.scopus.com/inward/record.uri?partnerID=HzOxMe3b&scp=85074838763&origin=inward	https://www.scopus.com/inward/record.uri?partnerID=HzOxMe3b&scp=85074838763&origin=inward
0	J. Wang	The retrieval of the beautiful: Self-supervised salient object detection for beauty product retrieval	2019	MM 2019 - Proceedings of the 27th ACM International Conference on Multimedia		https://www.scopus.com/inward/record.uri?partnerID=HzOxMe3b&scp=85074832605&origin=inward	https://www.scopus.com/inward/record.uri?partnerID=HzOxMe3b&scp=85074832605&origin=inward
0	A. Babadi	Self-imitation learning of locomotion movements through termination curriculum	2019	Proceedings - MIG 2019: ACM Conference on Motion, Interaction, and Games		https://www.scopus.com/inward/record.uri?partnerID=HzOxMe3b&scp=85074818712&origin=inward	https://www.scopus.com/inward/record.uri?partnerID=HzOxMe3b&scp=85074818712&origin=inward
0	S. Pascual	Learning problem-agnostic speech representations from multiple self-supervised tasks	2019	Proceedings of the Annual Conference of the International Speech Communication Association, INTERSPEECH		https://www.scopus.com/inward/record.uri?partnerID=HzOxMe3b&scp=85074701086&origin=inward	https://www.scopus.com/inward/record.uri?partnerID=HzOxMe3b&scp=85074701086&origin=inward
0	T. Stafylakis	Self-supervised speaker embeddings	2019	Proceedings of the Annual Conference of the International Speech Communication Association, INTERSPEECH		https://www.scopus.com/inward/record.uri?partnerID=HzOxMe3b&scp=85074683253&origin=inward	https://www.scopus.com/inward/record.uri?partnerID=HzOxMe3b&scp=85074683253&origin=inward
0	D. Liang	Neural State Machines for Robust Learning and Control of Neuromorphic Agents	2019	IEEE Journal on Emerging and Selected Topics in Circuits and Systems		https://www.scopus.com/inward/record.uri?partnerID=HzOxMe3b&scp=85074568059&origin=inward	https://www.scopus.com/inward/record.uri?partnerID=HzOxMe3b&scp=85074568059&origin=inward

## Sheet: cf "self-supervised learning"
2021 resulting Self-Supervised Learning paper collection as published in A. Chowdhury, J. Rosenthal, J. Waring, R. Umeton, 2021.
Review - Applied Self-Supervised Learning: Review of the State of the Art and Implementations in Medicine, 2021.
# Citations	Authors	Title	Year	Source	Publisher	ArticleURL	Link
63	Ke Gong, Xiaodan Liang, Dongyu Zhang, Xiaohui Shen, Liang Lin	Look into Person: Self-Supervised Structure-Sensitive Learning and a New Benchmark for Human Parsing	2017	2017 IEEE Conference on Computer Vision and Pattern Recognition (CVPR)	IEEE	http://dx.doi.org/10.1109/cvpr.2017.715	http://dx.doi.org/10.1109/cvpr.2017.715
46	Carl Doersch, Andrew Zisserman	Multi-task Self-Supervised Visual Learning	2017	2017 IEEE International Conference on Computer Vision (ICCV)	IEEE	http://dx.doi.org/10.1109/iccv.2017.226	http://dx.doi.org/10.1109/iccv.2017.226
34	Ayush Tewari, Michael Zollhofer, Pablo Garrido, Florian Bernard, Hyeongwoo Kim, Patrick Perez, Christian Theobalt	Self-Supervised Multi-level Face Model Learning for Monocular Reconstruction at Over 250 Hz	2018	2018 IEEE/CVF Conference on Computer Vision and Pattern Recognition	IEEE	http://dx.doi.org/10.1109/cvpr.2018.00270	http://dx.doi.org/10.1109/cvpr.2018.00270
34	Basura Fernando, Hakan Bilen, Efstratios Gavves, Stephen Gould	Self-Supervised Video Representation Learning with Odd-One-Out Networks	2017	2017 IEEE Conference on Computer Vision and Pattern Recognition (CVPR)	IEEE	http://dx.doi.org/10.1109/cvpr.2017.607	http://dx.doi.org/10.1109/cvpr.2017.607
24	Yevgen Chebotar, Karol Hausman, Zhe Su, Gaurav S. Sukhatme, Stefan Schaal	Self-supervised regrasping using spatio-temporal tactile features and reinforcement learning	2016	2016 IEEE/RSJ International Conference on Intelligent Robots and Systems (IROS)	IEEE	http://dx.doi.org/10.1109/iros.2016.7759309	http://dx.doi.org/10.1109/iros.2016.7759309
22	Gregory Kahn, Adam Villaflor, Bosen Ding, Pieter Abbeel, Sergey Levine	Self-Supervised Deep Reinforcement Learning with Generalized Computation Graphs for Robot Navigation	2018	2018 IEEE International Conference on Robotics and Automation (ICRA)	IEEE	http://dx.doi.org/10.1109/icra.2018.8460655	http://dx.doi.org/10.1109/icra.2018.8460655
22	Sangheum Hwang, Hyo-Eun Kim	Self-Transfer Learning for Weakly Supervised Lesion Localization	2016	Medical Image Computing and Computer-Assisted Intervention – MICCAI 2016	Springer International Publishing	http://dx.doi.org/10.1007/978-3-319-46723-8_28	http://dx.doi.org/10.1007/978-3-319-46723-8_28
20	Mehdi Noroozi, Ananth Vinjimoor, Paolo Favaro, Hamed Pirsiavash	Boosting Self-Supervised Learning via Knowledge Transfer	2018	2018 IEEE/CVF Conference on Computer Vision and Pattern Recognition	IEEE	http://dx.doi.org/10.1109/cvpr.2018.00975	http://dx.doi.org/10.1109/cvpr.2018.00975
20	Xiaolong Wang, Kaiming He, Abhinav Gupta	Transitive Invariance for Self-Supervised Visual Representation Learning	2017	2017 IEEE International Conference on Computer Vision (ICCV)	IEEE	http://dx.doi.org/10.1109/iccv.2017.149	http://dx.doi.org/10.1109/iccv.2017.149
18	Andy Zeng, Shuran Song, Stefan Welker, Johnny Lee, Alberto Rodriguez, Thomas Funkhouser	Learning Synergies Between Pushing and Grasping with Self-Supervised Deep Reinforcement Learning	2018	2018 IEEE/RSJ International Conference on Intelligent Robots and Systems (IROS)	IEEE	http://dx.doi.org/10.1109/iros.2018.8593986	http://dx.doi.org/10.1109/iros.2018.8593986
17	Tanis Mar, Vadim Tikhanoff, Giorgio Metta, Lorenzo Natale	Self-supervised learning of grasp dependent tool affordances on the iCub Humanoid robot	2015	2015 IEEE International Conference on Robotics and Automation (ICRA)	IEEE	http://dx.doi.org/10.1109/icra.2015.7139640	http://dx.doi.org/10.1109/icra.2015.7139640
16	Chaitanya Mitash, Kostas E. Bekris, Abdeslam Boularias	A self-supervised learning system for object detection using physics simulation and multi-view pose estimation	2017	2017 IEEE/RSJ International Conference on Intelligent Robots and Systems (IROS)	IEEE	http://dx.doi.org/10.1109/iros.2017.8202206	http://dx.doi.org/10.1109/iros.2017.8202206
15	Simon Jenni, Paolo Favaro	Self-Supervised Feature Learning by Learning to Spot Artifacts	2018	2018 IEEE/CVF Conference on Computer Vision and Pattern Recognition	IEEE	http://dx.doi.org/10.1109/cvpr.2018.00289	http://dx.doi.org/10.1109/cvpr.2018.00289
15	Lluis Gomez, Yash Patel, Marcal Rusinol, Dimosthenis Karatzas, C. V. Jawahar	Self-Supervised Learning of Visual Features through Embedding Images into Text Topic Spaces	2017	2017 IEEE Conference on Computer Vision and Pattern Recognition (CVPR)	IEEE	http://dx.doi.org/10.1109/cvpr.2017.218	http://dx.doi.org/10.1109/cvpr.2017.218
14	T. Nathan Mundhenk, Daniel Ho, Barry Y. Chen	Improvements to Context Based Self-Supervised Learning	2018	2018 IEEE/CVF Conference on Computer Vision and Pattern Recognition	IEEE	http://dx.doi.org/10.1109/cvpr.2018.00973	http://dx.doi.org/10.1109/cvpr.2018.00973
14	Pierre Sermanet, Corey Lynch, Yevgen Chebotar, Jasmine Hsu, Eric Jang, Stefan Schaal, Sergey Levine, Google Brain	Time-Contrastive Networks: Self-Supervised Learning from Video	2018	2018 IEEE International Conference on Robotics and Automation (ICRA)	IEEE	http://dx.doi.org/10.1109/icra.2018.8462891	http://dx.doi.org/10.1109/icra.2018.8462891
13	Zhongzheng Ren, Yong Jae Lee	Cross-Domain Self-Supervised Multi-task Feature Learning Using Synthetic Imagery	2018	2018 IEEE/CVF Conference on Computer Vision and Pattern Recognition	IEEE	http://dx.doi.org/10.1109/cvpr.2018.00086	http://dx.doi.org/10.1109/cvpr.2018.00086
13	Alexandros Iosifidis	Extreme learning machine based supervised subspace learning	2015	Neurocomputing	Elsevier BV	http://dx.doi.org/10.1016/j.neucom.2015.04.083	http://dx.doi.org/10.1016/j.neucom.2015.04.083
10	Ammara Masood, Adel Al- Jumaily, Khairul Anam	Self-supervised learning model for skin cancer diagnosis	2015	2015 7th International IEEE/EMBS Conference on Neural Engineering (NER)	IEEE	http://dx.doi.org/10.1109/ner.2015.7146798	http://dx.doi.org/10.1109/ner.2015.7146798
10	Chuang Gan, Boqing Gong, Kun Liu, Hao Su, Leonidas J. Guibas	Geometry Guided Convolutional Neural Networks for Self-Supervised Video Representation Learning	2018	2018 IEEE/CVF Conference on Computer Vision and Pattern Recognition	IEEE	http://dx.doi.org/10.1109/cvpr.2018.00586	http://dx.doi.org/10.1109/cvpr.2018.00586
9	Fangchang Ma, Guilherme Venturelli Cavalheiro, Sertac Karaman	Self-Supervised Sparse-to-Dense: Self-Supervised Depth Completion from LiDAR and Monocular Camera	2019	2019 International Conference on Robotics and Automation (ICRA)	IEEE	http://dx.doi.org/10.1109/icra.2019.8793637	http://dx.doi.org/10.1109/icra.2019.8793637
9	Chun-Guang Li, Zhouchen Lin, Honggang Zhang, Jun Guo	Learning Semi-Supervised Representation Towards a Unified Optimization Framework for Semi-Supervised Learning	2015	2015 IEEE International Conference on Computer Vision (ICCV)	IEEE	http://dx.doi.org/10.1109/iccv.2015.317	http://dx.doi.org/10.1109/iccv.2015.317
8	Zhao Kang, Xiao Lu, Jinfeng Yi, Zenglin Xu	Self-weighted Multiple Kernel Learning for Graph-based Clustering and Semi-supervised Classification	2018	Proceedings of the Twenty-Seventh International Joint Conference on Artificial Intelligence	International Joint Conferences on Artificial Intelligence Organization	http://dx.doi.org/10.24963/ijcai.2018/320	http://dx.doi.org/10.24963/ijcai.2018/320
8	Donghyeon Cho, Jinsun Park, Tae-Hyun Oh, Yu-Wing Tai, In So Kweon	Weakly- and Self-Supervised Learning for Content-Aware Deep Image Retargeting	2017	2017 IEEE International Conference on Computer Vision (ICCV)	IEEE	http://dx.doi.org/10.1109/iccv.2017.488	http://dx.doi.org/10.1109/iccv.2017.488
8	Dan Barnes, Will Maddern, Geoffrey Pascoe, Ingmar Posner	Driven to Distraction: Self-Supervised Distractor Learning for Robust Monocular Visual Odometry in Urban Environments	2018	2018 IEEE International Conference on Robotics and Automation (ICRA)	IEEE	http://dx.doi.org/10.1109/icra.2018.8460564	http://dx.doi.org/10.1109/icra.2018.8460564
8	Pierre Sermanet, Corey Lynch, Jasmine Hsu, Sergey Levine	Time-Contrastive Networks: Self-Supervised Learning from Multi-view Observation	2017	2017 IEEE Conference on Computer Vision and Pattern Recognition Workshops (CVPRW)	IEEE	http://dx.doi.org/10.1109/cvprw.2017.69	http://dx.doi.org/10.1109/cvprw.2017.69
7		Self-Weighted Supervised Discriminative Feature Selection	2018	IEEE Transactions on Neural Networks and Learning Systems	Institute of Electrical and Electronics Engineers (IEEE)	http://dx.doi.org/10.1109/tnnls.2017.2740341	http://dx.doi.org/10.1109/tnnls.2017.2740341
7	Mehmet Gönen	Coupled dimensionality reduction and classification for supervised and semi-supervised multilabel learning	2014	Pattern Recognition Letters	Elsevier BV	http://dx.doi.org/10.1016/j.patrec.2013.11.021	http://dx.doi.org/10.1016/j.patrec.2013.11.021
6	Omer Sumer, Tobias Dencker, Bjorn Ommer	Self-Supervised Learning of Pose Embeddings from Spatiotemporal Relations in Videos	2017	2017 IEEE International Conference on Computer Vision (ICCV)	IEEE	http://dx.doi.org/10.1109/iccv.2017.461	http://dx.doi.org/10.1109/iccv.2017.461
6	Muhammed Kocabas, Salih Karagoz, Emre Akbas	Self-Supervised Learning of 3D Human Pose Using Multi-View Geometry	2019	2019 IEEE/CVF Conference on Computer Vision and Pattern Recognition (CVPR)	IEEE	http://dx.doi.org/10.1109/cvpr.2019.00117	http://dx.doi.org/10.1109/cvpr.2019.00117
6	Tanis Mar, Vadim Tikhanoff, Giorgio Metta, Lorenzo Natale	Self-supervised learning of tool affordances from 3D tool representation through parallel SOM mapping	2017	2017 IEEE International Conference on Robotics and Automation (ICRA)	IEEE	http://dx.doi.org/10.1109/icra.2017.7989110	http://dx.doi.org/10.1109/icra.2017.7989110
5	Lorenzo Torresani	Weakly Supervised Learning	2014	Computer Vision	Springer US	http://dx.doi.org/10.1007/978-0-387-31439-6_308	http://dx.doi.org/10.1007/978-0-387-31439-6_308
5	Huaijin Chen, Jinwei Gu, Orazio Gallo, Ming-Yu Liu, Ashok Veeraraghavan, Jan Kautz	Reblur2Deblur: Deblurring videos via self-supervised learning	2018	2018 IEEE International Conference on Computational Photography (ICCP)	IEEE	http://dx.doi.org/10.1109/iccphot.2018.8368468	http://dx.doi.org/10.1109/iccphot.2018.8368468
4	Amir Jamaludin, Timor Kadir, Andrew Zisserman	Self-supervised Learning for Spinal MRIs	2017	Deep Learning in Medical Image Analysis and Multimodal Learning for Clinical Decision Support	Springer International Publishing	http://dx.doi.org/10.1007/978-3-319-67558-9_34	http://dx.doi.org/10.1007/978-3-319-67558-9_34
4	Ludovic Platon, Farida Zehraoui, Fariza Tahi	Self-organizing maps with supervised layer	2017	2017 12th International Workshop on Self-Organizing Maps and Learning Vector Quantization, Clustering and Data Visualization (WSOM)	IEEE	http://dx.doi.org/10.1109/wsom.2017.8020022	http://dx.doi.org/10.1109/wsom.2017.8020022
4	Jingkuan Song, Tao He, Hangbo Fan, Lianli Gao	Deep Discrete Hashing with Self-supervised Pairwise Labels	2017	Machine Learning and Knowledge Discovery in Databases	Springer International Publishing	http://dx.doi.org/10.1007/978-3-319-71249-9_14	http://dx.doi.org/10.1007/978-3-319-71249-9_14
4	David Novotny, Samuel Albanie, Diane Larlus, Andrea Vedaldi	Self-Supervised Learning of Geometrically Stable Features Through Probabilistic Introspection	2018	2018 IEEE/CVF Conference on Computer Vision and Pattern Recognition	IEEE	http://dx.doi.org/10.1109/cvpr.2018.00383	http://dx.doi.org/10.1109/cvpr.2018.00383
4	Dahun Kim, Donghyeon Cho, In So Kweon	Self-Supervised Video Representation Learning with Space-Time Cubic Puzzles	2019	Proceedings of the AAAI Conference on Artificial Intelligence	Association for the Advancement of Artificial Intelligence (AAAI)	http://dx.doi.org/10.1609/aaai.v33i01.33018545	http://dx.doi.org/10.1609/aaai.v33i01.33018545
3	Santiago Pascual, Mirco Ravanelli, Joan Serrà, Antonio Bonafonte, Yoshua Bengio	Learning Problem-Agnostic Speech Representations from Multiple Self-Supervised Tasks	2019	Interspeech 2019	ISCA	http://dx.doi.org/10.21437/interspeech.2019-2605	http://dx.doi.org/10.21437/interspeech.2019-2605
3	Alexander Kolesnikov, Xiaohua Zhai, Lucas Beyer	Revisiting Self-Supervised Visual Representation Learning	2019	2019 IEEE/CVF Conference on Computer Vision and Pattern Recognition (CVPR)	IEEE	http://dx.doi.org/10.1109/cvpr.2019.00202	http://dx.doi.org/10.1109/cvpr.2019.00202
3	Xiaojin Zhu	Semi-supervised Learning	2017	Encyclopedia of Machine Learning and Data Mining	Springer US	http://dx.doi.org/10.1007/978-1-4899-7687-1_749	http://dx.doi.org/10.1007/978-1-4899-7687-1_749
3	Deniz Akdemir, Jean-Luc Jannink	Ensemble learning with trees and rules: Supervised, semi-supervised, unsupervised	2014	Intelligent Data Analysis	IOS Press	http://dx.doi.org/10.3233/ida-140672	http://dx.doi.org/10.3233/ida-140672
3	Damian Pascual, Amir Aminifar, David Atienza	A Self-Learning Methodology for Epileptic Seizure Detection with Minimally-Supervised Edge Labeling	2019	2019 Design, Automation & Test in Europe Conference & Exhibition (DATE)	IEEE	http://dx.doi.org/10.23919/date.2019.8714995	http://dx.doi.org/10.23919/date.2019.8714995
3	Alexandros Kouris, Christos-Savvas Bouganis	Learning to Fly by MySelf: A Self-Supervised CNN-Based Approach for Autonomous Navigation	2018	2018 IEEE/RSJ International Conference on Intelligent Robots and Systems (IROS)	IEEE	http://dx.doi.org/10.1109/iros.2018.8594204	http://dx.doi.org/10.1109/iros.2018.8594204
2	Priya Goyal, Dhruv Mahajan, Abhinav Gupta, Ishan Misra	Scaling and Benchmarking Self-Supervised Visual Representation Learning	2019	2019 IEEE/CVF International Conference on Computer Vision (ICCV)	IEEE	http://dx.doi.org/10.1109/iccv.2019.00649	http://dx.doi.org/10.1109/iccv.2019.00649
2	Adithyavairavan Murali, Lerrel Pinto, Dhiraj Gandhi, Abhinav Gupta	CASSL: Curriculum Accelerated Self-Supervised Learning	2018	2018 IEEE International Conference on Robotics and Automation (ICRA)	IEEE	http://dx.doi.org/10.1109/icra.2018.8463147	http://dx.doi.org/10.1109/icra.2018.8463147
2	Pengpeng Liu, Michael Lyu, Irwin King, Jia Xu	SelFlow: Self-Supervised Learning of Optical Flow	2019	2019 IEEE/CVF Conference on Computer Vision and Pattern Recognition (CVPR)	IEEE	http://dx.doi.org/10.1109/cvpr.2019.00470	http://dx.doi.org/10.1109/cvpr.2019.00470
2		Supervised Learning	2017	Encyclopedia of Machine Learning and Data Mining	Springer US	http://dx.doi.org/10.1007/978-1-4899-7687-1_803	http://dx.doi.org/10.1007/978-1-4899-7687-1_803
2	Álvaro Figueira, Luciana Oliveira	Analyzing Social Media Discourse - An Approach using Semi-supervised Learning	2016	Proceedings of the 12th International Conference on Web Information Systems and Technologies	SCITEPRESS - Science and and Technology Publications	http://dx.doi.org/10.5220/0005786601880195	http://dx.doi.org/10.5220/0005786601880195
2	Rong Duan, Olivia Hong, Guangqin Ma	Semi-Supervised Learning in Inferring Mobile Device Locations	2014	Quality and Reliability Engineering International	Wiley	http://dx.doi.org/10.1002/qre.1701	http://dx.doi.org/10.1002/qre.1701
2	Liming Han, Yimin Lin, Guoguang Du, Shiguo Lian	DeepVIO: Self-supervised Deep Learning of Monocular Visual Inertial Odometry using 3D Geometric Constraints	2019	2019 IEEE/RSJ International Conference on Intelligent Robots and Systems (IROS)	IEEE	http://dx.doi.org/10.1109/iros40897.2019.8968467	http://dx.doi.org/10.1109/iros40897.2019.8968467
2	Chenrui Zhang, Yuxin Peng	Better and Faster: Knowledge Transfer from Multiple Self-supervised Learning Tasks via Graph Distillation for Video Classification	2018	Proceedings of the Twenty-Seventh International Joint Conference on Artificial Intelligence	International Joint Conferences on Artificial Intelligence Organization	http://dx.doi.org/10.24963/ijcai.2018/158	http://dx.doi.org/10.24963/ijcai.2018/158
2	Pengyue Zhang, Fusheng Wang, Yefeng Zheng	Self supervised deep representation learning for fine-grained body part recognition	2017	2017 IEEE 14th International Symposium on Biomedical Imaging (ISBI 2017)	IEEE	http://dx.doi.org/10.1109/isbi.2017.7950587	http://dx.doi.org/10.1109/isbi.2017.7950587
2	Stamatis Karlos, Nikos Fazakis, Sotiris Kotsiantis, Kyriakos Sgarbas	Self-Trained Stacking Model for Semi-Supervised Learning	2017	International Journal on Artificial Intelligence Tools	World Scientific Pub Co Pte Lt	http://dx.doi.org/10.1142/s0218213017500014	http://dx.doi.org/10.1142/s0218213017500014
1	Lucas Beyer, Xiaohua Zhai, Avital Oliver, Alexander Kolesnikov	S4L: Self-Supervised Semi-Supervised Learning	2019	2019 IEEE/CVF International Conference on Computer Vision (ICCV)	IEEE	http://dx.doi.org/10.1109/iccv.2019.00156	http://dx.doi.org/10.1109/iccv.2019.00156
1	Fazakis, Kanas, Aridas, Karlos, Kotsiantis	Combination of Active Learning and Semi-Supervised Learning under a Self-Training Scheme	2019	Entropy	MDPI AG	http://dx.doi.org/10.3390/e21100988	http://dx.doi.org/10.3390/e21100988
1	Ben. G. Weinstein, Sergio Marconi, Stephanie Bohlman, Alina Zare, Ethan White	Individual tree-crown detection in RGB imagery using self-supervised deep learning neural networks	2019		Cold Spring Harbor Laboratory	http://dx.doi.org/10.1101/532952	http://dx.doi.org/10.1101/532952
1	Binghui Chen, Weihong Deng	Weakly-supervised deep self-learning for face recognition	2016	2016 IEEE International Conference on Multimedia and Expo (ICME)	IEEE	http://dx.doi.org/10.1109/icme.2016.7552983	http://dx.doi.org/10.1109/icme.2016.7552983
1	Panos Athanasopoulos, Daniel Albright	A Perceptual Learning Approach to the Whorfian Hypothesis: Supervised Classification of Motion	2016	Language Learning	Wiley	http://dx.doi.org/10.1111/lang.12180	http://dx.doi.org/10.1111/lang.12180
1	Dian I. Martin, Michael W. Berry, John C. Martin	Semantic Unsupervised Learning for Word Sense Disambiguation	2019	Unsupervised and Semi-Supervised Learning	Springer International Publishing	http://dx.doi.org/10.1007/978-3-030-22475-2_6	http://dx.doi.org/10.1007/978-3-030-22475-2_6
1	Bassam A. Almogahed, Ioannis A. Kakadiaris	Empowering Imbalanced Data in Supervised Learning: A Semi-supervised Learning Approach	2014	Artificial Neural Networks and Machine Learning – ICANN 2014	Springer International Publishing	http://dx.doi.org/10.1007/978-3-319-11179-7_66	http://dx.doi.org/10.1007/978-3-319-11179-7_66
1	Takashi Fujii, Hidetaka Ito, Seiji Miyoshi	Statistical-Mechanical Analysis Connecting Supervised Learning and Semi-Supervised Learning	2017	Journal of the Physical Society of Japan	Physical Society of Japan	http://dx.doi.org/10.7566/jpsj.86.063801	http://dx.doi.org/10.7566/jpsj.86.063801
1	Long Yi, Yijie Shi	Research on abnormal traffic classification of web camera based on supervised learning and semi — Supervised learning	2017	2017 3rd IEEE International Conference on Computer and Communications (ICCC)	IEEE	http://dx.doi.org/10.1109/compcomm.2017.8322605	http://dx.doi.org/10.1109/compcomm.2017.8322605
1	Avrim Blum	Semi-supervised Learning	2014	Encyclopedia of Algorithms	Springer US	http://dx.doi.org/10.1007/978-3-642-27848-8_766-1	http://dx.doi.org/10.1007/978-3-642-27848-8_766-1
1	Steven Janosik	Learning Through Supervised Practice in Student Affairs	2014		Routledge	http://dx.doi.org/10.4324/9780203113462	http://dx.doi.org/10.4324/9780203113462
1	Paul D. McNicholas, Peter A. Tait	Supervised Learning	2019	Data Science with Julia	Chapman and Hall/CRC	http://dx.doi.org/10.1201/9781351013673-5	http://dx.doi.org/10.1201/9781351013673-5
1	Huangying Zhan, Chamara Saroj Weerasekera, Ravi Garg, Ian Reid	Self-supervised Learning for Single View Depth and Surface Normal Estimation	2019	2019 International Conference on Robotics and Automation (ICRA)	IEEE	http://dx.doi.org/10.1109/icra.2019.8793984	http://dx.doi.org/10.1109/icra.2019.8793984
1	Liang Chen, Paul Bentley, Kensaku Mori, Kazunari Misawa, Michitaka Fujiwara, Daniel Rueckert	Self-supervised learning for medical image analysis using image context restoration	2019	Medical Image Analysis	Elsevier BV	http://dx.doi.org/10.1016/j.media.2019.101539	http://dx.doi.org/10.1016/j.media.2019.101539
1	Robert Dupre, Jiri Fajtl, Vasileios Argyriou, Paolo Remagnino	Improving Dataset Volumes and Model Accuracy With Semi-Supervised Iterative Self-Learning	2020	IEEE Transactions on Image Processing	Institute of Electrical and Electronics Engineers (IEEE)	http://dx.doi.org/10.1109/tip.2019.2913986	http://dx.doi.org/10.1109/tip.2019.2913986
1	Xiaofang Dai, Shulun Li, Fengchi Sun	Adaptive terrain classification in field environment based on self-supervised learning	2014	Proceedings of 2014 IEEE Chinese Guidance, Navigation and Control Conference	IEEE	http://dx.doi.org/10.1109/cgncc.2014.7007211	http://dx.doi.org/10.1109/cgncc.2014.7007211
1	Alvaro S. Hervella, Jose Rouco, Jorge Novo, Marcos Ortega	Self-Supervised Deep Learning for Retinal Vessel Segmentation Using Automatically Generated Labels from Multimodal Data	2019	2019 International Joint Conference on Neural Networks (IJCNN)	IEEE	http://dx.doi.org/10.1109/ijcnn.2019.8851844	http://dx.doi.org/10.1109/ijcnn.2019.8851844
1	H.W. Ho, C. De Wagter, B.D.W Remes, G.C.H.E. de Croon	Optical flow for self-supervised learning of obstacle appearance	2015	2015 IEEE/RSJ International Conference on Intelligent Robots and Systems (IROS)	IEEE	http://dx.doi.org/10.1109/iros.2015.7353805	http://dx.doi.org/10.1109/iros.2015.7353805
1	Jakob Mayr, Christian Unger, Federico Tombari	Self-Supervised Learning of the Drivable Area for Autonomous Vehicles	2018	2018 IEEE/RSJ International Conference on Intelligent Robots and Systems (IROS)	IEEE	http://dx.doi.org/10.1109/iros.2018.8594480	http://dx.doi.org/10.1109/iros.2018.8594480
1	Chengze Wang, Yuan Yuan, Qi Wang	Learning by Inertia: Self-supervised Monocular Visual Odometry for Road Vehicles	2019	ICASSP 2019 - 2019 IEEE International Conference on Acoustics, Speech and Signal Processing (ICASSP)	IEEE	http://dx.doi.org/10.1109/icassp.2019.8683446	http://dx.doi.org/10.1109/icassp.2019.8683446
1	Diogo Martins, Kevin Van Hecke, Guido De Croon	Fusion of Stereo and Still Monocular Depth Estimates in a Self-Supervised Learning Context	2018	2018 IEEE International Conference on Robotics and Automation (ICRA)	IEEE	http://dx.doi.org/10.1109/icra.2018.8461116	http://dx.doi.org/10.1109/icra.2018.8461116
1	Hong Wang, Xin Wang, Wenhan Xiong, Mo Yu, Xiaoxiao Guo, Shiyu Chang, William Yang Wang	Self-Supervised Learning for Contextualized Extractive Summarization	2019	Proceedings of the 57th Annual Meeting of the Association for Computational Linguistics	Association for Computational Linguistics	http://dx.doi.org/10.18653/v1/p19-1214	http://dx.doi.org/10.18653/v1/p19-1214
1	Vivek Sharma, Makarand Tapaswi, M. Saquib Sarfraz, Rainer Stiefelhagen	Self-Supervised Learning of Face Representations for Video Face Clustering	2019	2019 14th IEEE International Conference on Automatic Face & Gesture Recognition (FG 2019)	IEEE	http://dx.doi.org/10.1109/fg.2019.8756609	http://dx.doi.org/10.1109/fg.2019.8756609
1	Dejing Xu, Jun Xiao, Zhou Zhao, Jian Shao, Di Xie, Yueting Zhuang	Self-Supervised Spatiotemporal Learning via Video Clip Order Prediction	2019	2019 IEEE/CVF Conference on Computer Vision and Pattern Recognition (CVPR)	IEEE	http://dx.doi.org/10.1109/cvpr.2019.01058	http://dx.doi.org/10.1109/cvpr.2019.01058
1	Yujin Chen, Zhigang Tu, Liuhao Ge, Dejun Zhang, Ruizhi Chen, Junsong Yuan	SO-HandNet: Self-Organizing Network for 3D Hand Pose Estimation With Semi-Supervised Learning	2019	2019 IEEE/CVF International Conference on Computer Vision (ICCV)	IEEE	http://dx.doi.org/10.1109/iccv.2019.00706	http://dx.doi.org/10.1109/iccv.2019.00706
0	Jisoo Jeong, Seungeui Lee, Nojun Kwak	Self-Training using Selection Network for Semi-supervised Learning	2020	Proceedings of the 9th International Conference on Pattern Recognition Applications and Methods	SCITEPRESS - Science and Technology Publications	http://dx.doi.org/10.5220/0008940900230032	http://dx.doi.org/10.5220/0008940900230032
0	kanji tanaka	Self-Supervised Learning and Network Architecture Search for Domain-Adaptive Landmark Detector	2020		Center for Open Science	http://dx.doi.org/10.31224/osf.io/26xnj	http://dx.doi.org/10.31224/osf.io/26xnj
0	kanji tanaka	Self-Supervised Learning and Network Architecture Search for Domain-Adaptive Landmark Detector	2020		Center for Open Science	http://dx.doi.org/10.31219/osf.io/45pq7	http://dx.doi.org/10.31219/osf.io/45pq7
0	Mark Hoogendoorn, Burkhardt Funk	Mathematical Foundations for Supervised Learning	2017	Machine Learning for the Quantified Self	Springer International Publishing	http://dx.doi.org/10.1007/978-3-319-66308-1_6	http://dx.doi.org/10.1007/978-3-319-66308-1_6
0	Mohammad Sabokrou, Mohammad Khalooei, Ehsan Adeli	Self-Supervised Representation Learning via Neighborhood-Relational Encoding	2019	2019 IEEE/CVF International Conference on Computer Vision (ICCV)	IEEE	http://dx.doi.org/10.1109/iccv.2019.00810	http://dx.doi.org/10.1109/iccv.2019.00810
0	Richard de Groof, Iren Valova	Genetically Supervised Self-Organizing Map for the Classification of Glass Samples	2014	2014 13th International Conference on Machine Learning and Applications	IEEE	http://dx.doi.org/10.1109/icmla.2014.46	http://dx.doi.org/10.1109/icmla.2014.46
0	Jiawei Wu, Xin Wang, William Yang Wang	Self-Supervised Dialogue Learning	2019	Proceedings of the 57th Annual Meeting of the Association for Computational Linguistics	Association for Computational Linguistics	http://dx.doi.org/10.18653/v1/p19-1375	http://dx.doi.org/10.18653/v1/p19-1375
0	Sri Ratna Wulan, Suhono Harso Supangkat	Semi-supervised learning self-training for Indonesian motivational messages classification	2017	2017 International Conference on ICT For Smart Society (ICISS)	IEEE	http://dx.doi.org/10.1109/ictss.2017.8288888	http://dx.doi.org/10.1109/ictss.2017.8288888
0	Bhoram Lee, Daniel D. Lee	Self-supervised online learning of appearance for 3D tracking	2017	2017 IEEE/RSJ International Conference on Intelligent Robots and Systems (IROS)	IEEE	http://dx.doi.org/10.1109/iros.2017.8206373	http://dx.doi.org/10.1109/iros.2017.8206373
0	Olivia Wiles, A. Sophia Koepke, Andrew Zisserman	Self-Supervised Learning of Class Embeddings from Video	2019	2019 IEEE/CVF International Conference on Computer Vision Workshop (ICCVW)	IEEE	http://dx.doi.org/10.1109/iccvw.2019.00364	http://dx.doi.org/10.1109/iccvw.2019.00364
0	Marc Szafraniec, Gautier Marti, Philippe Donnat	Putting Self-Supervised Token Embedding on the Tables	2017	2017 16th IEEE International Conference on Machine Learning and Applications (ICMLA)	IEEE	http://dx.doi.org/10.1109/icmla.2017.00-77	http://dx.doi.org/10.1109/icmla.2017.00-77
0	Patrick Knobelreiter, Christoph Vogel, Thomas Pock	Self-Supervised Learning for Stereo Reconstruction on Aerial Images	2018	IGARSS 2018 - 2018 IEEE International Geoscience and Remote Sensing Symposium	IEEE	http://dx.doi.org/10.1109/igarss.2018.8518316	http://dx.doi.org/10.1109/igarss.2018.8518316
0	Zeyu Feng, Chang Xu, Dacheng Tao	Self-Supervised Representation Learning by Rotation Feature Decoupling	2019	2019 IEEE/CVF Conference on Computer Vision and Pattern Recognition (CVPR)	IEEE	http://dx.doi.org/10.1109/cvpr.2019.01061	http://dx.doi.org/10.1109/cvpr.2019.01061
0		A New State of Health Diagnosis Method Utilizing Self-Supervised Deep Learning Via Virtual Tests	2019	ECS Meeting Abstracts	The Electrochemical Society	http://dx.doi.org/10.1149/ma2019-02/5/419	http://dx.doi.org/10.1149/ma2019-02/5/419
0	Zeyu Feng, Chang Xu, Dacheng Tao	Self-Supervised Representation Learning From Multi-Domain Data	2019	2019 IEEE/CVF International Conference on Computer Vision (ICCV)	IEEE	http://dx.doi.org/10.1109/iccv.2019.00334	http://dx.doi.org/10.1109/iccv.2019.00334
0	Raul Gomez, Lluis Gomez, Jaume Gibert, Dimosthenis Karatzas	Self-Supervised Learning from Web Data for Multimodal Retrieval	2019	Multimodal Scene Understanding	Elsevier	http://dx.doi.org/10.1016/b978-0-12-817358-9.00015-9	http://dx.doi.org/10.1016/b978-0-12-817358-9.00015-9
0	Changjae Oh, Andrea Cavallaro	Learning Action Representations for Self-supervised Visual Exploration	2019	2019 International Conference on Robotics and Automation (ICRA)	IEEE	http://dx.doi.org/10.1109/icra.2019.8794401	http://dx.doi.org/10.1109/icra.2019.8794401
0	Lars Berscheid, Thomas Ruhr, Torsten Kroger	Improving Data Efficiency of Self-supervised Learning for Robotic Grasping	2019	2019 International Conference on Robotics and Automation (ICRA)	IEEE	http://dx.doi.org/10.1109/icra.2019.8793952	http://dx.doi.org/10.1109/icra.2019.8793952
0	Pritam Sarkar, Ali Etemad	Self-Supervised Learning for ECG-Based Emotion Recognition	2020	ICASSP 2020 - 2020 IEEE International Conference on Acoustics, Speech and Signal Processing (ICASSP)	IEEE	http://dx.doi.org/10.1109/icassp40776.2020.9053985	http://dx.doi.org/10.1109/icassp40776.2020.9053985
0	Thiago Henrique Cupertino, Liang Zhao	Attraction Forces Based Semi-Supervised Learning	2016	Anais do 10. Congresso Brasileiro de Inteligência Computacional	SBIC	http://dx.doi.org/10.21528/cbic2011-23.6	http://dx.doi.org/10.21528/cbic2011-23.6
0	Atair Rios Neto	Stochastic Parameter Estimation Neural Nets Supervised Learning Approach	2016	Anais do 1. Congresso Brasileiro de Redes Neurais	CNRN	http://dx.doi.org/10.21528/cbrn1994-010	http://dx.doi.org/10.21528/cbrn1994-010
0	Michael W. Berry, Azlinah Mohamed, Bee Wah Yap	Supervised and Unsupervised Learning for Data Science	2020	Unsupervised and Semi-Supervised Learning	Springer International Publishing	http://dx.doi.org/10.1007/978-3-030-22475-2	http://dx.doi.org/10.1007/978-3-030-22475-2
0	Xiaomeng Xin, Xindi Wu, Yuechen Wang, Jinjun Wang	Deep Self-Paced Learning for Semi-Supervised Person Re-Identification Using Multi-View Self-Paced Clustering	2019	2019 IEEE International Conference on Image Processing (ICIP)	IEEE	http://dx.doi.org/10.1109/icip.2019.8803290	http://dx.doi.org/10.1109/icip.2019.8803290
0	Furqan Ahmed	Self-Organization: A Perspective on Applications in the Internet of Things	2018	Natural Computing for Unsupervised Learning	Springer International Publishing	http://dx.doi.org/10.1007/978-3-319-98566-4_3	http://dx.doi.org/10.1007/978-3-319-98566-4_3
0	Niwat Srisawasdi, Patcharin Panjaburee	A Development of Supervised-Online Personal Learning Environment: Examining Factors Affecting Self-Directed Learning and Conceptual Understanding Progression	2017	2017 6th IIAI International Congress on Advanced Applied Informatics (IIAI-AAI)	IEEE	http://dx.doi.org/10.1109/iiai-aai.2017.67	http://dx.doi.org/10.1109/iiai-aai.2017.67
0	Yuanqing Huang, Yingping Chen, D. Brian Ma	18.1 A Self-Health-Learning GaN Power Converter Using On-Die Logarithm-Based Analog SGD Supervised Learning and Online Tj-Independent Precursor Measurement	2020	2020 IEEE International Solid- State Circuits Conference - (ISSCC)	IEEE	http://dx.doi.org/10.1109/isscc19947.2020.9062999	http://dx.doi.org/10.1109/isscc19947.2020.9062999
0	Ningxin Shi, Xiaohong Yuan, Joaquin Hernandez, Kaushik Roy, Albert Esterline	Self-Learning Semi-Supervised Machine Learning for Network Intrusion Detection	2018	2018 International Conference on Computational Science and Computational Intelligence (CSCI)	IEEE	http://dx.doi.org/10.1109/csci46756.2018.00019	http://dx.doi.org/10.1109/csci46756.2018.00019
0	Hubert Banville, Isabela Albuquerque, Aapo Hyvarinen, Graeme Moffat, Denis-Alexander Engemann, Alexandre Gramfort	Self-Supervised Representation Learning from Electroencephalography Signals	2019	2019 IEEE 29th International Workshop on Machine Learning for Signal Processing (MLSP)	IEEE	http://dx.doi.org/10.1109/mlsp.2019.8918693	http://dx.doi.org/10.1109/mlsp.2019.8918693
0	Kanata Suzuki, Yasuto Yokota, Yuzi Kanazawa, Tomoyoshi Takebayashi	Online Self-Supervised Learning for Object Picking: Detecting Optimum Grasping Position using a Metric Learning Approach	2020	2020 IEEE/SICE International Symposium on System Integration (SII)	IEEE	http://dx.doi.org/10.1109/sii46433.2020.9025845	http://dx.doi.org/10.1109/sii46433.2020.9025845
0	Liang Lin, Dongyu Zhang, Ping Luo, Wangmeng Zuo	Self-supervised Structure-Sensitive Learning for Human Parsing	2019	Human Centric Visual Analysis with Deep Learning	Springer Singapore	http://dx.doi.org/10.1007/978-981-13-2387-4_5	http://dx.doi.org/10.1007/978-981-13-2387-4_5
0		Supervised Learning-Classification Using Logistic Regression	2019	Python® Machine Learning	John Wiley & Sons, Inc.	http://dx.doi.org/10.1002/9781119557500.ch7	http://dx.doi.org/10.1002/9781119557500.ch7
0		Supervised Learning-Linear Regression	2019	Python® Machine Learning	John Wiley & Sons, Inc.	http://dx.doi.org/10.1002/9781119557500.ch6	http://dx.doi.org/10.1002/9781119557500.ch6
0		Supervised Learning-Classification Using K-Nearest Neighbors (KNN)	2019	Python® Machine Learning	John Wiley & Sons, Inc.	http://dx.doi.org/10.1002/9781119557500.ch9	http://dx.doi.org/10.1002/9781119557500.ch9
0		Supervised Learning-Classification Using Support Vector Machines	2019	Python® Machine Learning	John Wiley & Sons, Inc.	http://dx.doi.org/10.1002/9781119557500.ch8	http://dx.doi.org/10.1002/9781119557500.ch8
0		8. Lie group semi–supervised learning	2018	Lie Group Machine Learning	De Gruyter	http://dx.doi.org/10.1515/9783110499506-008	http://dx.doi.org/10.1515/9783110499506-008
0	Rakesh M. Verma, David J. Marchette	Machine Learning – Supervised Learning	2019	Cybersecurity Analytics	Chapman and Hall/CRC	http://dx.doi.org/10.1201/9780429326813-6	http://dx.doi.org/10.1201/9780429326813-6
0	Peter Wlodarczak	Semi-supervised Learning	2019	Machine Learning and its Applications	CRC Press	http://dx.doi.org/10.1201/9780429448782-7	http://dx.doi.org/10.1201/9780429448782-7
0	Peter Wlodarczak	Supervised Learning	2019	Machine Learning and its Applications	CRC Press	http://dx.doi.org/10.1201/9780429448782-4	http://dx.doi.org/10.1201/9780429448782-4
0	Peter Wittek	Supervised Learning and Support Vector Machines	2014	Quantum Machine Learning	Elsevier	http://dx.doi.org/10.1016/b978-0-12-800953-6.00007-4	http://dx.doi.org/10.1016/b978-0-12-800953-6.00007-4
0	Prafull Sharma, Yingbo Li	Self-Supervised Contextual Keyword and Keyphrase Retrieval with Self-Labelling	2019		MDPI AG	http://dx.doi.org/10.20944/preprints201908.0073.v1	http://dx.doi.org/10.20944/preprints201908.0073.v1
0	Wataru Shimoda, Keiji Yanai	Self-Supervised Difference Detection for Weakly-Supervised Semantic Segmentation	2019	2019 IEEE/CVF International Conference on Computer Vision (ICCV)	IEEE	http://dx.doi.org/10.1109/iccv.2019.00531	http://dx.doi.org/10.1109/iccv.2019.00531
0	Mohamed Alloghani, Dhiya Al-Jumeily, Jamila Mustafina, Abir Hussain, Ahmed J. Aljaaf	A Systematic Review on Supervised and Unsupervised Machine Learning Algorithms for Data Science	2019	Unsupervised and Semi-Supervised Learning	Springer International Publishing	http://dx.doi.org/10.1007/978-3-030-22475-2_1	http://dx.doi.org/10.1007/978-3-030-22475-2_1
0	Joydeep Bhattacharjee	Supervised Learning	2019	Practical Machine Learning with Rust	Apress	http://dx.doi.org/10.1007/978-1-4842-5121-8_2	http://dx.doi.org/10.1007/978-1-4842-5121-8_2
0		Supervised Learning on Text Data	2017	Encyclopedia of Machine Learning and Data Mining	Springer US	http://dx.doi.org/10.1007/978-1-4899-7687-1_100456	http://dx.doi.org/10.1007/978-1-4899-7687-1_100456
0	Thiago Christiano Silva, Liang Zhao	Network-Based Supervised Learning	2016	Machine Learning in Complex Networks	Springer International Publishing	http://dx.doi.org/10.1007/978-3-319-17290-3_5	http://dx.doi.org/10.1007/978-3-319-17290-3_5
0	Shiliang Sun, Liang Mao, Ziang Dong, Lidan Wu	Multiview Supervised Learning	2019	Multiview Machine Learning	Springer Singapore	http://dx.doi.org/10.1007/978-981-13-3029-2_4	http://dx.doi.org/10.1007/978-981-13-3029-2_4
0		Analysis of Intensive Learning and Supervised Learning	2018	Academic Journal of Computing & Information Science	Francis Academic Press Ltd.	http://dx.doi.org/10.25236/ajcis.010008	http://dx.doi.org/10.25236/ajcis.010008
0		Supervised Dictionary Learning via Semantic Embedding	2015	Learning-Based Local Visual Representation and Indexing	Elsevier	http://dx.doi.org/10.1016/b978-0-12-802409-6.00004-2	http://dx.doi.org/10.1016/b978-0-12-802409-6.00004-2
0		5. Semi-supervised multi-task learning based on dynamic fuzzy sets	2017	Dynamic Fuzzy Machine Learning	De Gruyter	http://dx.doi.org/10.1515/9783110520651-005	http://dx.doi.org/10.1515/9783110520651-005
0		A Brief Review of Supervised Learning	2014	Multi-Agent Machine Learning	John Wiley & Sons, Inc.	http://dx.doi.org/10.1002/9781118884614.ch1	http://dx.doi.org/10.1002/9781118884614.ch1
0	Harold Szu	FPGA firmware helps unify the supervised and un-supervised deep learning for BDA	2019	MOJ Applied Bionics and Biomechanics	MedCrave Group, LLC	http://dx.doi.org/10.15406/mojabb.2019.03.00108	http://dx.doi.org/10.15406/mojabb.2019.03.00108
0	Rakibul Hassan, Md. Rabiul Islam	Detection of fake online reviews using semi-supervised and supervised learning	2019	2019 International Conference on Electrical, Computer and Communication Engineering (ECCE)	IEEE	http://dx.doi.org/10.1109/ecace.2019.8679186	http://dx.doi.org/10.1109/ecace.2019.8679186
0	Frédéric Ros, Serge Guillaume	Sampling Techniques for Supervised or Unsupervised Tasks	2020	Unsupervised and Semi-Supervised Learning	Springer International Publishing	http://dx.doi.org/10.1007/978-3-030-29349-9	http://dx.doi.org/10.1007/978-3-030-29349-9
0	Dan Feldman	Core-Sets: Updated Survey	2019	Sampling Techniques for Supervised or Unsupervised Tasks	Springer International Publishing	http://dx.doi.org/10.1007/978-3-030-29349-9_2	http://dx.doi.org/10.1007/978-3-030-29349-9_2
0	Guillaume Chauvet	Introduction to Sampling Techniques	2019	Sampling Techniques for Supervised or Unsupervised Tasks	Springer International Publishing	http://dx.doi.org/10.1007/978-3-030-29349-9_1	http://dx.doi.org/10.1007/978-3-030-29349-9_1
0	Harsh S. Dhiman, Dipankar Deb, Valentina Emilia Balas	Supervised learning for forecasting in presence of wind wakes	2020	Supervised Machine Learning in Wind Forecasting and Ramp Event Prediction	Elsevier	http://dx.doi.org/10.1016/b978-0-12-821353-7.00019-3	http://dx.doi.org/10.1016/b978-0-12-821353-7.00019-3
0	Harsh S. Dhiman, Dipankar Deb, Valentina Emilia Balas	Supervised machine learning models based on support vector regression	2020	Supervised Machine Learning in Wind Forecasting and Ramp Event Prediction	Elsevier	http://dx.doi.org/10.1016/b978-0-12-821353-7.00015-6	http://dx.doi.org/10.1016/b978-0-12-821353-7.00015-6
0		An Insight Into Supervised Learning Using Support Vector Machines	2017	International Journal of Recent Trends in Engineering and Research	International Journal of Recent Trends in Engineering and Research	http://dx.doi.org/10.23883/ijrter.2017.3391.mezpj	http://dx.doi.org/10.23883/ijrter.2017.3391.mezpj
0	Jorge López, Andrey Laputenko, Natalia Kushik, Nina Yevtushenko, Stanislav N. Torgaev	Scalable Supervised Machine Learning Apparatus for Computationally Constrained Devices	2018	Proceedings of the 13th International Conference on Software Technologies	SCITEPRESS - Science and Technology Publications	http://dx.doi.org/10.5220/0006908905180528	http://dx.doi.org/10.5220/0006908905180528
0	Deepak Ranoji Naik, Dr. Satish R Todmal	Intelligent Web Crawler by Supervised Learning	2018	Journal of Advances and Scholarly Researches in Allied Education	Ignited Minds Pvt. Ltd.	http://dx.doi.org/10.29070/15/57336	http://dx.doi.org/10.29070/15/57336
0	Jorge López, Andrey Laputenko, Natalia Kushik, Nina Yevtushenko, Stanislav N. Torgaev	Scalable Supervised Machine Learning Apparatus for Computationally Constrained Devices	2018	Proceedings of the 13th International Conference on Software Technologies	SCITEPRESS - Science and Technology Publications	http://dx.doi.org/10.5220/0006908905520562	http://dx.doi.org/10.5220/0006908905520562
0	Juliana Anochi, Sabrina Sambatti, Eduardo Luz, Haroldo Campos Velho	New learning strategy for supervised neural network: MPCA meta-heuristic approach	2016	Anais do 11. Congresso Brasileiro de Inteligência Computacional	SBIC	http://dx.doi.org/10.21528/cbic2013-154	http://dx.doi.org/10.21528/cbic2013-154
0	Fabricio Breve, Liang Zhao	Preventing Error Propagation In Semi-Supervised Learning Using Teams Of Walking Particles	2016	Anais do 10. Congresso Brasileiro de Inteligência Computacional	SBIC	http://dx.doi.org/10.21528/cbic2011-39.3	http://dx.doi.org/10.21528/cbic2011-39.3
0	Thap Panitanarak	Distributed Single-Source Shortest Path Algorithms with Two-Dimensional Graph Layout	2019	Unsupervised and Semi-Supervised Learning	Springer International Publishing	http://dx.doi.org/10.1007/978-3-030-22475-2_3	http://dx.doi.org/10.1007/978-3-030-22475-2_3
0	Robert E. Lowe, Michael W. Berry	Using Non-negative Tensor Decomposition for Unsupervised Textual Influence Modeling	2019	Unsupervised and Semi-Supervised Learning	Springer International Publishing	http://dx.doi.org/10.1007/978-3-030-22475-2_4	http://dx.doi.org/10.1007/978-3-030-22475-2_4
0	Sharmila Subudhi, Suvasini Panigrahi, Tanmay Kumar Behera	Use of OPTICS and supervised learning methods for database intrusion detection use of OPTICS and supervised learning methods for DIDS	2017	2017 2nd International Conference for Convergence in Technology (I2CT)	IEEE	http://dx.doi.org/10.1109/i2ct.2017.8226146	http://dx.doi.org/10.1109/i2ct.2017.8226146
0	Vlad-Sebastian Ionescu	New supervised learning approaches for sex identification in archaeology	2015	Proceedings of The 3rd International Virtual Research Conference In Technical Disciplines	Publishing Society	http://dx.doi.org/10.18638/rcitd.2015.3.1.60	http://dx.doi.org/10.18638/rcitd.2015.3.1.60
0	Robert Langs, Theodore Dorpat	Self-processing supervision	2018	Doing Supervision and being Supervised	Routledge	http://dx.doi.org/10.4324/9780429473876-15	http://dx.doi.org/10.4324/9780429473876-15
0	Toshitake Asabuki, Tomoki Fukai	Artificial Dendritic Neurons Enable Self-Supervised Temporal Feature Extraction	2019		Cold Spring Harbor Laboratory	http://dx.doi.org/10.1101/517888	http://dx.doi.org/10.1101/517888
0		Self-Supervised Relation Extraction	2019	Encyclopedia of Big Data Technologies	Springer International Publishing	http://dx.doi.org/10.1007/978-3-319-77525-8_100297	http://dx.doi.org/10.1007/978-3-319-77525-8_100297
0	Frédéric Ros, Serge Guillaume	From Supervised Instance and Feature Selection Algorithms to Dual Selection: A Review	2019	Sampling Techniques for Supervised or Unsupervised Tasks	Springer International Publishing	http://dx.doi.org/10.1007/978-3-030-29349-9_4	http://dx.doi.org/10.1007/978-3-030-29349-9_4
0	Langzhou Chen, Volker Leutnant	Acoustic Model Bootstrapping Using Semi-Supervised Learning	2019	Interspeech 2019	ISCA	http://dx.doi.org/10.21437/interspeech.2019-2818	http://dx.doi.org/10.21437/interspeech.2019-2818
0	Thomas Mailund	Supervised Learning	2017	Beginning Data Science in R	Apress	http://dx.doi.org/10.1007/978-1-4842-2671-1_6	http://dx.doi.org/10.1007/978-1-4842-2671-1_6
0		Supervised Machine Learning in Wind Forecasting and Ramp Event Prediction	2020	Supervised Machine Learning in Wind Forecasting and Ramp Event Prediction	Elsevier	http://dx.doi.org/10.1016/b978-0-12-821353-7.00005-3	http://dx.doi.org/10.1016/b978-0-12-821353-7.00005-3
0		Supervised Machine Learning in Wind Forecasting and Ramp Event Prediction	2020	Supervised Machine Learning in Wind Forecasting and Ramp Event Prediction	Elsevier	http://dx.doi.org/10.1016/b978-0-12-821353-7.00008-9	http://dx.doi.org/10.1016/b978-0-12-821353-7.00008-9
0		Supervised Machine Learning in Wind Forecasting and Ramp Event Prediction	2020	Supervised Machine Learning in Wind Forecasting and Ramp Event Prediction	Elsevier	http://dx.doi.org/10.1016/b978-0-12-821353-7.00022-3	http://dx.doi.org/10.1016/b978-0-12-821353-7.00022-3
0		Supervised Machine Learning in Wind Forecasting and Ramp Event Prediction	2020	Supervised Machine Learning in Wind Forecasting and Ramp Event Prediction	Elsevier	http://dx.doi.org/10.1016/b978-0-12-821353-7.00003-x	http://dx.doi.org/10.1016/b978-0-12-821353-7.00003-x
0		Supervised Machine Learning in Wind Forecasting and Ramp Event Prediction	2020	Supervised Machine Learning in Wind Forecasting and Ramp Event Prediction	Elsevier	http://dx.doi.org/10.1016/b978-0-12-821353-7.00020-x	http://dx.doi.org/10.1016/b978-0-12-821353-7.00020-x
0		Supervised Machine Learning in Wind Forecasting and Ramp Event Prediction	2020	Supervised Machine Learning in Wind Forecasting and Ramp Event Prediction	Elsevier	http://dx.doi.org/10.1016/b978-0-12-821353-7.00004-1	http://dx.doi.org/10.1016/b978-0-12-821353-7.00004-1
0		Supervised Machine Learning in Wind Forecasting and Ramp Event Prediction	2020	Supervised Machine Learning in Wind Forecasting and Ramp Event Prediction	Elsevier	http://dx.doi.org/10.1016/b978-0-12-821353-7.00010-7	http://dx.doi.org/10.1016/b978-0-12-821353-7.00010-7
0		Supervised Machine Learning in Wind Forecasting and Ramp Event Prediction	2020	Supervised Machine Learning in Wind Forecasting and Ramp Event Prediction	Elsevier	http://dx.doi.org/10.1016/b978-0-12-821353-7.00011-9	http://dx.doi.org/10.1016/b978-0-12-821353-7.00011-9
0	Zhongjian Wang	Research of E-mail Classification Based on Supervised Learning Method	2014		Science & Engineering Research Support soCiety	http://dx.doi.org/10.14257/astl.2014.53.32	http://dx.doi.org/10.14257/astl.2014.53.32
0		Supervised Learning	2016	Encyclopedia of Cancer	Springer Berlin Heidelberg	http://dx.doi.org/10.1007/978-3-662-46875-3_102213	http://dx.doi.org/10.1007/978-3-662-46875-3_102213
0		SUPERVISED LEARNING CLASSIFICATION OF INCOMPLETE CLINICAL DATA	2017	Informatics and Applications	Federal Investigation Centre for Information and Control	http://dx.doi.org/10.14357/19922264170303	http://dx.doi.org/10.14357/19922264170303
0	Jordan T. Thevenow-Harrison	The Incidental Learning of Feature Distributions in Supervised Classification	2019		Center for Open Science	http://dx.doi.org/10.31237/osf.io/7y8dk	http://dx.doi.org/10.31237/osf.io/7y8dk
0	Sugato Basu	Semi-Supervised Learning	2016	Encyclopedia of Database Systems	Springer New York	http://dx.doi.org/10.1007/978-1-4899-7993-3_609-2	http://dx.doi.org/10.1007/978-1-4899-7993-3_609-2
0		Supervised Machine Learning in Wind Forecasting and Ramp Event Prediction	2020		Elsevier	http://dx.doi.org/10.1016/c2019-0-03735-1	http://dx.doi.org/10.1016/c2019-0-03735-1
0		Supervised Learning	2020	A Hands-On Introduction to Data Science	Cambridge University Press	http://dx.doi.org/10.1017/9781108560412.010	http://dx.doi.org/10.1017/9781108560412.010
0	Marcos Sandim, Afonso Paiva	Supervised learning for boundary detection on particle systems	2020		SBMAC	http://dx.doi.org/10.5540/03.2020.007.01.0441	http://dx.doi.org/10.5540/03.2020.007.01.0441
0	Avrim Blum	Semi-supervised Learning	2016	Encyclopedia of Algorithms	Springer New York	http://dx.doi.org/10.1007/978-1-4939-2864-4_766	http://dx.doi.org/10.1007/978-1-4939-2864-4_766
0		Supervised Machine Learning	2017	Artificial Intelligence	Cambridge University Press	http://dx.doi.org/10.1017/9781108164085.008	http://dx.doi.org/10.1017/9781108164085.008
0	Xiaorong Zou	Supervised Learning Based On Filtered Information	2019	SSRN Electronic Journal	Elsevier BV	http://dx.doi.org/10.2139/ssrn.3500623	http://dx.doi.org/10.2139/ssrn.3500623
0	Sugato Basu	Semi-supervised Learning	2018	Encyclopedia of Database Systems	Springer New York	http://dx.doi.org/10.1007/978-1-4614-8265-9_609	http://dx.doi.org/10.1007/978-1-4614-8265-9_609
0	Rodrigo Fernandes de Mello, Moacir Antonelli Ponti	Assessing Supervised Learning Algorithms	2018	Machine Learning	Springer International Publishing	http://dx.doi.org/10.1007/978-3-319-94989-5_3	http://dx.doi.org/10.1007/978-3-319-94989-5_3
0	Butch Quinto	Supervised Learning	2020	Next-Generation Machine Learning with Spark	Apress	http://dx.doi.org/10.1007/978-1-4842-5669-5_3	http://dx.doi.org/10.1007/978-1-4842-5669-5_3
0	Pramod Singh	Supervised Machine Learning	2019	Learn PySpark	Apress	http://dx.doi.org/10.1007/978-1-4842-4961-1_6	http://dx.doi.org/10.1007/978-1-4842-4961-1_6
0	Pramod Singh, Avinash Manure	Supervised Learning with TensorFlow	2019	Learn TensorFlow 2.0	Apress	http://dx.doi.org/10.1007/978-1-4842-5558-2_2	http://dx.doi.org/10.1007/978-1-4842-5558-2_2
0	Chun-Hao Chao, Pin-Lun Hsu, Hung-Yi Lee, Yu-Chiang Frank Wang	Self-Supervised Deep Learning for Fisheye Image Rectification	2020	ICASSP 2020 - 2020 IEEE International Conference on Acoustics, Speech and Signal Processing (ICASSP)	IEEE	http://dx.doi.org/10.1109/icassp40776.2020.9054191	http://dx.doi.org/10.1109/icassp40776.2020.9054191
0	Mengyuan Yan, Yilin Zhu, Ning Jin, Jeannette Bohg	Self-Supervised Learning of State Estimation for Manipulating Deformable Linear Objects	2020	IEEE Robotics and Automation Letters	Institute of Electrical and Electronics Engineers (IEEE)	http://dx.doi.org/10.1109/lra.2020.2969931	http://dx.doi.org/10.1109/lra.2020.2969931
0	Dabae Kim, Sarthak Pathak, Alessandro Moro, Atsushi Yamashita, Hajime Asama	SelfSphNet: Motion Estimation of a Spherical Camera via Self-Supervised Learning	2020	IEEE Access	Institute of Electrical and Electronics Engineers (IEEE)	http://dx.doi.org/10.1109/access.2020.2977109	http://dx.doi.org/10.1109/access.2020.2977109
0	Alban Laflaquiere, Verena V. Hafner	Self-supervised Body Image Acquisition Using a Deep Neural Network for Sensorimotor Prediction	2019	2019 Joint IEEE 9th International Conference on Development and Learning and Epigenetic Robotics (ICDL-EpiRob)	IEEE	http://dx.doi.org/10.1109/devlrn.2019.8850717	http://dx.doi.org/10.1109/devlrn.2019.8850717
0	Yunlei Chen, Huimin Lu, Junhao Xiao, Hui Zhang	Traversable region detection based on near-to-far self-supervised incremental learning	2014	2014 International Conference on Multisensor Fusion and Information Integration for Intelligent Systems (MFI)	IEEE	http://dx.doi.org/10.1109/mfi.2014.6997747	http://dx.doi.org/10.1109/mfi.2014.6997747
0	Shuai Zhang, Zaidao Wen, Zhunga Liu, Quan Pan	Rotation Awareness Based Self-Supervised Learning for SAR Target Recognition	2019	IGARSS 2019 - 2019 IEEE International Geoscience and Remote Sensing Symposium	IEEE	http://dx.doi.org/10.1109/igarss.2019.8899169	http://dx.doi.org/10.1109/igarss.2019.8899169
0	Jaehoon Cho, Youngjung Kim, Hyungjoo Jung, Changjae Oh, Jaesung Youn, Kwanghoon Sohn	Multi-Task Self-Supervised Visual Representation Learning for Monocular Road Segmentation	2018	2018 IEEE International Conference on Multimedia and Expo (ICME)	IEEE	http://dx.doi.org/10.1109/icme.2018.8486472	http://dx.doi.org/10.1109/icme.2018.8486472
0	Takeshi Takahashi, Michael W. Lanighan, Roderic A. Grupen	Intrinsically Motivated Self-Supervised Deep Sensorimotor Learning for Grasping	2018	2018 IEEE/RSJ International Conference on Intelligent Robots and Systems (IROS)	IEEE	http://dx.doi.org/10.1109/iros.2018.8593424	http://dx.doi.org/10.1109/iros.2018.8593424
[truncated: 16 more rows]

## Sheet: gs "representation learning"
2021 resulting Self-Supervised Learning paper collection as published in A. Chowdhury, J. Rosenthal, J. Waring, R. Umeton, 2021.
[truncated: 1,002 more rows]

## Sheet: sc "representation learning"
2021 resulting Self-Supervised Learning paper collection as published in A. Chowdhury, J. Rosenthal, J. Waring, R. Umeton, 2021.
[truncated: 202 more rows]

[truncated: 5 more sheets: cf "representation learning", gs "selfsupervised learning", sc "selfsupervised learning", cf "selfsupervised learning", Acronyms]
